# Supplementary material for: Insights into adaptive divergence of Japanese mantis shrimp Oratosquilla oratoria inferred from comparative analysis of full-length transcriptomes
Source: Frontiers journal article supplement (doi:10.3389/fmars.2022.975686), 2022-08-23
Supplement: Table_5.xlsx [file Table_5.xlsx]

## Sheet: Sheet1
Table S5. Summary of Ka and Ks values of each orthologous gene pairs.
Ortholog_Id	North_Gene_Id	South_Gene_Id	Ka/Ks	tree_length_for_dN	tree_length_for_dS	Average_Ka	Average_Ks
OG00080	transcript_HQ_North_transcript23437/f2p0/3236	transcript_HQ_South_transcript/30463/f2p0/2004	0.11312	0.8173	7.2244	0.4086	3.6122
OG00142	transcript_HQ_North_transcript44962/f2p0/1540	transcript_HQ_South_transcript/38076/f7p0/1540	0	0	0.0077	NA	0.00385
OG00196	transcript_HQ_North_transcript33820/f3p0/2564	transcript_HQ_South_transcript/15124/f2p0/2954	0.20497	0.0073	0.0354	0.00365	0.01775
OG00295	transcript_HQ_North_transcript17824/f43p0/3584	transcript_HQ_South_transcript/8263/f2p0/3597	0.7689	0.0018	0.0023	0.0009	0.00115
OG00410	transcript_HQ_North_transcript42666/f9p0/1841	transcript_HQ_South_transcript/34001/f2p0/1783	0.16162	0.004	0.0249	0.002	0.0124
OG00419	transcript_HQ_North_transcript41659/f3p0/1949	transcript_HQ_South_transcript/30638/f22p0/1949	0.03315	0.0015	0.0459	0.00075	0.02295
OG00437	transcript_HQ_North_transcript30495/f5p0/2780	transcript_HQ_South_transcript/17503/f2p0/2794	0.19332	0.0041	0.0212	0.00205	0.0106
OG00458	transcript_HQ_North_transcript21324/f3p0/3343	transcript_HQ_South_transcript/27302/f6p0/2141	0.00352	0.5248	148.924	0.2624	74.462
OG00638	transcript_HQ_North_transcript35950/f139p0/2360	transcript_HQ_South_transcript/23973/f14p0/2361	0.12356	0.0056	0.0451	0.00275	0.0226
OG00646	transcript_HQ_North_transcript2559/f4p0/6177	transcript_HQ_South_transcript/20925/f7p0/2548	0.2146	0.0032	0.015	0.0016	0.0075
OG00733	transcript_HQ_North_transcript6824/f8p0/4866	transcript_HQ_South_transcript/2369/f11p0/4872	0.05009	0.0014	0.0277	0.0007	0.01385
OG00793	transcript_HQ_North_transcript38814/f3p0/2235	transcript_HQ_South_transcript/3368/f3p0/4499	0.15824	0.6835	4.3197	0.34175	2.15985
OG00835	transcript_HQ_North_transcript401/f14p0/7528	transcript_HQ_South_transcript/83/f2p0/7538	0.14644	0.0017	0.0119	0.00085	0.00595
OG00881	transcript_HQ_North_transcript46840/f43p0/882	transcript_HQ_South_transcript/46074/f366p0/879	0.48993	0.007	0.0144	0.00355	0.0072
OG01078	transcript_HQ_North_transcript11842/f3p0/4151	transcript_HQ_South_transcript/29940/f2p0/2019	0.00545	0.7919	145.348	0.396	72.6741
OG01125	transcript_HQ_North_transcript12696/f5p0/4058	transcript_HQ_South_transcript/14260/f3p0/3028	0.16703	0.0006	0.0037	0.0003	0.00185
OG01135	transcript_HQ_North_transcript34893/f10p0/2444	transcript_HQ_South_transcript/22061/f17p0/2425	0.28771	0.0026	0.0091	0.0013	0.00455
OG01148	transcript_HQ_North_transcript46918/f5p0/743	transcript_HQ_South_transcript/46527/f8p0/901	0	0	0.0169	NA	0.00845
OG01279	transcript_HQ_North_transcript6454/f6p0/4925	transcript_HQ_South_transcript/21997/f2p0/2496	0	0	0.0203	NA	0.01015
OG01310	transcript_HQ_North_transcript43516/f4p0/1723	transcript_HQ_South_transcript/34700/f17p0/1730	0.84401	0.0082	0.0097	0.0041	0.00485
OG01359	transcript_HQ_North_transcript46283/f2p0/1233	transcript_HQ_South_transcript/48181/f23p0/737	0.12377	0.0064	0.0517	0.0032	0.02585
OG01375	transcript_HQ_North_transcript43335/f15p0/1734	transcript_HQ_South_transcript/34575/f7p0/1735	0.28059	0.0247	0.0881	0.01235	0.044
OG01398	transcript_HQ_North_transcript30125/f10p0/2783	transcript_HQ_South_transcript/22029/f2p0/2486	0.01834	0.0006	0.0309	0.0003	0.01545
OG01412	transcript_HQ_North_transcript44230/f2p0/1652	transcript_HQ_South_transcript/36345/f3p0/1663	0	0	0.0411	NA	0.0205
OG01461	transcript_HQ_North_transcript7613/f7p0/4660	transcript_HQ_South_transcript/2891/f2p0/4692	0.29789	0.0071	0.0239	0.00355	0.01195
OG01504	transcript_HQ_North_transcript43847/f2p0/1714	transcript_HQ_South_transcript/39642/f6p0/1445	0.08155	0.8057	9.8792	0.40285	4.93965
OG01543	transcript_HQ_North_transcript43907/f68p0/1663	transcript_HQ_South_transcript/30685/f12p0/1957	0.36632	0.0103	0.028	0.00515	0.014
OG01545	transcript_HQ_North_transcript44795/f4p0/1533	transcript_HQ_South_transcript/36921/f12p0/1567	0.43396	0.0065	0.0149	0.00325	0.00745
OG01573	transcript_HQ_North_transcript46937/f2p0/697	transcript_HQ_South_transcript/48791/f8p0/709	0.15643	0.005	0.0322	0.00255	0.0161
OG01578	transcript_HQ_North_transcript7641/f2p0/4723	transcript_HQ_South_transcript/9519/f4p0/3467	0.02223	0.0005	0.0204	0.00025	0.0102
OG01609	transcript_HQ_North_transcript32712/f2p0/2659	transcript_HQ_South_transcript/24485/f2p0/2343	0.07759	0.6693	8.6264	0.33465	4.3132
OG01670	transcript_HQ_North_transcript7796/f8p0/4692	transcript_HQ_South_transcript/28679/f2p0/2083	0	0	0.0034	NA	0.0017
OG01911	transcript_HQ_North_transcript28306/f16p0/2914	transcript_HQ_South_transcript/30554/f3p0/1982	0	0	0.015	NA	0.0075
OG01919	transcript_HQ_North_transcript41883/f30p0/1866	transcript_HQ_South_transcript/31841/f103p0/1852	0.14761	0.0045	0.0307	0.00225	0.01535
OG01950	transcript_HQ_North_transcript26726/f7p0/2975	transcript_HQ_South_transcript/15857/f20p0/2839	0.18341	0.0024	0.0129	0.0012	0.0065
OG01957	transcript_HQ_North_transcript21490/f2p0/3359	transcript_HQ_South_transcript/9877/f2p0/3415	0.17404	0.0044	0.0255	0.00225	0.01275
OG02019	transcript_HQ_North_transcript33175/f3p0/2618	transcript_HQ_South_transcript/22239/f2p0/2480	0.26791	0.0026	0.0096	0.0013	0.0048
OG02024	transcript_HQ_North_transcript32862/f3p0/2627	transcript_HQ_South_transcript/26778/f2p0/2215	0.16129	0.0035	0.0217	0.00175	0.0109
OG02044	transcript_HQ_North_transcript31711/f6p0/2691	transcript_HQ_South_transcript/18973/f5p0/2671	0.18951	0.0049	0.0257	0.00245	0.01285
OG02051	transcript_HQ_North_transcript24318/f2p0/3185	transcript_HQ_South_transcript/11933/f2p0/3215	0.24843	0.0072	0.029	0.0036	0.01445
OG02085	transcript_HQ_North_transcript21756/f2p0/3357	transcript_HQ_South_transcript/14701/f3p0/2978	0.11165	0.0062	0.0552	0.0031	0.0276
OG02121	transcript_HQ_North_transcript32715/f2p0/2636	transcript_HQ_South_transcript/12667/f2p0/3150	0.00321	0.4182	130.218	0.2091	65.109
OG02134	transcript_HQ_North_transcript46538/f2p0/1127	transcript_HQ_South_transcript/44808/f2p0/979	0.26114	0.0472	0.1808	0.0236	0.0904
OG02153	transcript_HQ_North_transcript46849/f24p0/859	transcript_HQ_South_transcript/20264/f3p0/2605	0	0	0.0042	NA	0.0021
OG02182	transcript_HQ_North_transcript1634/f2p0/6668	transcript_HQ_South_transcript/555/f2p0/6526	0.21005	0.0028	0.0131	0.0014	0.00655
OG02224	transcript_HQ_North_transcript18724/f2p0/3561	transcript_HQ_South_transcript/7629/f3p0/3670	0.18661	0.0043	0.0229	0.0021	0.01145
OG02246	transcript_HQ_North_transcript44699/f2p0/1584	transcript_HQ_South_transcript/37269/f8p0/1581	0.18325	0.0075	0.041	0.00375	0.0205
OG02298	transcript_HQ_North_transcript32139/f4p0/2675	transcript_HQ_South_transcript/41358/f2p0/1332	0.04399	0.6288	14.2954	0.3144	7.1477
OG02315	transcript_HQ_North_transcript28813/f4p0/2895	transcript_HQ_South_transcript/15504/f10p0/2912	0.06776	0.0048	0.0707	0.0024	0.0354
OG02330	transcript_HQ_North_transcript46278/f2p0/1258	transcript_HQ_South_transcript/43677/f3p0/1172	0.30023	0.0046	0.0152	0.0023	0.0076
OG02333	transcript_HQ_North_transcript42529/f2p0/1858	transcript_HQ_South_transcript/39589/f3p0/1452	0.75082	0.0115	0.0153	0.00575	0.00765
OG02423	transcript_HQ_North_transcript37796/f10p0/2282	transcript_HQ_South_transcript/21919/f11p0/2437	0.35145	0.0069	0.0196	0.00345	0.0098
OG02449	transcript_HQ_North_transcript39302/f2p0/2166	transcript_HQ_South_transcript/27276/f5p0/2175	0.13011	0.0023	0.0174	0.00115	0.00865
OG02490	transcript_HQ_North_transcript18784/f2p0/3561	transcript_HQ_South_transcript/8082/f2p0/3617	0.20678	0.0066	0.0317	0.0033	0.01585
OG02492	transcript_HQ_North_transcript35174/f20p0/2416	transcript_HQ_South_transcript/22755/f9p0/2414	0.3888	0.0041	0.0104	0.002	0.0052
OG02511	transcript_HQ_North_transcript38346/f3p0/2233	transcript_HQ_South_transcript/5921/f4p0/3957	0.51222	0.0034	0.0066	0.0017	0.0033
OG02515	transcript_HQ_North_transcript38191/f7p0/2241	transcript_HQ_South_transcript/25684/f2p0/2281	0.0908	0.0054	0.0591	0.0027	0.02955
OG02532	transcript_HQ_North_transcript44520/f5p0/1607	transcript_HQ_South_transcript/36642/f33p0/1602	0	0	0.0064	NA	0.0032
OG02545	transcript_HQ_North_transcript12746/f3p0/4085	transcript_HQ_South_transcript/35051/f2p0/1724	NA	0.0042	0.0001	0.0021	NA
OG02558	transcript_HQ_North_transcript30460/f18p0/2748	transcript_HQ_South_transcript/17608/f6p0/2763	0	0	0.0033	NA	0.00165
OG02561	transcript_HQ_North_transcript24812/f2p0/3139	transcript_HQ_South_transcript/30386/f3p0/1982	1.06935	0.0053	0.005	0.0027	0.0025
OG02585	transcript_HQ_North_transcript14653/f4p0/3898	transcript_HQ_South_transcript/5646/f3p0/3993	0.09207	0.0033	0.0353	0.0016	0.0177
OG02587	transcript_HQ_North_transcript4222/f9p0/5468	transcript_HQ_South_transcript/55/f2p0/7998	0.07896	0.0014	0.0178	0.0007	0.00895
OG02600	transcript_HQ_North_transcript45081/f2p0/1529	transcript_HQ_South_transcript/38452/f4p0/1515	0	0	0.0159	NA	0.00795
OG02609	transcript_HQ_North_transcript41396/f3p0/1978	transcript_HQ_South_transcript/31266/f13p0/1933	0.08058	0.0051	0.0631	0.0025	0.03155
OG02612	transcript_HQ_North_transcript35868/f2p0/2413	transcript_HQ_South_transcript/9232/f6p0/3468	0.00498	0.462	92.6885	0.231	46.3443
OG02628	transcript_HQ_North_transcript33500/f5p0/2579	transcript_HQ_South_transcript/43849/f2p0/1153	0.488	0.1193	0.2445	0.05965	0.12225
OG02632	transcript_HQ_North_transcript46440/f7p0/1169	transcript_HQ_South_transcript/43588/f14p0/1167	0.1039	0.0041	0.0395	0.00205	0.01975
OG02641	transcript_HQ_North_transcript27813/f3p0/2961	transcript_HQ_South_transcript/4456/f6p0/4178	0.38886	0.0047	0.0122	0.00235	0.0061
OG02655	transcript_HQ_North_transcript22195/f4p0/3314	transcript_HQ_South_transcript/10097/f2p0/3396	0	0	0.0697	NA	0.03485
OG02656	transcript_HQ_North_transcript35900/f5p0/2414	transcript_HQ_South_transcript/22140/f6p0/2386	0.15232	0.0035	0.0231	0.00175	0.0115
OG02666	transcript_HQ_North_transcript2895/f2p0/6011	transcript_HQ_South_transcript/1720/f2p0/5204	0	0	0.0096	NA	0.0048
OG02699	transcript_HQ_North_transcript37826/f3p0/2282	transcript_HQ_South_transcript/2063/f3p0/5071	0.15338	0.0062	0.0403	0.0031	0.02015
OG02733	transcript_HQ_North_transcript34496/f2p0/2516	transcript_HQ_South_transcript/42551/f3p0/1253	0.00305	0.3673	120.47	0.1836	60.2349
OG02738	transcript_HQ_North_transcript38595/f29p0/2147	transcript_HQ_South_transcript/27538/f68p0/2146	0	0	0.0379	NA	0.01895
OG02755	transcript_HQ_North_transcript44060/f26p0/1628	transcript_HQ_South_transcript/32866/f4p0/1851	0.32367	0.0121	0.0375	0.0061	0.01875
OG02790	transcript_HQ_North_transcript41736/f4p0/1930	transcript_HQ_South_transcript/49203/f8p0/628	NA	0	0	NA	NA
OG02791	transcript_HQ_North_transcript37195/f7p0/2246	transcript_HQ_South_transcript/25677/f9p0/2242	0	0	0.0082	NA	0.0041
OG02799	transcript_HQ_North_transcript18343/f22p0/3544	transcript_HQ_South_transcript/33604/f3p0/1798	0.00316	0.3593	113.639	0.1797	56.8195
OG02831	transcript_HQ_North_transcript23357/f16p0/3214	transcript_HQ_South_transcript/22455/f33p0/2449	0.12576	0.0008	0.006	0.00035	0.003
OG02839	transcript_HQ_North_transcript23129/f7p0/3236	transcript_HQ_South_transcript/1104/f2p0/5742	0.52505	0.0137	0.0261	0.00685	0.01305
OG02848	transcript_HQ_North_transcript35213/f15p0/2453	transcript_HQ_South_transcript/22071/f8p0/2450	0.11299	0.0045	0.0394	0.00225	0.0197
OG02859	transcript_HQ_North_transcript30003/f6p0/2796	transcript_HQ_South_transcript/17391/f3p0/2776	0.48095	0.0172	0.0357	0.0086	0.01785
OG02899	transcript_HQ_North_transcript5879/f4p0/5039	transcript_HQ_South_transcript/2110/f2p0/5036	0	0	0.0065	NA	0.00325
OG02936	transcript_HQ_North_transcript25554/f3p0/3129	transcript_HQ_South_transcript/15127/f4p0/2915	0	0	0.0031	NA	0.00155
OG02937	transcript_HQ_North_transcript22626/f27p0/3253	transcript_HQ_South_transcript/11277/f3p0/3278	0.3695	0.0044	0.012	0.0022	0.006
OG02946	transcript_HQ_North_transcript35496/f2p0/2451	transcript_HQ_South_transcript/44035/f2p0/1151	0.10993	0.4855	4.416	0.24275	2.208
OG02984	transcript_HQ_North_transcript45936/f115p0/1312	transcript_HQ_South_transcript/41967/f4p0/1330	0.0449	0.0016	0.0346	0.00075	0.0173
OG02987	transcript_HQ_North_transcript20461/f2p0/3433	transcript_HQ_South_transcript/33416/f2p0/1897	0.00363	0.4372	120.467	0.2186	60.2334
OG03036	transcript_HQ_North_transcript19062/f2p0/3555	transcript_HQ_South_transcript/8570/f9p0/3546	0.81598	0.0064	0.0078	0.0032	0.0039
OG03195	transcript_HQ_North_transcript42574/f9p0/1849	transcript_HQ_South_transcript/18909/f4p0/2690	NA	0	0	NA	NA
OG03201	transcript_HQ_North_transcript38474/f2p0/2180	transcript_HQ_South_transcript/26848/f11p0/2183	0.12244	0.0006	0.0052	0.0003	0.0026
OG03213	transcript_HQ_North_transcript22078/f7p0/3284	transcript_HQ_South_transcript/11437/f8p0/3194	0.38007	0.0026	0.0068	0.0013	0.0034
OG03216	transcript_HQ_North_transcript24313/f2p0/3168	transcript_HQ_South_transcript/42274/f2p0/1275	0.62963	0.0198	0.0314	0.0099	0.01575
OG03218	transcript_HQ_North_transcript28346/f2p0/2924	transcript_HQ_South_transcript/4391/f2p0/4290	0	0	0.0161	NA	0.0081
OG03225	transcript_HQ_North_transcript24406/f3p0/3133	transcript_HQ_South_transcript/47057/f2p0/880	NA	0	0	NA	NA
OG03231	transcript_HQ_North_transcript34195/f2p0/2523	transcript_HQ_South_transcript/22209/f7p0/2525	0.45155	0.0013	0.003	0.00065	0.0015
OG03237	transcript_HQ_North_transcript13475/f2p0/4026	transcript_HQ_South_transcript/5362/f2p0/4008	0.28925	0.0025	0.0086	0.00125	0.0043
OG03251	transcript_HQ_North_transcript21296/f2p0/3363	transcript_HQ_South_transcript/17096/f4p0/2800	0.03757	0.3433	9.1389	0.17165	4.5694
OG03254	transcript_HQ_North_transcript43012/f17p0/1794	transcript_HQ_South_transcript/33236/f45p0/1787	0.23894	0.0044	0.0186	0.0022	0.0093
OG03257	transcript_HQ_North_transcript44439/f2p0/1620	transcript_HQ_South_transcript/36619/f3p0/1633	0	0	0.0501	NA	0.02505
OG03258	transcript_HQ_North_transcript17922/f5p0/3617	transcript_HQ_South_transcript/16514/f4p0/2847	0.04199	0.0007	0.0168	0.00035	0.0084
OG03268	transcript_HQ_North_transcript6503/f7p0/4940	transcript_HQ_South_transcript/1844/f21p0/5096	0	0	0.0064	NA	0.0032
OG03273	transcript_HQ_North_transcript37726/f28p0/2254	transcript_HQ_South_transcript/25493/f63p0/2251	0.10968	0.004	0.0361	0.002	0.01805
OG03276	transcript_HQ_North_transcript4381/f96p0/5202	transcript_HQ_South_transcript/1636/f6p0/5231	0.13069	0.0011	0.0083	0.00055	0.00415
OG03279	transcript_HQ_North_transcript28313/f2p0/2929	transcript_HQ_South_transcript/21268/f2p0/2542	0.26511	0.0038	0.0144	0.0019	0.0072
OG03284	transcript_HQ_North_transcript25171/f2p0/3127	transcript_HQ_South_transcript/12798/f2p0/3147	0.14957	0.004	0.0265	0.002	0.01325
OG03286	transcript_HQ_North_transcript41013/f8p0/1982	transcript_HQ_South_transcript/30153/f14p0/1976	0.41063	0.0106	0.0259	0.00535	0.01295
OG03291	transcript_HQ_North_transcript37197/f21p0/2266	transcript_HQ_South_transcript/25190/f36p0/2261	0.05569	0.0015	0.0261	0.00075	0.01305
OG03296	transcript_HQ_North_transcript13172/f2p0/4031	transcript_HQ_South_transcript/2228/f6p0/4920	0.20882	0.0021	0.0098	0.00105	0.0049
OG03298	transcript_HQ_North_transcript24392/f3p0/3170	transcript_HQ_South_transcript/11508/f4p0/3247	0.1017	0.0004	0.0044	0.0002	0.0022
OG03299	transcript_HQ_North_transcript31644/f10p0/2707	transcript_HQ_South_transcript/18007/f15p0/2707	0.11363	0.0039	0.0341	0.00195	0.017
OG03301	transcript_HQ_North_transcript14840/f2p0/3905	transcript_HQ_South_transcript/26045/f2p0/2242	0.37014	0.0061	0.0164	0.003	0.0082
OG03302	transcript_HQ_North_transcript46540/f3p0/1123	transcript_HQ_South_transcript/43957/f3p0/1125	0	0	0.057	NA	0.0285
OG03306	transcript_HQ_North_transcript164/f21p0/8426	transcript_HQ_South_transcript/30/f6p0/8425	0.03514	0.0002	0.0053	0.0001	0.00265
OG03308	transcript_HQ_North_transcript45220/f4p0/1491	transcript_HQ_South_transcript/38913/f5p0/1491	0.1363	0.0025	0.0183	0.00125	0.00915
OG03333	transcript_HQ_North_transcript31407/f2p0/2727	transcript_HQ_South_transcript/21238/f14p0/2514	0.3528	0.0036	0.0102	0.0018	0.0051
OG03339	transcript_HQ_North_transcript46837/f2p0/892	transcript_HQ_South_transcript/46669/f31p0/879	0	0	0.05	NA	0.025
OG03380	transcript_HQ_North_transcript43207/f12p0/1745	transcript_HQ_South_transcript/33693/f45p0/1736	0.4606	0.0119	0.0258	0.00595	0.0129
OG03385	transcript_HQ_North_transcript39637/f34p0/2075	transcript_HQ_South_transcript/26735/f3p0/2199	0.01824	0.0007	0.04	0.00035	0.02
OG03389	transcript_HQ_North_transcript42078/f4p0/1905	transcript_HQ_South_transcript/33904/f5p0/1793	0.25483	0.0164	0.0645	0.0082	0.03225
OG03393	transcript_HQ_North_transcript43721/f18p0/1695	transcript_HQ_South_transcript/35284/f25p0/1671	0.18417	0.0064	0.0348	0.0032	0.01735
OG03403	transcript_HQ_North_transcript45288/f3p0/1479	transcript_HQ_South_transcript/39146/f5p0/1471	0.20483	0.0056	0.0276	0.00285	0.0138
OG03410	transcript_HQ_North_transcript1594/f2p0/6726	transcript_HQ_South_transcript/649/f2p0/6268	0.14201	0.0025	0.0175	0.00125	0.0087
OG03414	transcript_HQ_North_transcript44341/f18p0/1596	transcript_LQ_South_transcript/34176/f2p0/1672	0	0	0.0117	NA	0.00585
OG03421	transcript_HQ_North_transcript10/f4p0/10590	transcript_HQ_South_transcript/3585/f2p0/4434	0.02507	0.0009	0.0359	0.00045	0.01795
OG03424	transcript_HQ_North_transcript39805/f3p0/2044	transcript_HQ_South_transcript/29467/f6p0/2029	0	0	0.0123	NA	0.0062
OG03426	transcript_HQ_North_transcript27223/f6p0/2983	transcript_HQ_South_transcript/12174/f2p0/3151	0.18713	0.005	0.0267	0.0025	0.0134
OG03429	transcript_HQ_North_transcript43522/f7p0/1725	transcript_HQ_South_transcript/33458/f4p0/1831	0.17662	0.0054	0.0304	0.0027	0.0152
OG03430	transcript_HQ_North_transcript16088/f2p0/3778	transcript_HQ_South_transcript/2853/f2p0/4670	0.39204	0.0018	0.0046	0.0009	0.0023
OG03432	transcript_HQ_North_transcript29566/f2p0/2808	transcript_HQ_South_transcript/17364/f2p0/2813	0.06565	0.0008	0.0115	0.0004	0.00575
OG03450	transcript_HQ_North_transcript35026/f7p0/2471	transcript_HQ_South_transcript/38062/f2p0/1544	0.56397	0.0083	0.0147	0.00415	0.0073
OG03452	transcript_HQ_North_transcript34268/f2p0/2527	transcript_HQ_South_transcript/35230/f3p0/1736	0.07673	0.0026	0.0334	0.0013	0.01675
OG03453	transcript_HQ_North_transcript31160/f2p0/2741	transcript_HQ_South_transcript/19013/f2p0/2723	0.0432	0.0067	0.155	0.00335	0.07745
OG03455	transcript_HQ_North_transcript43860/f3p0/1701	transcript_HQ_South_transcript/34771/f6p0/1703	0.10034	0.0044	0.044	0.0022	0.022
OG03457	transcript_HQ_North_transcript46193/f2p0/1267	transcript_HQ_South_transcript/42500/f5p0/1246	0.57631	0.0067	0.0116	0.00335	0.0058
OG03459	transcript_HQ_North_transcript34451/f4p0/2511	transcript_HQ_South_transcript/19918/f4p0/2631	0.15609	0.0075	0.0478	0.0037	0.02395
OG03460	transcript_HQ_North_transcript29520/f11p0/2832	transcript_HQ_South_transcript/16198/f4p0/2849	0.1167	0.0014	0.0116	0.0007	0.00585
OG03462	transcript_HQ_North_transcript25644/f8p0/3084	transcript_HQ_South_transcript/10646/f2p0/3367	0.11641	0.0039	0.0339	0.00195	0.01695
OG03471	transcript_HQ_North_transcript39893/f21p0/2081	transcript_HQ_South_transcript/27540/f324p0/2089	0.0621	0.0052	0.0836	0.0026	0.0418
OG03476	transcript_HQ_North_transcript193/f3p0/8272	transcript_HQ_South_transcript/46/f3p0/8227	0.08037	0.0019	0.0239	0.00095	0.01195
OG03503	transcript_HQ_North_transcript22539/f2p0/3293	transcript_HQ_South_transcript/14965/f6p0/2963	0	0	0.0219	NA	0.01095
OG03512	transcript_HQ_North_transcript43319/f3p0/1763	transcript_HQ_South_transcript/17997/f4p0/2751	NA	0.0044	0	0.0022	NA
OG03525	transcript_HQ_North_transcript38050/f2p0/2266	transcript_HQ_South_transcript/28905/f22p0/2009	1.10966	0.0075	0.0068	0.00375	0.0034
OG03528	transcript_HQ_North_transcript39686/f8p0/2107	transcript_HQ_South_transcript/28165/f4p0/2107	NA	0	0	NA	NA
OG03542	transcript_HQ_North_transcript45933/f49p0/1310	transcript_HQ_South_transcript/40367/f36p0/1325	NA	0.0015	0	0.00075	NA
OG03547	transcript_HQ_North_transcript5447/f18p0/5114	transcript_HQ_South_transcript/1792/f8p0/5101	0.11721	0.0021	0.0176	0.00105	0.0088
OG03553	transcript_HQ_North_transcript25403/f2p0/3104	transcript_HQ_South_transcript/13184/f2p0/3103	NA	0	0	NA	NA
OG03565	transcript_HQ_North_transcript46847/f3p0/871	transcript_HQ_South_transcript/46184/f65p0/861	0	0	0.0235	NA	0.01175
OG03567	transcript_HQ_North_transcript32799/f18p0/2629	transcript_HQ_South_transcript/5933/f4p0/3917	0	0	0.0019	NA	0.00095
OG03586	transcript_HQ_North_transcript26963/f3p0/2990	transcript_HQ_South_transcript/46477/f2p0/922	0	0	0.0224	NA	0.0112
OG03591	transcript_HQ_North_transcript1471/f2p0/6717	transcript_HQ_South_transcript/9568/f2p0/3453	0	0	0.006	NA	0.003
OG03598	transcript_HQ_North_transcript28824/f21p0/2865	transcript_HQ_South_transcript/9528/f3p0/3448	0.15329	0.0042	0.0277	0.0021	0.01385
OG03600	transcript_HQ_North_transcript40568/f10p0/2040	transcript_HQ_South_transcript/29377/f10p0/2039	0	0	0.0074	NA	0.0037
OG03606	transcript_HQ_North_transcript44217/f5p0/1642	transcript_HQ_South_transcript/36769/f3p0/1652	0.32988	0.0051	0.0154	0.0025	0.0077
OG03609	transcript_HQ_North_transcript28329/f56p0/2911	transcript_HQ_South_transcript/15634/f11p0/2911	0	0	0.0101	NA	0.00505
OG03610	transcript_HQ_North_transcript28517/f2p0/2914	transcript_HQ_South_transcript/31332/f4p0/1935	0.88513	0.011	0.0125	0.0055	0.0062
OG03615	transcript_HQ_North_transcript44958/f2p0/1536	transcript_HQ_South_transcript/37582/f17p0/1548	0.24653	0.0011	0.0043	0.00055	0.00215
OG03626	transcript_HQ_North_transcript28587/f2p0/2907	transcript_HQ_South_transcript/30872/f3p0/1970	0.35279	0.004	0.0113	0.002	0.0057
OG03631	transcript_HQ_North_transcript38397/f21p0/2221	transcript_HQ_South_transcript/25935/f36p0/2168	0.11414	0.0028	0.0244	0.0014	0.0122
OG03655	transcript_HQ_North_transcript44899/f4p0/1521	transcript_HQ_South_transcript/38217/f20p0/1510	0.27898	0.0035	0.0125	0.00175	0.00625
OG03660	transcript_HQ_North_transcript46233/f29p0/1216	transcript_HQ_South_transcript/43185/f2p0/1189	0	0	0.0638	NA	0.03185
OG03663	transcript_HQ_North_transcript23598/f3p0/3226	transcript_HQ_South_transcript/37496/f237p0/1495	0.04514	0.5319	11.784	0.266	5.89195
OG03669	transcript_HQ_North_transcript41546/f3p0/1970	transcript_HQ_South_transcript/30749/f4p0/1964	0.2793	0.0078	0.0279	0.0039	0.01395
OG03672	transcript_HQ_North_transcript9956/f3p0/4396	transcript_HQ_South_transcript/20564/f12p0/2567	0.15496	0.0033	0.0212	0.00165	0.0106
OG03679	transcript_HQ_North_transcript41854/f26p0/1888	transcript_HQ_South_transcript/32002/f13p0/1876	NA	0	0	NA	NA
OG03694	transcript_HQ_North_transcript6474/f33p0/4897	transcript_HQ_South_transcript/2302/f3p0/4906	0.19144	0.0015	0.0079	0.00075	0.00395
OG03700	transcript_HQ_North_transcript34096/f5p0/2535	transcript_HQ_South_transcript/21352/f9p0/2526	0.16281	0.0034	0.0211	0.00175	0.01055
OG03709	transcript_HQ_North_transcript1967/f2p0/6535	transcript_HQ_South_transcript/6101/f2p0/3896	0	0	0.0268	NA	0.0134
OG03722	transcript_HQ_North_transcript46885/f2p0/815	transcript_HQ_South_transcript/47745/f210p0/795	0.92146	0.0052	0.0056	0.0026	0.0028
OG03731	transcript_HQ_North_transcript46071/f2p0/1313	transcript_HQ_South_transcript/42245/f2p0/1287	0.07719	0.0029	0.0371	0.00145	0.01855
OG03732	transcript_HQ_North_transcript42650/f7p0/1807	transcript_HQ_South_transcript/34143/f2p0/1785	0.35001	0.0062	0.0177	0.0031	0.00885
OG03735	transcript_HQ_North_transcript24297/f5p0/3134	transcript_HQ_South_transcript/30152/f3p0/1980	0.2873	0.0033	0.0113	0.0016	0.00565
OG03738	transcript_HQ_North_transcript43594/f10p0/1705	transcript_HQ_South_transcript/35129/f8p0/1703	0	0	0.0378	NA	0.0189
OG03741	transcript_HQ_North_transcript45792/f2p0/1375	transcript_HQ_South_transcript/36616/f3p0/1644	0.35228	0.0062	0.0177	0.00315	0.00885
OG03743	transcript_HQ_North_transcript46032/f2p0/1314	transcript_HQ_South_transcript/41700/f2p0/1314	0	0	0.0053	NA	0.00265
OG03748	transcript_HQ_North_transcript46549/f5p0/1107	transcript_HQ_South_transcript/42097/f2p0/1294	0.35929	0.0042	0.0117	0.00215	0.00585
OG03755	transcript_HQ_North_transcript19344/f3p0/3518	transcript_HQ_South_transcript/21495/f2p0/2521	0.18264	0.0017	0.0095	0.00085	0.00475
OG03765	transcript_HQ_North_transcript8119/f34p0/4612	transcript_HQ_South_transcript/2898/f13p0/4620	0.04255	0.0004	0.0085	0.00015	0.00425
OG03770	transcript_HQ_North_transcript46627/f5p0/1069	transcript_HQ_South_transcript/44783/f56p0/1024	0.28505	0.0083	0.0292	0.00415	0.0146
OG03781	transcript_HQ_North_transcript40953/f2p0/2017	transcript_HQ_South_transcript/28816/f2p0/2077	0	0	0.0139	NA	0.007
OG03782	transcript_HQ_North_transcript46314/f2p0/1227	transcript_HQ_South_transcript/42561/f12p0/1222	0.07805	0.0024	0.0308	0.0012	0.0154
OG03797	transcript_HQ_North_transcript4038/f4p0/5572	transcript_HQ_South_transcript/1766/f2p0/5234	0.04532	0.0022	0.0475	0.00105	0.0238
OG03798	transcript_HQ_North_transcript4662/f3p0/5352	transcript_HQ_South_transcript/2057/f5p0/5023	0.14133	0.0007	0.005	0.00035	0.0025
OG03799	transcript_HQ_North_transcript39243/f3p0/2159	transcript_HQ_South_transcript/27682/f3p0/2152	0	0	0.0194	NA	0.0097
OG03810	transcript_HQ_North_transcript5951/f5p0/4947	transcript_HQ_South_transcript/36417/f4p0/1646	0	0	0.0092	NA	0.0046
OG03818	transcript_HQ_North_transcript10541/f2p0/4404	transcript_HQ_South_transcript/10625/f4p0/3272	0.11265	0.0044	0.0389	0.0022	0.01945
OG03824	transcript_HQ_North_transcript46570/f2p0/1114	transcript_HQ_South_transcript/44299/f5p0/1098	0.93566	0.0048	0.0051	0.0024	0.00255
OG03838	transcript_HQ_North_transcript203/f2p0/8247	transcript_HQ_South_transcript/6583/f52p0/3799	0	0	0.0021	NA	0.00105
OG03852	transcript_HQ_North_transcript43375/f9p0/1760	transcript_HQ_South_transcript/34376/f4p0/1760	0.04275	0.0018	0.0429	0.0009	0.02145
OG03873	transcript_HQ_North_transcript45269/f6p0/1471	transcript_HQ_South_transcript/38919/f18p0/1477	NA	0	0	NA	NA
OG03877	transcript_HQ_North_transcript13498/f2p0/4009	transcript_HQ_South_transcript/25222/f2p0/2328	0.07809	0.0015	0.0197	0.00075	0.0098
OG03879	transcript_HQ_North_transcript46334/f9p0/1213	transcript_HQ_South_transcript/37362/f2p0/1578	0.71474	0.0134	0.0188	0.0067	0.0094
OG03880	transcript_HQ_North_transcript45378/f2p0/1474	transcript_HQ_South_transcript/39119/f8p0/1469	0	0	0.0119	NA	0.00595
OG03881	transcript_HQ_North_transcript28487/f10p0/2892	transcript_HQ_South_transcript/2335/f3p0/4856	0.32094	0.0047	0.0148	0.00235	0.0074
OG03883	transcript_HQ_North_transcript34391/f36p0/2450	transcript_HQ_South_transcript/21974/f27p0/2451	0.08574	0.0018	0.0206	0.0009	0.0103
OG03885	transcript_HQ_North_transcript46807/f2p0/931	transcript_HQ_South_transcript/46442/f4p0/922	0.21334	0.0092	0.0432	0.00465	0.02165
OG03887	transcript_HQ_North_transcript27822/f2p0/2958	transcript_HQ_South_transcript/15767/f2p0/2906	0.05994	0.0038	0.0627	0.0019	0.03135
OG03892	transcript_HQ_North_transcript39482/f3p0/2153	transcript_HQ_South_transcript/27875/f2p0/2150	NA	0	0	NA	NA
OG03910	transcript_HQ_North_transcript32921/f3p0/2599	transcript_HQ_South_transcript/22854/f4p0/2432	NA	0.0044	0	0.0022	NA
OG03913	transcript_HQ_North_transcript8587/f16p0/4540	transcript_HQ_South_transcript/3286/f3p0/4543	0.3515	0.0037	0.0104	0.00185	0.00525
OG03914	transcript_HQ_North_transcript43461/f2p0/1758	transcript_HQ_South_transcript/34571/f6p0/1745	0.30514	0.0072	0.0235	0.00355	0.0118
OG03917	transcript_HQ_North_transcript43953/f5p0/1679	transcript_HQ_South_transcript/35468/f3p0/1721	0.34099	0.0038	0.011	0.00185	0.0055
OG03919	transcript_HQ_North_transcript43780/f3p0/1711	transcript_HQ_South_transcript/2817/f3p0/4683	1.3097	0.0169	0.0129	0.00845	0.00645
OG03921	transcript_HQ_North_transcript45785/f11p0/1366	transcript_HQ_South_transcript/40597/f15p0/1359	0.24973	0.0027	0.0106	0.00135	0.0053
OG03928	transcript_HQ_North_transcript42058/f2p0/1910	transcript_HQ_South_transcript/31837/f3p0/1910	0	0	0.0149	NA	0.00745
OG03937	transcript_HQ_North_transcript1099/f2p0/6848	transcript_HQ_South_transcript/369/f2p0/6788	0.15245	0.0077	0.0508	0.00385	0.0254
OG03939	transcript_HQ_North_transcript6143/f11p0/4982	transcript_HQ_South_transcript/2258/f2p0/4958	0	0	0.0091	NA	0.00455
OG03944	transcript_HQ_North_transcript42741/f7p0/1751	transcript_HQ_South_transcript/33094/f242p0/1725	0.38106	0.0072	0.019	0.0036	0.0095
OG03953	transcript_HQ_North_transcript16806/f18p0/3692	transcript_HQ_South_transcript/7389/f5p0/3702	0.21989	0.0032	0.0144	0.0016	0.00715
OG03957	transcript_HQ_North_transcript46775/f6p0/968	transcript_HQ_South_transcript/44792/f2p0/1086	NA	0	0	NA	NA
OG03962	transcript_HQ_North_transcript45559/f16p0/1408	transcript_HQ_South_transcript/38946/f56p0/1406	NA	0	0	NA	NA
OG03972	transcript_HQ_North_transcript46476/f2p0/1152	transcript_HQ_South_transcript/168/f2p0/6924	0.00398	0.5176	130.076	0.2588	65.0377
OG03977	transcript_HQ_North_transcript318/f2p0/7809	transcript_HQ_South_transcript/7899/f2p0/3650	0.26655	0.0033	0.0122	0.0016	0.0061
OG03984	transcript_HQ_North_transcript9379/f5p0/4469	transcript_HQ_South_transcript/5184/f2p0/4051	0.04838	0.001	0.0201	0.0005	0.01005
OG03986	transcript_HQ_North_transcript43701/f3p0/1715	transcript_HQ_South_transcript/34772/f10p0/1725	0.24993	0.0012	0.0048	0.0006	0.0024
OG03997	transcript_HQ_North_transcript30635/f5p0/2778	transcript_HQ_South_transcript/13287/f4p0/3108	0.25461	0.0033	0.0131	0.00165	0.0065
OG04008	transcript_HQ_North_transcript7674/f2p0/4628	transcript_HQ_South_transcript/9827/f3p0/3425	0	0	0.0295	NA	0.01475
OG04010	transcript_HQ_North_transcript21162/f3p0/3391	transcript_HQ_South_transcript/15522/f2p0/2940	0.44606	0.0098	0.0221	0.0049	0.011
OG04011	transcript_HQ_North_transcript40176/f25p0/2035	transcript_HQ_South_transcript/28819/f30p0/2018	0.05048	0.001	0.0193	0.0005	0.0096
OG04023	transcript_HQ_North_transcript36768/f2p0/2362	transcript_HQ_South_transcript/1281/f2p0/5567	0.38018	0.0275	0.0723	0.01375	0.0361
OG04027	transcript_HQ_North_transcript13188/f3p0/4033	transcript_HQ_South_transcript/49134/f233p0/587	0	0	0.0069	NA	0.00345
OG04033	transcript_HQ_North_transcript33541/f31p0/2496	transcript_HQ_South_transcript/20360/f33p0/2508	0.3692	0.004	0.0109	0.00205	0.00545
OG04034	transcript_HQ_North_transcript30631/f29p0/2686	transcript_HQ_South_transcript/18205/f14p0/2702	0.06446	0.0021	0.0328	0.00105	0.01645
OG04035	transcript_HQ_North_transcript39385/f7p0/2156	transcript_HQ_South_transcript/27438/f4p0/2156	0.02718	0.0017	0.0636	0.00085	0.0318
OG04041	transcript_HQ_North_transcript42901/f8p0/1772	transcript_HQ_South_transcript/34272/f2p0/1778	0	0	0.0178	NA	0.0089
OG04046	transcript_HQ_North_transcript2841/f4p0/6003	transcript_HQ_South_transcript/755/f2p0/6117	0	0	0.0056	NA	0.0028
OG04061	transcript_HQ_North_transcript20050/f2p0/3464	transcript_HQ_South_transcript/11261/f3p0/3259	0.29917	0.0032	0.0106	0.0016	0.0053
OG04073	transcript_HQ_North_transcript7885/f6p0/4657	transcript_HQ_South_transcript/3757/f3p0/4434	0.05294	0.0005	0.0097	0.00025	0.0048
OG04079	transcript_HQ_North_transcript14621/f2p0/3930	transcript_HQ_South_transcript/5755/f13p0/3927	0	0	0.0235	NA	0.0118
OG04095	transcript_HQ_North_transcript5601/f5p0/5110	transcript_HQ_South_transcript/1867/f2p0/5113	0	0	0.0124	NA	0.00615
OG04100	transcript_HQ_North_transcript30466/f2p0/2796	transcript_HQ_South_transcript/16468/f6p0/2821	NA	0.0032	0	0.0016	NA
OG04103	transcript_HQ_North_transcript8019/f38p0/4604	transcript_HQ_South_transcript/3050/f2p0/4605	0.43838	0.0054	0.0124	0.00275	0.00615
OG04107	transcript_HQ_North_transcript9262/f4p0/4483	transcript_HQ_South_transcript/1499/f2p0/5386	0.10972	0.004	0.0361	0.002	0.01805
OG04113	transcript_HQ_North_transcript43246/f5p0/1756	transcript_HQ_South_transcript/34195/f17p0/1712	0.24357	0.004	0.0165	0.002	0.00825
OG04117	transcript_HQ_North_transcript32585/f3p0/2630	transcript_HQ_South_transcript/19512/f4p0/2625	0	0	0.0237	NA	0.01185
OG04118	transcript_HQ_North_transcript38875/f3p0/2194	transcript_HQ_South_transcript/26918/f3p0/2193	0.10429	0.0014	0.0138	0.00075	0.0069
OG04119	transcript_HQ_North_transcript23534/f206p0/3119	transcript_HQ_South_transcript/12688/f79p0/3107	0.34437	0.0015	0.0044	0.00075	0.0022
OG04149	transcript_HQ_North_transcript46928/f2p0/715	transcript_HQ_South_transcript/48626/f2p0/746	1.2141	0.0474	0.039	0.0237	0.0195
OG04183	transcript_HQ_North_transcript3731/f2p0/5655	transcript_HQ_South_transcript/5195/f3p0/4056	0.60903	0.0033	0.0054	0.00165	0.00275
OG04196	transcript_HQ_North_transcript42053/f12p0/1892	transcript_HQ_South_transcript/28552/f2p0/2093	1.46756	0.0144	0.0098	0.0072	0.0049
OG04204	transcript_HQ_North_transcript40562/f54p0/1981	transcript_HQ_South_transcript/28874/f2p0/2089	NA	0.0012	0	0.0006	NA
OG04205	transcript_HQ_North_transcript34812/f2p0/2503	transcript_HQ_South_transcript/20139/f2p0/2608	0.2151	0.0287	0.1336	0.01435	0.0668
OG04206	transcript_HQ_North_transcript19386/f4p0/3509	transcript_HQ_South_transcript/45460/f9p0/1018	0	0	0.0605	NA	0.03025
OG04215	transcript_HQ_North_transcript21037/f2p0/3401	transcript_HQ_South_transcript/33615/f2p0/1813	0.43089	0.0193	0.0448	0.00965	0.0224
OG04233	transcript_HQ_North_transcript4876/f3p0/5300	transcript_HQ_South_transcript/31701/f2p0/1932	0.07736	0.0029	0.0381	0.00145	0.01905
OG04238	transcript_HQ_North_transcript2354/f15p0/6270	transcript_HQ_South_transcript/31421/f17p0/1923	0.53446	0.0131	0.0246	0.0066	0.0123
OG04296	transcript_HQ_North_transcript46332/f13p0/1202	transcript_HQ_South_transcript/27074/f3p0/2193	0.06919	0.0042	0.061	0.0021	0.0305
OG04306	transcript_HQ_North_transcript43723/f2p0/1721	transcript_HQ_South_transcript/35676/f5p0/1685	0.30695	0.0049	0.0159	0.00245	0.0079
OG04309	transcript_HQ_North_transcript39611/f2p0/2126	transcript_HQ_South_transcript/29921/f8p0/2009	0.59542	0.0125	0.0211	0.00625	0.01055
OG04435	transcript_HQ_North_transcript29621/f5p0/2823	transcript_HQ_South_transcript/29494/f6p0/2022	0.16329	0.0033	0.0203	0.0017	0.01015
OG04445	transcript_HQ_North_transcript27679/f13p0/2953	transcript_HQ_South_transcript/14920/f2p0/2968	0	0	0.0018	NA	0.0009
OG04458	transcript_HQ_North_transcript44276/f2p0/1635	transcript_HQ_South_transcript/36440/f6p0/1631	0.17824	0.002	0.0111	0.001	0.00555
OG04465	transcript_HQ_North_transcript3086/f3p0/5903	transcript_HQ_South_transcript/6452/f3p0/3840	0.10202	0.0008	0.0078	0.00035	0.0039
OG04488	transcript_HQ_North_transcript45184/f3p0/1501	transcript_HQ_South_transcript/19730/f2p0/2617	0.23096	0.0033	0.0143	0.00165	0.00715
OG04508	transcript_HQ_North_transcript35406/f2p0/2486	transcript_HQ_South_transcript/21365/f6p0/2520	0.02612	0.0008	0.0321	0.0004	0.01605
OG04545	transcript_HQ_North_transcript13662/f13p0/3962	transcript_HQ_South_transcript/5628/f3p0/3965	0.05019	0.0009	0.0179	0.00045	0.00895
OG04549	transcript_HQ_North_transcript42736/f3p0/1858	transcript_HQ_South_transcript/35120/f2p0/1716	0.29591	0.0071	0.0241	0.00355	0.01205
OG04550	transcript_HQ_North_transcript45020/f2p0/1537	transcript_HQ_South_transcript/37777/f2p0/1569	NA	0.0008	0	0.0004	NA
OG04551	transcript_HQ_North_transcript24486/f6p0/3149	transcript_HQ_South_transcript/5279/f6p0/3943	0.05804	0.001	0.0181	0.00055	0.00905
OG04552	transcript_HQ_North_transcript27897/f2p0/2958	transcript_HQ_South_transcript/15476/f5p0/2930	0.0266	0.0005	0.018	0.00025	0.009
OG04554	transcript_HQ_North_transcript30866/f16p0/2727	transcript_HQ_South_transcript/17805/f8p0/2745	0.04406	0.0007	0.0148	0.00035	0.0074
OG04563	transcript_HQ_North_transcript46950/f3p0/636	transcript_HQ_South_transcript/46667/f2p0/941	0.1663	0.0047	0.0284	0.00235	0.0142
OG04564	transcript_HQ_North_transcript6298/f8p0/4931	transcript_HQ_South_transcript/15888/f2p0/2898	0.02418	0.0013	0.0531	0.00065	0.02655
OG04565	transcript_HQ_North_transcript30103/f12p0/2782	transcript_HQ_South_transcript/17441/f3p0/2782	0	0	0.01	NA	0.005
OG04567	transcript_HQ_North_transcript13029/f12p0/4032	transcript_HQ_South_transcript/11732/f3p0/3227	0.12702	0.0009	0.0068	0.00045	0.0034
OG04568	transcript_HQ_North_transcript42381/f2p0/1872	transcript_HQ_South_transcript/29836/f2p0/2024	0.0813	0.0021	0.0264	0.00105	0.0132
OG04570	transcript_HQ_North_transcript11020/f38p0/4222	transcript_HQ_South_transcript/4353/f5p0/4218	0.11483	0.0044	0.0379	0.00215	0.01895
OG04571	transcript_HQ_North_transcript3279/f11p0/5818	transcript_HQ_South_transcript/15348/f4p0/2946	0	0	0.0112	NA	0.0056
OG04575	transcript_HQ_North_transcript26788/f2p0/3077	transcript_HQ_South_transcript/11036/f225p0/3201	0.35471	0.0156	0.044	0.0078	0.022
OG04576	transcript_HQ_North_transcript46741/f4p0/977	transcript_HQ_South_transcript/43362/f13p0/1183	0.15751	0.0031	0.0196	0.00155	0.0098
OG04577	transcript_HQ_North_transcript16006/f2p0/3781	transcript_HQ_South_transcript/47286/f22p0/810	0.00462	0.8712	188.738	0.4356	94.3688
OG04579	transcript_HQ_North_transcript30579/f14p0/2754	transcript_HQ_South_transcript/17607/f9p0/2760	NA	0	0	NA	NA
OG04580	transcript_HQ_North_transcript46824/f9p0/873	transcript_HQ_South_transcript/45877/f176p0/872	0.47169	0.01	0.0212	0.005	0.0106
OG04584	transcript_HQ_North_transcript45894/f2p0/1354	transcript_HQ_South_transcript/40993/f25p0/1354	0.31689	0.0049	0.0153	0.0024	0.0077
OG04585	transcript_HQ_North_transcript45775/f2p0/1353	transcript_HQ_South_transcript/27012/f2p0/2184	0.19788	0.004	0.0203	0.002	0.01015
OG04587	transcript_HQ_North_transcript37292/f4p0/2309	transcript_HQ_South_transcript/24538/f8p0/2304	0	0	0.0091	NA	0.00455
OG04591	transcript_HQ_North_transcript11864/f2p0/4139	transcript_HQ_South_transcript/7043/f2p0/3771	0	0	0.0236	NA	0.0118
OG04593	transcript_HQ_North_transcript28709/f9p0/2892	transcript_HQ_South_transcript/16422/f3p0/2866	0	0	0.0083	NA	0.00415
OG04594	transcript_HQ_North_transcript26145/f6p0/3062	transcript_HQ_South_transcript/26014/f2p0/2267	0.10848	0.0024	0.0222	0.0012	0.0111
OG04596	transcript_HQ_North_transcript40894/f2p0/2024	transcript_HQ_South_transcript/30247/f2p0/2009	0.0969	0.002	0.0202	0.001	0.0101
OG04598	transcript_HQ_North_transcript10889/f20p0/4208	transcript_HQ_South_transcript/4346/f3p0/4250	0.3861	0.0068	0.0176	0.0034	0.00875
OG04601	transcript_HQ_North_transcript9422/f3p0/4459	transcript_HQ_South_transcript/30687/f2p0/1994	0.09332	0.0026	0.0283	0.0013	0.0141
OG04602	transcript_HQ_North_transcript35979/f102p0/2343	transcript_HQ_South_transcript/22458/f8p0/2457	0	0	0.0046	NA	0.0023
OG04603	transcript_HQ_North_transcript38188/f60p0/2200	transcript_HQ_South_transcript/22591/f3p0/2401	1.53873	0.0048	0.0031	0.0024	0.00155
OG04605	transcript_HQ_North_transcript45449/f5p0/1441	transcript_HQ_South_transcript/39705/f23p0/1439	NA	0.0029	0	0.00145	NA
OG04606	transcript_HQ_North_transcript1423/f43p0/6670	transcript_HQ_South_transcript/438/f3p0/6681	0.10677	0.0017	0.0159	0.00085	0.00795
OG04607	transcript_HQ_North_transcript24234/f4p0/3153	transcript_HQ_South_transcript/8550/f4p0/3557	0.05818	0.0012	0.0208	0.0006	0.0104
OG04608	transcript_HQ_North_transcript41679/f2p0/1947	transcript_HQ_South_transcript/30487/f3p0/1987	0.40145	0.0016	0.004	0.0008	0.00205
OG04610	transcript_HQ_North_transcript30843/f9p0/2726	transcript_HQ_South_transcript/20477/f7p0/2549	0.70409	0.0094	0.0133	0.0047	0.00665
OG04614	transcript_HQ_North_transcript46424/f2p0/1184	transcript_HQ_South_transcript/40577/f2p0/1400	0.37187	0.0056	0.0151	0.0028	0.0076
OG04616	transcript_HQ_North_transcript46804/f4p0/940	transcript_HQ_South_transcript/46413/f7p0/938	NA	0	0	NA	NA
OG04617	transcript_HQ_North_transcript46029/f8p0/1281	transcript_HQ_South_transcript/41942/f11p0/1275	0	0	0.0333	NA	0.0167
OG04618	transcript_HQ_North_transcript42051/f15p0/1820	transcript_HQ_South_transcript/32666/f52p0/1809	0.05091	0.0009	0.0177	0.00045	0.0089
OG04619	transcript_HQ_North_transcript46047/f7p0/1298	transcript_HQ_South_transcript/41624/f4p0/1295	0.12085	0.0015	0.0125	0.00075	0.00625
OG04620	transcript_HQ_North_transcript44270/f4p0/1638	transcript_HQ_South_transcript/36487/f13p0/1637	0	0	0.016	NA	0.008
OG04621	transcript_HQ_North_transcript4648/f2p0/5356	transcript_HQ_South_transcript/1558/f7p0/5285	0.04653	0.002	0.0436	0.001	0.0218
OG04622	transcript_HQ_North_transcript14739/f2p0/3876	transcript_HQ_South_transcript/42590/f3p0/1270	0.62535	0.004	0.0064	0.002	0.0032
OG04626	transcript_HQ_North_transcript42063/f8p0/1906	transcript_HQ_South_transcript/31865/f11p0/1902	0.07411	0.0038	0.0516	0.0019	0.0258
OG04627	transcript_HQ_North_transcript30223/f4p0/2792	transcript_HQ_South_transcript/13822/f8p0/3062	0	0	0.0183	NA	0.0091
OG04629	transcript_HQ_North_transcript40323/f37p0/2049	transcript_HQ_South_transcript/28922/f28p0/2026	0.08318	0.0043	0.0511	0.0021	0.02555
OG04632	transcript_HQ_North_transcript39718/f12p0/2114	transcript_HQ_South_transcript/2619/f5p0/4714	0.26394	0.0012	0.0045	0.0006	0.00225
OG04633	transcript_HQ_North_transcript38242/f11p0/2228	transcript_HQ_South_transcript/26119/f7p0/2230	0	0	0.0015	NA	0.00075
OG04634	transcript_HQ_North_transcript35121/f18p0/2417	transcript_HQ_South_transcript/22909/f3p0/2416	0.25432	0.009	0.0352	0.00445	0.0176
OG04636	transcript_HQ_North_transcript46326/f3p0/1215	transcript_HQ_South_transcript/43303/f8p0/1173	0	0	0.0139	NA	0.00695
OG04640	transcript_HQ_North_transcript3665/f3p0/5668	transcript_HQ_South_transcript/1152/f2p0/5678	0.08882	0.0013	0.0151	0.00065	0.00755
OG04641	transcript_HQ_North_transcript40490/f12p0/2025	transcript_HQ_South_transcript/28736/f26p0/2014	0.03555	0.0009	0.0261	0.00045	0.0131
OG04643	transcript_HQ_North_transcript21073/f12p0/3361	transcript_HQ_South_transcript/2215/f2p0/4943	0	0	0.0257	NA	0.01285
OG04644	transcript_HQ_North_transcript41933/f7p0/1911	transcript_HQ_South_transcript/31771/f5p0/1913	0.88617	0.003	0.0033	0.0015	0.00165
OG04645	transcript_HQ_North_transcript5794/f22p0/5016	transcript_HQ_South_transcript/2013/f3p0/5023	0.11562	0.0032	0.0279	0.00165	0.01395
OG04647	transcript_HQ_North_transcript3143/f15p0/5865	transcript_HQ_South_transcript/956/f4p0/5873	0.20638	0.0014	0.0069	0.00075	0.00345
OG04648	transcript_HQ_North_transcript33050/f28p0/2606	transcript_HQ_South_transcript/1791/f4p0/5156	0.41899	0.0015	0.0035	0.00075	0.00175
OG04649	transcript_HQ_North_transcript13077/f2p0/4044	transcript_HQ_South_transcript/1226/f4p0/5626	0.12604	0.0017	0.0135	0.00085	0.0067
OG04651	transcript_HQ_North_transcript39132/f33p0/2139	transcript_HQ_South_transcript/27291/f12p0/2151	0.3894	0.0106	0.0272	0.0053	0.0136
OG04652	transcript_HQ_North_transcript42563/f7p0/1853	transcript_HQ_South_transcript/34941/f2p0/1780	0	0	0.0075	NA	0.00375
OG04657	transcript_HQ_North_transcript9512/f6p0/4448	transcript_HQ_South_transcript/3404/f3p0/4448	0	0	0.0056	NA	0.0028
OG04658	transcript_HQ_North_transcript38673/f4p0/2204	transcript_HQ_South_transcript/26728/f2p0/2200	0.35076	0.0354	0.1008	0.0177	0.0504
OG04662	transcript_HQ_North_transcript38086/f7p0/2239	transcript_HQ_South_transcript/26022/f6p0/2250	0	0	0.0045	NA	0.00225
OG04663	transcript_HQ_North_transcript18344/f2p0/3589	transcript_HQ_South_transcript/19881/f5p0/2618	0.09151	0.0006	0.0069	0.00035	0.00345
OG04664	transcript_HQ_North_transcript22540/f208p0/3231	transcript_HQ_South_transcript/11178/f95p0/3236	0.26966	0.0018	0.0067	0.0009	0.00335
OG04665	transcript_HQ_North_transcript28570/f2p0/2910	transcript_HQ_South_transcript/47310/f3p0/887	0	0	0.0107	NA	0.00535
OG04667	transcript_HQ_North_transcript42941/f3p0/1806	transcript_HQ_South_transcript/23881/f2p0/2373	0	0	0.0265	NA	0.01325
OG04670	transcript_HQ_North_transcript12041/f2p0/4137	transcript_HQ_South_transcript/28515/f3p0/2090	0.17421	0.0042	0.0243	0.0021	0.01215
OG04671	transcript_HQ_North_transcript29389/f30p0/2817	transcript_HQ_South_transcript/17637/f2p0/2761	0.04155	0.0013	0.0319	0.00065	0.01595
OG04673	transcript_HQ_North_transcript44725/f7p0/1570	transcript_HQ_South_transcript/37460/f12p0/1574	0	0	0.0069	NA	0.00345
OG04675	transcript_HQ_North_transcript32107/f3p0/2672	transcript_HQ_South_transcript/21542/f2p0/2519	0.1531	0.0018	0.012	0.0009	0.006
OG04678	transcript_HQ_North_transcript2584/f3p0/6186	transcript_HQ_South_transcript/23439/f40p0/2233	0.06021	0.0014	0.0239	0.0007	0.0119
OG04679	transcript_HQ_North_transcript46697/f2p0/1025	transcript_HQ_South_transcript/43090/f2p0/1213	0	0	0.1103	NA	0.05515
OG04680	transcript_HQ_North_transcript11650/f31p0/4086	transcript_HQ_South_transcript/4864/f2p0/4132	0.01352	0.0005	0.0406	0.00025	0.0203
OG04681	transcript_HQ_North_transcript43149/f3p0/1785	transcript_HQ_South_transcript/36502/f13p0/1593	0.3479	0.0115	0.0331	0.00575	0.0166
OG04682	transcript_HQ_North_transcript40444/f4p0/2055	transcript_HQ_South_transcript/29283/f7p0/2048	0.23499	0.0047	0.0199	0.00235	0.00995
OG04683	transcript_HQ_North_transcript18409/f32p0/3533	transcript_HQ_South_transcript/11480/f5p0/3254	0	0	0.0148	NA	0.0074
OG04689	transcript_HQ_North_transcript44612/f2p0/1596	transcript_HQ_South_transcript/35058/f2p0/1728	0.53331	0.0013	0.0024	0.00065	0.0012
OG04690	transcript_HQ_North_transcript46026/f4p0/1307	transcript_HQ_South_transcript/41679/f6p0/1294	0.14916	0.0037	0.0249	0.0019	0.0124
OG04691	transcript_HQ_North_transcript37013/f5p0/2333	transcript_HQ_South_transcript/21220/f2p0/2543	0.29556	0.0071	0.024	0.00355	0.012
OG04695	transcript_HQ_North_transcript46935/f2p0/704	transcript_HQ_South_transcript/48066/f24p0/778	0	0	0.0048	NA	0.00245
OG04697	transcript_HQ_North_transcript28897/f9p0/2878	transcript_HQ_South_transcript/16005/f6p0/2840	0.08293	0.003	0.0359	0.0015	0.0179
OG04699	transcript_HQ_North_transcript42717/f68p0/1788	transcript_HQ_South_transcript/32085/f184p0/1789	0	0	0.01	NA	0.005
OG04702	transcript_HQ_North_transcript24573/f3p0/3170	transcript_HQ_South_transcript/12828/f2p0/3165	0.23275	0.007	0.03	0.0035	0.015
OG04706	transcript_HQ_North_transcript38545/f19p0/2178	transcript_HQ_South_transcript/26667/f29p0/2173	0.05514	0.0012	0.022	0.0006	0.011
OG04707	transcript_HQ_North_transcript1807/f3p0/6590	transcript_HQ_South_transcript/587/f2p0/6375	0.07257	0.0003	0.0048	0.00015	0.0024
OG04709	transcript_HQ_North_transcript37525/f5p0/2235	transcript_HQ_South_transcript/7979/f13p0/3599	0.77124	0.0021	0.0028	0.00105	0.0014
OG04713	transcript_HQ_North_transcript2884/f2p0/5991	transcript_HQ_South_transcript/17256/f2p0/2798	0.00325	0.4514	138.983	0.2257	69.4917
OG04714	transcript_HQ_North_transcript11742/f2p0/4193	transcript_HQ_South_transcript/2706/f4p0/4703	0	0	0.0035	NA	0.00175
OG04716	transcript_HQ_North_transcript37673/f3p0/2389	transcript_HQ_South_transcript/24527/f11p0/2276	0.2046	0.0048	0.0233	0.0024	0.01165
OG04722	transcript_HQ_North_transcript46377/f41p0/1180	transcript_HQ_South_transcript/43162/f187p0/1160	0.24904	0.0042	0.0167	0.00205	0.00835
OG04723	transcript_HQ_North_transcript22217/f60p0/3275	transcript_HQ_South_transcript/11351/f24p0/3258	0.08043	0.004	0.0493	0.002	0.02465
OG04724	transcript_HQ_North_transcript33731/f3p0/2594	transcript_HQ_South_transcript/26464/f8p0/2208	0.46084	0.0025	0.0054	0.00125	0.0027
OG04725	transcript_HQ_North_transcript27732/f3p0/2967	transcript_HQ_South_transcript/3637/f2p0/4446	0	0	0.0052	NA	0.0026
OG04727	transcript_HQ_North_transcript37773/f34p0/2232	transcript_HQ_South_transcript/25248/f25p0/2247	0.46542	0.0047	0.0101	0.00235	0.0051
OG04728	transcript_HQ_North_transcript42206/f31p0/1851	transcript_HQ_South_transcript/32305/f4p0/1881	0.19644	0.0019	0.0098	0.001	0.00495
OG04729	transcript_HQ_North_transcript19106/f15p0/3519	transcript_HQ_South_transcript/33699/f3p0/1805	0	0	0.0381	NA	0.01905
OG04730	transcript_HQ_North_transcript44873/f2p0/1559	transcript_HQ_South_transcript/37925/f4p0/1552	0	0	0.0112	NA	0.0056
OG04732	transcript_HQ_North_transcript10754/f4p0/4291	transcript_HQ_South_transcript/7345/f3p0/3758	0.2085	0.0044	0.0213	0.0022	0.0106
OG04734	transcript_HQ_North_transcript35810/f31p0/2373	transcript_HQ_South_transcript/23277/f28p0/2368	0.0608	0.0025	0.041	0.00125	0.0205
OG04736	transcript_HQ_North_transcript29294/f2p0/2883	transcript_HQ_South_transcript/16832/f4p0/2835	0.07546	0.0009	0.0113	0.00045	0.00565
OG04737	transcript_HQ_North_transcript14149/f15p0/3931	transcript_HQ_South_transcript/23252/f17p0/2387	NA	0	0	NA	NA
OG04738	transcript_HQ_North_transcript29724/f8p0/2835	transcript_HQ_South_transcript/11068/f4p0/3295	0.0581	0.003	0.0519	0.0015	0.02595
OG04739	transcript_HQ_North_transcript25495/f2p0/3100	transcript_HQ_South_transcript/13431/f3p0/3083	0.17564	0.0038	0.0215	0.0019	0.0108
OG04741	transcript_HQ_North_transcript38353/f2p0/2236	transcript_HQ_South_transcript/42347/f4p0/1255	0.39612	0.0036	0.0091	0.0018	0.00455
OG04742	transcript_HQ_North_transcript36022/f5p0/2393	transcript_HQ_South_transcript/23516/f15p0/2382	0	0	0.0099	NA	0.00495
OG04743	transcript_HQ_North_transcript45617/f7p0/1404	transcript_HQ_South_transcript/40142/f22p0/1395	0.57022	0.0037	0.0065	0.00185	0.00325
OG04744	transcript_HQ_North_transcript35265/f43p0/2414	transcript_HQ_South_transcript/22836/f32p0/2414	0.36903	0.0018	0.005	0.0009	0.0025
OG04745	transcript_HQ_North_transcript45260/f2p0/1483	transcript_HQ_South_transcript/41827/f6p0/1281	0.1461	0.0016	0.0109	0.0008	0.00545
OG04747	transcript_HQ_North_transcript30037/f10p0/2805	transcript_HQ_South_transcript/17333/f2p0/2812	0.22143	0.0047	0.0213	0.0024	0.0107
OG04748	transcript_HQ_North_transcript21958/f4p0/3320	transcript_HQ_South_transcript/17066/f5p0/2805	0.29567	0.0045	0.0152	0.00225	0.0076
OG04751	transcript_HQ_North_transcript44461/f2p0/1611	transcript_HQ_South_transcript/36498/f2p0/1635	0	0	0.0144	NA	0.0072
OG04752	transcript_HQ_North_transcript46112/f10p0/1242	transcript_HQ_South_transcript/42295/f26p0/1243	NA	0	0	NA	NA
OG04754	transcript_HQ_North_transcript41388/f8p0/1945	transcript_HQ_South_transcript/30249/f24p0/1944	NA	0	0	NA	NA
OG04756	transcript_HQ_North_transcript43724/f5p0/1698	transcript_HQ_South_transcript/35303/f8p0/1700	0.03515	0.0009	0.0242	0.00045	0.0121
OG04759	transcript_HQ_North_transcript10894/f3p0/4269	transcript_HQ_South_transcript/20060/f2p0/2611	0.1448	0.0034	0.0233	0.0017	0.01165
OG04761	transcript_HQ_North_transcript22923/f9p0/3242	transcript_HQ_South_transcript/7656/f2p0/3676	0.07114	0.0027	0.0373	0.00135	0.01865
OG04763	transcript_HQ_North_transcript24121/f51p0/3051	transcript_HQ_South_transcript/13274/f20p0/3053	0.16812	0.0032	0.0191	0.0016	0.00955
OG04765	transcript_HQ_North_transcript44234/f8p0/1632	transcript_HQ_South_transcript/36630/f13p0/1619	0.16509	0.0048	0.0291	0.0024	0.01455
OG04766	transcript_HQ_North_transcript37971/f31p0/2251	transcript_HQ_South_transcript/18801/f2p0/2689	0.31288	0.0139	0.0445	0.00695	0.02225
OG04769	transcript_HQ_North_transcript35488/f2p0/2463	transcript_HQ_South_transcript/22582/f2p0/2451	NA	0	0	NA	NA
OG04770	transcript_HQ_North_transcript31063/f2p0/2743	transcript_HQ_South_transcript/20391/f2p0/2585	0.26075	0.0072	0.0277	0.0036	0.0139
OG04771	transcript_HQ_North_transcript42352/f5p0/1878	transcript_HQ_South_transcript/31382/f6p0/1874	0.29341	0.0072	0.0246	0.0036	0.0123
OG04772	transcript_HQ_North_transcript45621/f2p0/1404	transcript_HQ_South_transcript/40519/f2p0/1395	0.31223	0.0058	0.0186	0.0029	0.0093
OG04773	transcript_HQ_North_transcript32386/f24p0/2623	transcript_HQ_South_transcript/19795/f16p0/2620	0.33292	0.0011	0.0034	0.00055	0.00165
OG04774	transcript_HQ_North_transcript17127/f4p0/3685	transcript_HQ_South_transcript/7510/f8p0/3688	0.29397	0.004	0.0135	0.002	0.0067
OG04776	transcript_HQ_North_transcript46822/f2p0/906	transcript_HQ_South_transcript/46399/f19p0/901	0.47453	0.002	0.0043	0.001	0.00215
OG04778	transcript_HQ_North_transcript9100/f4p0/4482	transcript_HQ_South_transcript/3470/f2p0/4492	0.05021	0.0014	0.0287	0.0007	0.0144
OG04779	transcript_HQ_North_transcript46812/f2p0/927	transcript_HQ_South_transcript/46307/f78p0/918	0.08383	0.0023	0.0269	0.00115	0.01345
OG04782	transcript_HQ_North_transcript44756/f3p0/1551	transcript_HQ_South_transcript/36837/f15p0/1548	0	0	0.0226	NA	0.0113
OG04783	transcript_HQ_North_transcript26384/f2p0/2889	transcript_HQ_South_transcript/13472/f2p0/2910	0	0	0.0089	NA	0.00445
OG04785	transcript_HQ_North_transcript3840/f2p0/5629	transcript_HQ_South_transcript/5112/f2p0/4057	0.44153	0.0081	0.0183	0.00405	0.00915
OG04787	transcript_HQ_North_transcript40401/f2p0/2064	transcript_HQ_South_transcript/28003/f14p0/2056	NA	0	0	NA	NA
OG04788	transcript_HQ_North_transcript46055/f6p0/1305	transcript_HQ_South_transcript/42050/f2p0/1286	0.22002	0.0129	0.0588	0.00645	0.0294
OG04789	transcript_HQ_North_transcript26718/f6p0/3047	transcript_HQ_South_transcript/13611/f26p0/3004	0.37812	0.0029	0.0077	0.00145	0.00385
OG04790	transcript_HQ_North_transcript14325/f51p0/3845	transcript_HQ_South_transcript/1263/f2p0/5576	0.03871	0.0004	0.0105	0.0002	0.00525
OG04791	transcript_HQ_North_transcript12616/f6p0/4079	transcript_HQ_South_transcript/4991/f3p0/4080	NA	0.001	0	0.0005	NA
OG04794	transcript_HQ_North_transcript27301/f3p0/2967	transcript_HQ_South_transcript/12166/f2p0/2981	0.42226	0.0073	0.0172	0.0036	0.0086
OG04796	transcript_HQ_North_transcript25729/f26p0/3053	transcript_HQ_South_transcript/11161/f2p0/3314	0.33467	0.014	0.0419	0.007	0.0209
OG04797	transcript_HQ_North_transcript41516/f3p0/1963	transcript_HQ_South_transcript/30616/f16p0/1955	0	0	0.0242	NA	0.01215
OG04798	transcript_HQ_North_transcript46639/f36p0/1035	transcript_HQ_South_transcript/36093/f5p0/1668	0	0	0.0031	NA	0.00155
OG04799	transcript_HQ_North_transcript6140/f18p0/4935	transcript_HQ_South_transcript/2240/f2p0/4921	0.21165	0.0031	0.0145	0.00155	0.0072
OG04802	transcript_HQ_North_transcript27595/f3p0/2975	transcript_HQ_South_transcript/14795/f6p0/2984	0.21356	0.0043	0.0199	0.0021	0.01
OG04803	transcript_HQ_North_transcript9928/f34p0/4349	transcript_HQ_South_transcript/3807/f6p0/4356	0.23298	0.0071	0.0306	0.0036	0.01535
OG04804	transcript_HQ_North_transcript36730/f14p0/2340	transcript_HQ_South_transcript/24432/f5p0/2335	0	0	0.0211	NA	0.01055
OG04809	transcript_HQ_North_transcript40819/f9p0/1969	transcript_HQ_South_transcript/30911/f3p0/1969	0	0	0.0047	NA	0.00235
OG04810	transcript_HQ_North_transcript45216/f3p0/1490	transcript_HQ_South_transcript/39194/f4p0/1479	0.40209	0.0028	0.007	0.00145	0.0035
OG04811	transcript_HQ_North_transcript21084/f2p0/3402	transcript_HQ_South_transcript/25676/f2p0/2264	0.07008	0.0015	0.0207	0.00075	0.01035
OG04812	transcript_HQ_North_transcript36276/f2p0/2340	transcript_HQ_South_transcript/27658/f3p0/2146	0	0	0.0562	NA	0.0281
OG04814	transcript_HQ_North_transcript19605/f4p0/3491	transcript_HQ_South_transcript/8904/f3p0/3517	0.35399	0.0123	0.0349	0.00615	0.01745
OG04816	transcript_HQ_North_transcript43307/f59p0/1687	transcript_HQ_South_transcript/34844/f136p0/1684	0.12911	0.0031	0.0242	0.00155	0.0121
OG04817	transcript_HQ_North_transcript31717/f61p0/2612	transcript_HQ_South_transcript/2409/f2p0/4853	0	0	0.0075	NA	0.00375
OG04818	transcript_HQ_North_transcript46584/f3p0/1099	transcript_HQ_South_transcript/44331/f24p0/1094	0	0	0.0197	NA	0.00985
OG04819	transcript_HQ_North_transcript8619/f3p0/4566	transcript_HQ_South_transcript/3140/f2p0/4572	0.32862	0.0052	0.0159	0.0026	0.00795
OG04821	transcript_HQ_North_transcript40138/f9p0/2081	transcript_HQ_South_transcript/28311/f8p0/2095	0.15323	0.0008	0.0054	0.0004	0.0027
OG04822	transcript_HQ_North_transcript44232/f8p0/1616	transcript_HQ_South_transcript/36321/f15p0/1631	0.62631	0.0191	0.0305	0.0096	0.01525
OG04825	transcript_HQ_North_transcript20795/f2p0/3386	transcript_HQ_South_transcript/10077/f2p0/3380	0.28196	0.005	0.0178	0.00255	0.0089
OG04826	transcript_HQ_North_transcript22042/f4p0/3340	transcript_HQ_South_transcript/37420/f3p0/1587	NA	0	0	NA	NA
OG04828	transcript_HQ_North_transcript36717/f24p0/2342	transcript_HQ_South_transcript/24008/f21p0/2336	0	0	0.0148	NA	0.00735
OG04830	transcript_HQ_North_transcript42509/f34p0/1830	transcript_HQ_South_transcript/32618/f8p0/1844	0.17606	0.0027	0.0153	0.00135	0.00765
OG04831	transcript_HQ_North_transcript34249/f2p0/2535	transcript_HQ_South_transcript/23050/f2p0/2427	0.29351	0.0012	0.0041	0.0006	0.00205
OG04832	transcript_HQ_North_transcript44266/f30p0/1586	transcript_HQ_South_transcript/36119/f88p0/1609	0	0	0.041	NA	0.02055
OG04833	transcript_HQ_North_transcript33716/f23p0/2554	transcript_HQ_South_transcript/17754/f10p0/2760	NA	0	0	NA	NA
OG04835	transcript_HQ_North_transcript41143/f3p0/1956	transcript_HQ_South_transcript/31201/f2p0/1947	0.05106	0.0011	0.0217	0.00055	0.0108
OG04837	transcript_HQ_North_transcript45095/f3p0/1515	transcript_HQ_South_transcript/38439/f12p0/1489	0.28734	0.0136	0.0473	0.0068	0.0237
OG04838	transcript_HQ_North_transcript27087/f9p0/2984	transcript_HQ_South_transcript/16879/f3p0/2830	0	0	0.0042	NA	0.0021
OG04839	transcript_HQ_North_transcript19980/f2p0/3458	transcript_HQ_South_transcript/34450/f6p0/1754	0.94269	0.0132	0.014	0.0066	0.007
OG04843	transcript_HQ_North_transcript10964/f3p0/4266	transcript_HQ_South_transcript/10529/f3p0/3353	0.14685	0.0031	0.021	0.00155	0.0105
OG04845	transcript_HQ_North_transcript5561/f14p0/5115	transcript_HQ_South_transcript/1815/f3p0/5116	0.07589	0.0005	0.0068	0.00025	0.00335
OG04847	transcript_HQ_North_transcript7746/f3p0/4703	transcript_HQ_South_transcript/2594/f6p0/4670	0.29156	0.0059	0.0203	0.00295	0.01015
OG04848	transcript_HQ_North_transcript18671/f15p0/3531	transcript_HQ_South_transcript/25833/f5p0/2260	0	0	0.0137	NA	0.00685
OG04850	transcript_HQ_North_transcript33647/f12p0/2548	transcript_HQ_South_transcript/20759/f16p0/2544	0.06932	0.0031	0.0449	0.00155	0.0224
OG04851	transcript_HQ_North_transcript6833/f10p0/4859	transcript_HQ_South_transcript/5343/f2p0/4018	0	0	0.0068	NA	0.0034
OG04854	transcript_HQ_North_transcript33063/f2p0/2613	transcript_HQ_South_transcript/40887/f4p0/1363	0	0	0.0063	NA	0.00315
OG04855	transcript_HQ_North_transcript11807/f2p0/4161	transcript_HQ_South_transcript/5704/f9p0/3945	0.10318	0.002	0.0189	0.00095	0.00945
OG04856	transcript_HQ_North_transcript20458/f26p0/3382	transcript_HQ_South_transcript/7595/f2p0/3680	0.0347	0.0005	0.0133	0.00025	0.00665
OG04858	transcript_HQ_North_transcript45537/f3p0/1430	transcript_HQ_South_transcript/39195/f2p0/1471	0	0	0.012	NA	0.006
OG04859	transcript_HQ_North_transcript32291/f5p0/2673	transcript_HQ_South_transcript/19384/f17p0/2649	0.08767	0.0061	0.0698	0.00305	0.0349
OG04861	transcript_HQ_North_transcript42911/f8p0/1784	transcript_HQ_South_transcript/33282/f10p0/1780	0.19978	0.0032	0.0162	0.0016	0.0081
OG04862	transcript_HQ_North_transcript2937/f3p0/5973	transcript_HQ_South_transcript/594/f3p0/6376	0	0	0.0136	NA	0.0068
OG04863	transcript_HQ_North_transcript15000/f17p0/3855	transcript_HQ_South_transcript/6275/f8p0/3852	0.28834	0.0022	0.0077	0.00115	0.00385
OG04864	transcript_HQ_North_transcript42958/f3p0/1803	transcript_HQ_South_transcript/34037/f9p0/1771	0	0	0.0062	NA	0.0031
OG04865	transcript_HQ_North_transcript34757/f16p0/2489	transcript_HQ_South_transcript/21878/f7p0/2489	0.19526	0.0013	0.0068	0.00065	0.0034
OG04866	transcript_HQ_North_transcript5278/f9p0/5180	transcript_HQ_South_transcript/564/f2p0/6437	0.2019	0.0049	0.0241	0.0024	0.012
OG04868	transcript_HQ_North_transcript8742/f3p0/4555	transcript_HQ_South_transcript/2503/f4p0/4812	0	0	0.0153	NA	0.0077
OG04869	transcript_HQ_North_transcript23956/f113p0/3127	transcript_HQ_South_transcript/1147/f2p0/5675	0.40406	0.0033	0.0081	0.00165	0.00405
OG04871	transcript_HQ_North_transcript21141/f46p0/3272	transcript_HQ_South_transcript/10114/f6p0/3353	0.03946	0.0006	0.0155	0.0003	0.00775
OG04873	transcript_HQ_North_transcript34406/f131p0/2429	transcript_HQ_South_transcript/22711/f34p0/2413	0	0	0.0156	NA	0.0078
OG04874	transcript_HQ_North_transcript22267/f11p0/3301	transcript_HQ_South_transcript/11103/f23p0/3291	0.11404	0.0089	0.078	0.00445	0.03895
OG04875	transcript_HQ_North_transcript13918/f109p0/3892	transcript_HQ_South_transcript/5656/f24p0/3901	0	0	0.0035	NA	0.00175
OG04878	transcript_HQ_North_transcript34317/f16p0/2488	transcript_HQ_South_transcript/21688/f5p0/2505	0.06989	0.001	0.0148	0.0005	0.0074
OG04881	transcript_HQ_North_transcript37816/f2p0/2278	transcript_HQ_South_transcript/36280/f2p0/1656	0.57564	0.0113	0.0196	0.00565	0.0098
OG04882	transcript_HQ_North_transcript46723/f2p0/1015	transcript_HQ_South_transcript/45067/f64p0/971	0.10101	0.0038	0.0374	0.0019	0.0187
OG04883	transcript_HQ_North_transcript37828/f3p0/2237	transcript_HQ_South_transcript/25562/f4p0/2234	0	0	0.0192	NA	0.0096
OG04885	transcript_HQ_North_transcript40203/f24p0/2048	transcript_HQ_South_transcript/28777/f20p0/2044	0.26083	0.0043	0.0167	0.0022	0.0083
OG04887	transcript_HQ_North_transcript41927/f3p0/1916	transcript_HQ_South_transcript/22996/f3p0/2429	0.09895	0.0031	0.0313	0.00155	0.01565
OG04889	transcript_HQ_North_transcript32163/f13p0/2664	transcript_HQ_South_transcript/19129/f19p0/2664	0.13164	0.0022	0.0168	0.0011	0.0084
OG04890	transcript_HQ_North_transcript43336/f2p0/1759	transcript_HQ_South_transcript/34336/f16p0/1754	0.11999	0.0012	0.0101	0.0006	0.005
OG04891	transcript_HQ_North_transcript45581/f2p0/1435	transcript_HQ_South_transcript/1623/f2p0/5264	NA	0	0	NA	NA
OG04892	transcript_HQ_North_transcript45464/f4p0/1445	transcript_HQ_South_transcript/50111/f2p0/615	0.33146	0.0055	0.0166	0.00275	0.0083
OG04895	transcript_HQ_North_transcript42329/f6p0/1864	transcript_HQ_South_transcript/32365/f11p0/1860	0.3763	0.0032	0.0085	0.0016	0.00425
OG04897	transcript_HQ_North_transcript46652/f2p0/1059	transcript_HQ_South_transcript/44938/f4p0/1051	0	0	0.0238	NA	0.01195
OG04898	transcript_HQ_North_transcript41538/f2p0/1959	transcript_HQ_South_transcript/35312/f13p0/1705	NA	0	0	NA	NA
OG04900	transcript_HQ_North_transcript35250/f24p0/2406	transcript_HQ_South_transcript/45828/f2p0/999	0.14166	0.0034	0.0236	0.0017	0.0118
OG04902	transcript_HQ_North_transcript45498/f2p0/1436	transcript_HQ_South_transcript/37087/f5p0/1583	0	0	0.0068	NA	0.00335
OG04903	transcript_HQ_North_transcript2783/f2p0/6067	transcript_HQ_South_transcript/711/f6p0/6061	0.08024	0.0016	0.0202	0.0008	0.0101
OG04904	transcript_HQ_North_transcript40758/f4p0/1989	transcript_HQ_South_transcript/30576/f17p0/1952	0.17678	0.0052	0.0294	0.0026	0.0147
OG04906	transcript_HQ_North_transcript37538/f36p0/2292	transcript_HQ_South_transcript/24910/f11p0/2309	0.22025	0.0095	0.0431	0.00475	0.02155
OG04908	transcript_HQ_North_transcript33176/f12p0/2587	transcript_HQ_South_transcript/20414/f4p0/2589	0	0	0.0087	NA	0.00435
OG04909	transcript_HQ_North_transcript7725/f2p0/4673	transcript_HQ_South_transcript/20954/f2p0/2564	0.30039	0.0044	0.0145	0.00215	0.00725
OG04910	transcript_HQ_North_transcript29218/f5p0/2838	transcript_HQ_South_transcript/16635/f3p0/2859	0.21379	0.0023	0.0106	0.0011	0.0053
OG04911	transcript_HQ_North_transcript43111/f10p0/1771	transcript_HQ_South_transcript/34233/f6p0/1762	0.23828	0.0062	0.0262	0.00315	0.01305
OG04912	transcript_HQ_North_transcript41526/f8p0/1937	transcript_HQ_South_transcript/30870/f12p0/1940	61.4759	0.004	0.0001	0.002	5e-05
OG04914	transcript_HQ_North_transcript10947/f32p0/4160	transcript_HQ_South_transcript/4558/f23p0/4157	0.0644	0.0021	0.0329	0.00105	0.01645
OG04915	transcript_HQ_North_transcript15980/f7p0/3769	transcript_HQ_South_transcript/30163/f2p0/2002	0.20475	0.003	0.0146	0.0015	0.0073
OG04917	transcript_HQ_North_transcript10609/f2p0/4310	transcript_HQ_South_transcript/1089/f5p0/5766	0.49563	0.0037	0.0075	0.00185	0.00375
OG04918	transcript_HQ_North_transcript27904/f9p0/2926	transcript_HQ_South_transcript/15171/f10p0/2915	NA	0	0	NA	NA
OG04919	transcript_HQ_North_transcript34284/f90p0/2420	transcript_HQ_South_transcript/22549/f20p0/2420	0	0	0.0057	NA	0.00285
OG04923	transcript_HQ_North_transcript39574/f2p0/2135	transcript_HQ_South_transcript/27684/f2p0/2152	0.57505	0.0024	0.0042	0.0012	0.0021
OG04925	transcript_HQ_North_transcript5911/f18p0/4970	transcript_HQ_South_transcript/2010/f6p0/4983	0.29603	0.0018	0.006	0.0009	0.003
OG04926	transcript_HQ_North_transcript42010/f2p0/1940	transcript_HQ_South_transcript/18433/f6p0/2720	0.12293	0.0028	0.0228	0.0014	0.01135
OG04927	transcript_HQ_North_transcript45043/f5p0/1523	transcript_HQ_South_transcript/37701/f8p0/1564	0	0	0.0031	NA	0.00155
OG04928	transcript_HQ_North_transcript19934/f4p0/3471	transcript_HQ_South_transcript/8597/f2p0/3601	0	0	0.0067	NA	0.00335
OG04930	transcript_HQ_North_transcript33838/f31p0/2540	transcript_HQ_South_transcript/21315/f3p0/2545	0.1395	0.0069	0.0498	0.00345	0.0249
OG04931	transcript_HQ_North_transcript36985/f12p0/2337	transcript_HQ_South_transcript/23287/f17p0/2326	0	0	0.0246	NA	0.0123
OG04932	transcript_HQ_North_transcript15376/f2p0/3852	transcript_HQ_South_transcript/19356/f3p0/2677	0	0	0.0153	NA	0.00765
OG04933	transcript_HQ_North_transcript46810/f5p0/922	transcript_HQ_South_transcript/44484/f2p0/1103	0	0	0.0103	NA	0.00515
OG04934	transcript_HQ_North_transcript35717/f3p0/2431	transcript_HQ_South_transcript/23025/f3p0/2424	0.02324	0.0006	0.0268	0.0003	0.01335
OG04935	transcript_HQ_North_transcript25424/f3p0/3101	transcript_HQ_South_transcript/42774/f33p0/1163	0	0	0.0443	NA	0.02215
OG04937	transcript_HQ_North_transcript4342/f4p0/5442	transcript_HQ_South_transcript/716/f3p0/6194	0	0	0.0044	NA	0.0022
OG04938	transcript_HQ_North_transcript41169/f2p0/1997	transcript_HQ_South_transcript/34523/f17p0/1724	0.13325	0.0067	0.0506	0.00335	0.0253
OG04939	transcript_HQ_North_transcript46463/f2p0/1163	transcript_HQ_South_transcript/43674/f2p0/1164	0	0	0.0077	NA	0.00385
OG04940	transcript_HQ_North_transcript37269/f18p0/2297	transcript_HQ_South_transcript/24680/f21p0/2293	0.17994	0.0011	0.006	0.00055	0.003
OG04941	transcript_HQ_North_transcript41766/f6p0/1929	transcript_HQ_South_transcript/943/f2p0/5933	0	0	0.0083	NA	0.00415
OG04943	transcript_HQ_North_transcript39022/f4p0/2154	transcript_HQ_South_transcript/27362/f10p0/2143	0.0755	0.0045	0.059	0.00225	0.0295
OG04945	transcript_HQ_North_transcript46422/f2p0/1181	transcript_HQ_South_transcript/43417/f7p0/1140	0	0	0.0049	NA	0.00245
OG04946	transcript_HQ_North_transcript37376/f3p0/2318	transcript_HQ_South_transcript/24724/f3p0/2320	0.03598	0.0009	0.0261	0.0005	0.01305
OG04951	transcript_HQ_North_transcript38013/f35p0/2046	transcript_HQ_South_transcript/28085/f33p0/2066	0	0	0.01	NA	0.005
OG04953	transcript_HQ_North_transcript13938/f2p0/4041	transcript_HQ_South_transcript/2470/f3p0/4835	0.0344	0.0004	0.0128	0.0002	0.00645
OG04954	transcript_HQ_North_transcript37496/f17p0/2288	transcript_HQ_South_transcript/24046/f2p0/2365	0.0158	0.0007	0.0419	0.00035	0.021
OG04955	transcript_HQ_North_transcript44889/f4p0/1484	transcript_HQ_South_transcript/38746/f10p0/1478	0.10434	0.001	0.0098	0.0005	0.0049
OG04956	transcript_HQ_North_transcript6373/f2p0/4946	transcript_HQ_South_transcript/27996/f3p0/2129	0.20806	0.0051	0.0243	0.0025	0.01215
OG04958	transcript_HQ_North_transcript12426/f5p0/4102	transcript_HQ_South_transcript/35895/f2p0/1684	0.17343	0.0027	0.0153	0.0013	0.00765
OG04959	transcript_HQ_North_transcript36252/f4p0/2372	transcript_HQ_South_transcript/23489/f92p0/2378	0	0	0.0202	NA	0.0101
OG04960	transcript_HQ_North_transcript40608/f3p0/2047	transcript_HQ_South_transcript/29184/f4p0/2052	0	0	0.0076	NA	0.0038
OG04961	transcript_HQ_North_transcript46134/f21p0/1220	transcript_HQ_South_transcript/41279/f6p0/1295	0.08605	0.0023	0.0271	0.0012	0.01355
OG04962	transcript_HQ_North_transcript13183/f5p0/4012	transcript_HQ_South_transcript/29279/f2p0/2058	NA	0.0055	0	0.00275	NA
OG04963	transcript_HQ_North_transcript45197/f4p0/1481	transcript_HQ_South_transcript/38872/f2p0/1492	0.08778	0.003	0.0341	0.0015	0.0171
OG04964	transcript_HQ_North_transcript38372/f2p0/2241	transcript_HQ_South_transcript/25910/f13p0/2242	0.93909	0.0034	0.0036	0.0017	0.0018
OG04965	transcript_HQ_North_transcript28882/f42p0/2840	transcript_HQ_South_transcript/16289/f10p0/2857	0.10919	0.0025	0.023	0.00125	0.0115
OG04967	transcript_HQ_North_transcript46643/f3p0/1057	transcript_HQ_South_transcript/44959/f27p0/1028	0.0512	0.0016	0.0309	0.0008	0.01545
OG04968	transcript_HQ_North_transcript39316/f13p0/2136	transcript_HQ_South_transcript/27570/f4p0/2152	0.05936	0.0007	0.0118	0.00035	0.0059
OG04969	transcript_HQ_North_transcript24133/f12p0/3179	transcript_HQ_South_transcript/12672/f7p0/3151	0.78616	0.0105	0.0133	0.00525	0.0067
OG04971	transcript_HQ_North_transcript45133/f21p0/1494	transcript_HQ_South_transcript/37996/f68p0/1490	0.04641	0.0014	0.0303	0.0007	0.01515
OG04974	transcript_HQ_North_transcript3368/f2p0/5807	transcript_HQ_South_transcript/13891/f2p0/3071	0.03461	0.0013	0.0387	0.0007	0.01935
OG04976	transcript_HQ_North_transcript40929/f2p0/2003	transcript_HQ_South_transcript/34647/f3p0/1751	NA	0	0	NA	NA
OG04977	transcript_HQ_North_transcript16213/f2p0/3767	transcript_HQ_South_transcript/13525/f2p0/3070	0.36172	0.0078	0.0215	0.0039	0.01075
OG04980	transcript_HQ_North_transcript42552/f105p0/1781	transcript_HQ_South_transcript/33926/f102p0/1773	0.27487	0.0059	0.0216	0.003	0.01085
OG04981	transcript_HQ_North_transcript2477/f3p0/6188	transcript_HQ_South_transcript/4044/f3p0/4307	0.08104	0.003	0.0364	0.0015	0.01825
OG04984	transcript_HQ_North_transcript39233/f15p0/2159	transcript_HQ_South_transcript/27346/f13p0/2158	NA	0	0	NA	NA
OG04985	transcript_HQ_North_transcript41092/f7p0/1995	transcript_HQ_South_transcript/29907/f11p0/1997	0.19776	0.004	0.0203	0.002	0.01015
OG04986	transcript_HQ_North_transcript40754/f6p0/2012	transcript_HQ_South_transcript/14946/f2p0/2996	0.50547	0.0024	0.0047	0.0012	0.00235
OG04988	transcript_HQ_North_transcript33292/f4p0/2579	transcript_HQ_South_transcript/20269/f4p0/2596	0.28945	0.0075	0.0258	0.00375	0.0129
OG04990	transcript_HQ_North_transcript5226/f2p0/5208	transcript_HQ_South_transcript/2520/f9p0/4785	0	0	0.0046	NA	0.0023
OG04992	transcript_HQ_North_transcript10389/f2p0/4325	transcript_HQ_South_transcript/20973/f6p0/2540	NA	0	0	NA	NA
OG04994	transcript_HQ_North_transcript46806/f2p0/936	transcript_HQ_South_transcript/45853/f48p0/915	0	0	0.0268	NA	0.0134
OG04995	transcript_HQ_North_transcript300/f3p0/7778	transcript_HQ_South_transcript/73/f2p0/7763	0.12888	0.0009	0.0074	0.00045	0.00365
OG04996	transcript_HQ_North_transcript38663/f11p0/2199	transcript_HQ_South_transcript/22931/f5p0/2424	0.11354	0.0026	0.0229	0.0013	0.01145
OG04997	transcript_HQ_North_transcript20407/f2p0/3411	transcript_HQ_South_transcript/12151/f20p0/3177	1.144	0.0522	0.0456	0.0261	0.0228
OG04998	transcript_HQ_North_transcript9541/f3p0/4463	transcript_HQ_South_transcript/16544/f9p0/2836	0	0	0.0025	NA	0.00125
OG05000	transcript_HQ_North_transcript3401/f2p0/5777	transcript_HQ_South_transcript/13836/f2p0/3047	0.62271	0.0066	0.0106	0.0033	0.0053
OG05001	transcript_HQ_North_transcript27903/f9p0/2944	transcript_HQ_South_transcript/15233/f2p0/2954	0.07607	0.0012	0.0156	0.0006	0.0078
OG05005	transcript_HQ_North_transcript28089/f93p0/2881	transcript_HQ_South_transcript/15871/f16p0/2876	0.18744	0.0056	0.03	0.0028	0.015
OG05006	transcript_HQ_North_transcript46800/f2p0/951	transcript_HQ_South_transcript/46060/f61p0/930	0.14722	0.0034	0.0231	0.0017	0.01155
OG05007	transcript_HQ_North_transcript24482/f2p0/3158	transcript_HQ_South_transcript/32625/f10p0/1833	0	0	0.003	NA	0.0015
OG05008	transcript_HQ_North_transcript43883/f10p0/1682	transcript_HQ_South_transcript/34937/f31p0/1663	NA	0	0	NA	NA
OG05009	transcript_HQ_North_transcript35535/f2p0/2452	transcript_HQ_South_transcript/22405/f2p0/2471	NA	0.0015	0	0.00075	NA
OG05012	transcript_HQ_North_transcript46836/f2p0/893	transcript_HQ_South_transcript/46355/f8p0/908	0.49183	0.0123	0.025	0.00615	0.0125
OG05013	transcript_HQ_North_transcript39624/f3p0/2133	transcript_HQ_South_transcript/28132/f7p0/2100	0.22798	0.0128	0.0561	0.00635	0.02805
OG05015	transcript_HQ_North_transcript16502/f2p0/3727	transcript_HQ_South_transcript/7893/f2p0/3648	0.03369	0.0023	0.0697	0.00115	0.03485
OG05017	transcript_HQ_North_transcript44837/f3p0/1565	transcript_HQ_South_transcript/37804/f3p0/1562	0	0	0.0103	NA	0.00515
OG05018	transcript_HQ_North_transcript40820/f2p0/2029	transcript_HQ_South_transcript/32963/f3p0/1850	0.39627	0.004	0.01	0.00195	0.005
OG05019	transcript_HQ_North_transcript41622/f3p0/1946	transcript_HQ_South_transcript/30733/f2p0/1979	0	0	0.0176	NA	0.00875
OG05020	transcript_HQ_North_transcript19210/f8p0/3512	transcript_HQ_South_transcript/4149/f6p0/4283	0.61613	0.0037	0.0061	0.00185	0.003
OG05021	transcript_HQ_North_transcript37392/f4p0/2308	transcript_HQ_South_transcript/24949/f5p0/2310	0.16305	0.0029	0.0176	0.00145	0.0088
OG05023	transcript_HQ_North_transcript19648/f12p0/3458	transcript_HQ_South_transcript/9273/f6p0/3469	0	0	0.0049	NA	0.00245
OG05024	transcript_HQ_North_transcript14448/f46p0/3783	transcript_HQ_South_transcript/6405/f47p0/3767	0.06177	0.001	0.0166	0.0005	0.0083
OG05028	transcript_HQ_North_transcript23408/f4p0/3231	transcript_HQ_South_transcript/38308/f3p0/1525	0.07322	0.0023	0.0321	0.0012	0.01605
OG05031	transcript_HQ_North_transcript22984/f20p0/3210	transcript_HQ_South_transcript/11527/f4p0/3224	0	0	0.0274	NA	0.0137
OG05034	transcript_HQ_North_transcript46495/f2p0/1149	transcript_HQ_South_transcript/43929/f3p0/1150	0.11565	0.0015	0.0133	0.00075	0.00665
OG05035	transcript_HQ_North_transcript35506/f38p0/2408	transcript_HQ_South_transcript/3930/f2p0/4372	0	0	0.0325	NA	0.01625
OG05037	transcript_HQ_North_transcript22932/f57p0/3197	transcript_HQ_South_transcript/12513/f3p0/3168	0.244	0.0064	0.0262	0.0032	0.01305
OG05040	transcript_HQ_North_transcript41404/f2p0/1970	transcript_HQ_South_transcript/33036/f2p0/1846	0.40626	0.0039	0.0095	0.00195	0.00475
OG05041	transcript_HQ_North_transcript36919/f8p0/2332	transcript_HQ_South_transcript/24293/f29p0/2329	0.18731	0.0038	0.0201	0.0019	0.01
OG05043	transcript_HQ_North_transcript42448/f10p0/1847	transcript_HQ_South_transcript/32645/f18p0/1845	0.08364	0.0013	0.0157	0.00065	0.00785
OG05044	transcript_HQ_North_transcript22675/f2p0/3287	transcript_HQ_South_transcript/45565/f9p0/1003	0	0	0.0149	NA	0.00745
OG05046	transcript_HQ_North_transcript25505/f4p0/3089	transcript_HQ_South_transcript/13344/f3p0/3087	0.10178	0.002	0.0197	0.001	0.00985
OG05047	transcript_HQ_North_transcript24485/f3p0/3158	transcript_HQ_South_transcript/12867/f4p0/3137	0.18094	0.0049	0.0272	0.00245	0.01355
OG05048	transcript_HQ_North_transcript30965/f6p0/2753	transcript_HQ_South_transcript/17974/f3p0/2750	0.22073	0.0036	0.0165	0.00185	0.00825
OG05050	transcript_HQ_North_transcript40521/f64p0/1968	transcript_HQ_South_transcript/29746/f88p0/1985	0.20606	0.003	0.0147	0.0015	0.0074
OG05051	transcript_HQ_North_transcript25349/f2p0/3093	transcript_HQ_South_transcript/13665/f5p0/3053	0.14166	0.0018	0.013	0.00095	0.00655
OG05052	transcript_HQ_North_transcript23578/f2p0/3257	transcript_HQ_South_transcript/14787/f6p0/2970	NA	0	0	NA	NA
OG05053	transcript_HQ_North_transcript2757/f9p0/6025	transcript_HQ_South_transcript/12464/f2p0/3179	0.29941	0.0009	0.0028	0.00045	0.0014
OG05054	transcript_HQ_North_transcript39607/f4p0/2118	transcript_HQ_South_transcript/7349/f2p0/3706	0.24832	0.0015	0.0059	0.00075	0.00295
OG05056	transcript_HQ_North_transcript33886/f2p0/2553	transcript_HQ_South_transcript/23884/f2p0/2372	0.10193	0.0007	0.0072	0.00035	0.0036
OG05057	transcript_HQ_North_transcript35248/f17p0/2459	transcript_HQ_South_transcript/21601/f23p0/2460	NA	0	0	NA	NA
OG05059	transcript_HQ_North_transcript37425/f17p0/2279	transcript_HQ_South_transcript/24767/f21p0/2261	0.36533	0.0069	0.019	0.00345	0.00955
OG05060	transcript_HQ_North_transcript45300/f2p0/1480	transcript_HQ_South_transcript/38733/f9p0/1487	0.12507	0.0021	0.0167	0.001	0.00835
OG05062	transcript_HQ_North_transcript41491/f5p0/1962	transcript_HQ_South_transcript/19766/f3p0/2636	0.18428	0.0035	0.0188	0.00175	0.0094
OG05063	transcript_HQ_North_transcript44248/f7p0/1631	transcript_HQ_South_transcript/35783/f2p0/1630	0	0	0.003	NA	0.0015
OG05065	transcript_HQ_North_transcript11850/f49p0/4099	transcript_HQ_South_transcript/4646/f19p0/4115	0	0	0.0133	NA	0.00665
OG05066	transcript_HQ_North_transcript25213/f17p0/3075	transcript_HQ_South_transcript/13343/f4p0/3078	0.06473	0.001	0.0155	0.0005	0.00775
OG05067	transcript_HQ_North_transcript44704/f11p0/1569	transcript_HQ_South_transcript/37637/f18p0/1566	NA	0.0016	0	0.0008	NA
OG05068	transcript_HQ_North_transcript18522/f3p0/3579	transcript_HQ_South_transcript/8671/f4p0/3550	0.20229	0.0016	0.008	0.00085	0.004
OG05069	transcript_HQ_North_transcript41852/f29p0/1913	transcript_HQ_South_transcript/31452/f49p0/1911	0.06222	0.0029	0.0462	0.00145	0.02315
OG05070	transcript_HQ_North_transcript11741/f2p0/4165	transcript_HQ_South_transcript/8096/f3p0/3630	0.06679	0.0011	0.0159	0.00055	0.00795
OG05072	transcript_HQ_North_transcript25168/f4p0/3119	transcript_HQ_South_transcript/12983/f3p0/3116	0	0	0.0123	NA	0.00615
OG05074	transcript_HQ_North_transcript16300/f8p0/3750	transcript_HQ_South_transcript/6957/f2p0/3757	0.03018	0.001	0.0322	0.0005	0.0161
OG05077	transcript_HQ_North_transcript42091/f12p0/1892	transcript_HQ_South_transcript/32058/f37p0/1880	0.09714	0.0011	0.0111	0.00055	0.00555
OG05078	transcript_HQ_North_transcript12168/f34p0/4117	transcript_HQ_South_transcript/4811/f3p0/4117	0	0	0.0051	NA	0.0025
OG05079	transcript_HQ_North_transcript34782/f8p0/2487	transcript_HQ_South_transcript/31051/f9p0/1955	0.31074	0.0186	0.0598	0.0093	0.0299
OG05080	transcript_HQ_North_transcript2587/f15p0/6146	transcript_HQ_South_transcript/6474/f2p0/3830	0	0	0.0218	NA	0.01085
OG05083	transcript_HQ_North_transcript2189/f22p0/6225	transcript_HQ_South_transcript/7211/f3p0/3720	0.06373	0.0013	0.0197	0.0006	0.00985
OG05087	transcript_HQ_North_transcript46202/f3p0/1275	transcript_HQ_South_transcript/42132/f4p0/1268	1.67679	0.0067	0.004	0.00335	0.002
OG05088	transcript_HQ_North_transcript43759/f22p0/1683	transcript_HQ_South_transcript/32998/f114p0/1684	0	0	0.0198	NA	0.0099
OG05089	transcript_HQ_North_transcript2129/f8p0/6378	transcript_HQ_South_transcript/656/f10p0/6175	NA	0.0013	0	0.0006	NA
OG05092	transcript_HQ_North_transcript720/f4p0/7017	transcript_HQ_South_transcript/21840/f3p0/1999	0.99959	0.0132	0.0132	0.0066	0.0066
OG05093	transcript_HQ_North_transcript31640/f2p0/2828	transcript_HQ_South_transcript/49395/f2p0/683	0	0	0.0175	NA	0.00875
OG05094	transcript_HQ_North_transcript14952/f2p0/3902	transcript_HQ_South_transcript/8262/f4p0/3587	0.08232	0.0013	0.0163	0.0007	0.00815
OG05095	transcript_HQ_North_transcript38207/f13p0/2240	transcript_HQ_South_transcript/25090/f22p0/2242	0	0	0.0087	NA	0.00435
OG05096	transcript_HQ_North_transcript44211/f2p0/1651	transcript_HQ_South_transcript/35945/f4p0/1679	0.38418	0.0028	0.0072	0.00135	0.0036
OG05098	transcript_HQ_North_transcript40476/f3p0/2066	transcript_HQ_South_transcript/29069/f7p0/2051	0.07139	0.0007	0.0098	0.00035	0.0049
OG05099	transcript_HQ_North_transcript18144/f11p0/3590	transcript_HQ_South_transcript/11297/f9p0/3269	0.10832	0.0022	0.0203	0.0011	0.0101
OG05101	transcript_HQ_North_transcript28764/f3p0/2916	transcript_HQ_South_transcript/16049/f2p0/2894	0	0	0.0316	NA	0.0158
OG05102	transcript_HQ_North_transcript40831/f9p0/2021	transcript_HQ_South_transcript/29980/f2p0/2023	0	0	0.0068	NA	0.0034
OG05103	transcript_HQ_North_transcript37471/f3p0/2309	transcript_HQ_South_transcript/25672/f2p0/2267	0.23734	0.0017	0.007	0.00085	0.0035
OG05104	transcript_HQ_North_transcript46251/f3p0/1242	transcript_HQ_South_transcript/40608/f2p0/1391	0.10068	0.0019	0.0188	0.00095	0.0094
OG05107	transcript_HQ_North_transcript6559/f3p0/4873	transcript_HQ_South_transcript/13996/f2p0/3044	0	0	0.001	NA	0.0005
OG05109	transcript_HQ_North_transcript46293/f3p0/1225	transcript_HQ_South_transcript/42862/f5p0/1225	0.32645	0.004	0.0122	0.002	0.0061
OG05110	transcript_HQ_North_transcript3943/f3p0/5531	transcript_HQ_South_transcript/9091/f2p0/3500	0	0	0.0029	NA	0.00145
OG05111	transcript_HQ_North_transcript19733/f2p0/3546	transcript_HQ_South_transcript/11490/f2p0/3259	0	0	0.0163	NA	0.00815
OG05112	transcript_HQ_North_transcript17062/f30p0/3674	transcript_HQ_South_transcript/7468/f27p0/3669	0.08183	0.0018	0.0214	0.0009	0.0107
OG05115	transcript_HQ_North_transcript46218/f7p0/1257	transcript_HQ_South_transcript/38723/f4p0/1486	0.13765	0.0048	0.0346	0.0024	0.0173
OG05116	transcript_HQ_North_transcript23291/f4p0/3234	transcript_HQ_South_transcript/11943/f4p0/3225	0.11994	0.0028	0.0234	0.0014	0.0117
OG05117	transcript_HQ_North_transcript14434/f26p0/3899	transcript_HQ_South_transcript/17408/f2p0/2785	0.07382	0.001	0.0132	0.0005	0.0066
OG05118	transcript_HQ_North_transcript7473/f2p0/4835	transcript_HQ_South_transcript/34922/f2p0/1733	0	0	0.0194	NA	0.0097
OG05122	transcript_HQ_North_transcript37262/f3p0/2340	transcript_HQ_South_transcript/24691/f3p0/2337	0.01336	0.0016	0.1165	0.00075	0.05825
OG05125	transcript_HQ_North_transcript43661/f7p0/1662	transcript_HQ_South_transcript/1982/f2p0/5086	0.12486	0.0022	0.0175	0.00105	0.00875
OG05126	transcript_HQ_North_transcript24677/f2p0/3145	transcript_HQ_South_transcript/2681/f2p0/4741	0.09856	0.0031	0.0316	0.00155	0.0158
OG05127	transcript_HQ_North_transcript4123/f18p0/5411	transcript_HQ_South_transcript/28073/f2p0/2117	0	0	0.0099	NA	0.00495
OG05128	transcript_HQ_North_transcript36657/f17p0/2352	transcript_HQ_South_transcript/23484/f42p0/2352	0.10112	0.0013	0.013	0.00065	0.0065
OG05129	transcript_HQ_North_transcript5349/f43p0/5153	transcript_HQ_South_transcript/1771/f3p0/5155	0.16366	0.0026	0.0158	0.00125	0.00785
OG05130	transcript_HQ_North_transcript16788/f19p0/3688	transcript_HQ_South_transcript/7202/f9p0/3689	0.20088	0.006	0.0301	0.003	0.01505
OG05131	transcript_HQ_North_transcript45968/f3p0/1332	transcript_HQ_South_transcript/21361/f2p0/2561	NA	0.0064	0	0.0032	NA
OG05133	transcript_HQ_North_transcript46750/f2p0/997	transcript_HQ_South_transcript/45634/f73p0/945	0.07536	0.0031	0.0405	0.00155	0.0202
OG05134	transcript_HQ_North_transcript31449/f2p0/2720	transcript_HQ_South_transcript/26904/f2p0/2196	0.38422	0.0134	0.0349	0.0067	0.01745
OG05136	transcript_HQ_North_transcript3156/f2p0/5886	transcript_HQ_South_transcript/17948/f17p0/2695	0.12176	0.0011	0.0091	0.00055	0.00455
OG05137	transcript_HQ_North_transcript2549/f41p0/6150	transcript_HQ_South_transcript/702/f7p0/6150	0.23022	0.0045	0.0197	0.0023	0.0098
OG05139	transcript_HQ_North_transcript42592/f10p0/1834	transcript_HQ_South_transcript/33465/f2p0/1826	0.45314	0.0521	0.1149	0.026	0.0575
OG05141	transcript_HQ_North_transcript13286/f2p0/4033	transcript_HQ_South_transcript/13075/f3p0/3125	0.18027	0.0015	0.0083	0.00075	0.00415
OG05143	transcript_HQ_North_transcript16642/f169p0/3635	transcript_HQ_South_transcript/6798/f2p0/3639	0.29955	0.0081	0.0272	0.00405	0.0136
OG05144	transcript_HQ_North_transcript37274/f2p0/2277	transcript_HQ_South_transcript/24953/f3p0/2307	0	0	0.0196	NA	0.00975
OG05145	transcript_HQ_North_transcript33256/f14p0/2567	transcript_HQ_South_transcript/20378/f10p0/2574	0.13643	0.007	0.0515	0.0035	0.02575
OG05147	transcript_HQ_North_transcript46927/f4p0/712	transcript_HQ_South_transcript/48737/f3p0/714	0.22391	0.008	0.0359	0.004	0.0179
OG05149	transcript_HQ_North_transcript17376/f73p0/3612	transcript_HQ_South_transcript/7918/f3p0/3630	0.15794	0.0019	0.012	0.0009	0.006
OG05151	transcript_HQ_North_transcript43785/f39p0/1656	transcript_HQ_South_transcript/36375/f3p0/1656	0.69344	0.0306	0.0442	0.0153	0.02205
OG05154	transcript_HQ_North_transcript45173/f8p0/1495	transcript_HQ_South_transcript/35355/f2p0/1701	NA	0	0	NA	NA
OG05156	transcript_HQ_North_transcript29368/f3p0/2858	transcript_HQ_South_transcript/16875/f5p0/2810	0.15176	0.0031	0.0202	0.00155	0.0101
OG05157	transcript_HQ_North_transcript44995/f3p0/1538	transcript_HQ_South_transcript/38555/f5p0/1517	0.39838	0.0053	0.0134	0.0027	0.0067
OG05158	transcript_HQ_North_transcript44477/f2p0/1599	transcript_HQ_South_transcript/32948/f3p0/1846	0.08473	0.0075	0.0885	0.00375	0.04425
OG05159	transcript_HQ_North_transcript19374/f7p0/3414	transcript_HQ_South_transcript/9884/f4p0/3405	0.21569	0.0036	0.0165	0.00175	0.00825
OG05160	transcript_HQ_North_transcript42445/f3p0/1864	transcript_HQ_South_transcript/32524/f2p0/1863	NA	0	0	NA	NA
OG05161	transcript_HQ_North_transcript37116/f5p0/2321	transcript_HQ_South_transcript/41502/f5p0/1320	0	0	0.0036	NA	0.0018
OG05163	transcript_HQ_North_transcript19935/f3p0/3471	transcript_HQ_South_transcript/9224/f2p0/3491	0	0	0.0292	NA	0.01455
OG05164	transcript_HQ_North_transcript38984/f2p0/2172	transcript_HQ_South_transcript/17586/f12p0/2732	0.81365	0.0088	0.0109	0.0044	0.0054
OG05165	transcript_HQ_North_transcript22283/f6p0/3300	transcript_HQ_South_transcript/6796/f3p0/3786	0.4132	0.0049	0.0119	0.00245	0.006
OG05167	transcript_HQ_North_transcript11998/f69p0/4052	transcript_HQ_South_transcript/5058/f12p0/4057	0.7915	0.0019	0.0024	0.00095	0.0012
OG05168	transcript_HQ_North_transcript46520/f2p0/1136	transcript_HQ_South_transcript/43679/f21p0/1138	0.2286	0.0091	0.0396	0.0045	0.0198
OG05174	transcript_HQ_North_transcript15624/f12p0/3775	transcript_HQ_South_transcript/5908/f2p0/3891	0.09746	0.0021	0.0213	0.00105	0.01065
OG05175	transcript_HQ_North_transcript41365/f2p0/1985	transcript_HQ_South_transcript/31526/f14p0/1925	0.19071	0.0043	0.0225	0.00215	0.01125
OG05176	transcript_HQ_North_transcript33661/f2p0/2563	transcript_HQ_South_transcript/20712/f3p0/2573	0.04027	0.0022	0.0546	0.0011	0.0273
OG05178	transcript_HQ_North_transcript45514/f5p0/1439	transcript_HQ_South_transcript/39689/f43p0/1396	0	0	0.016	NA	0.00805
OG05179	transcript_HQ_North_transcript37188/f2p0/2331	transcript_HQ_South_transcript/38851/f2p0/1490	0	0	0.0157	NA	0.00785
OG05180	transcript_HQ_North_transcript31777/f3p0/2699	transcript_HQ_South_transcript/19247/f2p0/2689	0.03718	0.0011	0.0285	0.00055	0.01425
OG05181	transcript_HQ_North_transcript31871/f2p0/2704	transcript_LQ_South_transcript/30358/f2p0/2033	0.25304	0.0106	0.0417	0.0053	0.0209
OG05182	transcript_HQ_North_transcript46867/f3p0/842	transcript_HQ_South_transcript/47364/f20p0/824	0	0	0.0319	NA	0.01595
OG05184	transcript_HQ_North_transcript605/f2p0/7193	transcript_HQ_South_transcript/36449/f2p0/1642	0.38332	0.0063	0.0163	0.00315	0.00815
OG05185	transcript_HQ_North_transcript35040/f29p0/2414	transcript_HQ_South_transcript/23165/f3p0/2440	0	0	0.0085	NA	0.0043
OG05186	transcript_HQ_North_transcript17103/f2p0/3685	transcript_HQ_South_transcript/38107/f3p0/1542	0.11154	0.0035	0.0318	0.0018	0.0159
OG05187	transcript_HQ_North_transcript46565/f9p0/1107	transcript_HQ_South_transcript/44185/f47p0/1089	0	0	0.0325	NA	0.0163
OG05188	transcript_HQ_North_transcript9108/f3p0/4495	transcript_HQ_South_transcript/1439/f2p0/5422	0	0	0.0152	NA	0.0076
OG05189	transcript_HQ_North_transcript43225/f4p0/1737	transcript_HQ_South_transcript/24276/f3p0/2360	0.18881	0.004	0.0212	0.002	0.0106
OG05190	transcript_HQ_North_transcript12342/f11p0/4096	transcript_HQ_South_transcript/5038/f3p0/4069	0.23607	0.0042	0.0176	0.0021	0.0088
OG05194	transcript_HQ_North_transcript26803/f2p0/3023	transcript_HQ_South_transcript/25150/f2p0/2294	0	0	0.0091	NA	0.00455
OG05195	transcript_HQ_North_transcript17255/f6p0/3666	transcript_HQ_South_transcript/7532/f5p0/3673	0.03937	0.0004	0.0111	0.0002	0.00555
OG05196	transcript_HQ_North_transcript28342/f2p0/2920	transcript_HQ_South_transcript/52598/f2p0/378	1.75477	0.018	0.0103	0.009	0.00515
OG05197	transcript_HQ_North_transcript35527/f33p0/2394	transcript_HQ_South_transcript/22528/f48p0/2397	0.28876	0.0058	0.0202	0.00295	0.0101
OG05202	transcript_HQ_North_transcript10265/f8p0/4334	transcript_HQ_South_transcript/4014/f2p0/4331	0	0	0.0081	NA	0.004
OG05207	transcript_HQ_North_transcript35631/f11p0/2430	transcript_HQ_South_transcript/22808/f15p0/2415	0	0	0.0321	NA	0.01605
OG05208	transcript_HQ_North_transcript7723/f2p0/4710	transcript_HQ_South_transcript/23491/f2p0/2390	0.15492	0.0097	0.0629	0.00485	0.03145
OG05210	transcript_HQ_North_transcript32135/f38p0/2646	transcript_HQ_South_transcript/17090/f23p0/2645	NA	0	0	NA	NA
OG05212	transcript_HQ_North_transcript37618/f3p0/2285	transcript_HQ_South_transcript/25102/f3p0/2310	0	0	0.0085	NA	0.0043
OG05213	transcript_HQ_North_transcript16948/f6p0/3694	transcript_HQ_South_transcript/7526/f6p0/3691	0.07167	0.0009	0.0121	0.00045	0.00605
OG05214	transcript_HQ_North_transcript45106/f4p0/1507	transcript_HQ_South_transcript/37965/f28p0/1481	0	0	0.0032	NA	0.0016
OG05216	transcript_HQ_North_transcript27890/f2p0/2957	transcript_HQ_South_transcript/31850/f5p0/1908	0.06666	0.0018	0.027	0.0009	0.0135
OG05217	transcript_HQ_North_transcript36677/f7p0/2362	transcript_HQ_South_transcript/24137/f6p0/2350	0	0	0.0024	NA	0.0012
OG05218	transcript_HQ_North_transcript43817/f39p0/1638	transcript_HQ_South_transcript/35413/f95p0/1651	0	0	0.0075	NA	0.00375
OG05220	transcript_HQ_North_transcript27759/f53p0/2926	transcript_HQ_South_transcript/15451/f55p0/2891	0.1787	0.004	0.0224	0.002	0.01115
OG05221	transcript_HQ_North_transcript44296/f8p0/1565	transcript_HQ_South_transcript/35163/f2p0/1740	0	0	0.0028	NA	0.00135
OG05222	transcript_HQ_North_transcript35897/f3p0/2409	transcript_HQ_South_transcript/34827/f2p0/1756	0.11001	0.0026	0.0238	0.00135	0.0119
OG05224	transcript_HQ_North_transcript22711/f3p0/3304	transcript_HQ_South_transcript/23712/f5p0/2385	0.01159	0.3413	29.4516	0.17065	14.7258
OG05225	transcript_HQ_North_transcript34861/f5p0/2479	transcript_HQ_South_transcript/22112/f2p0/2482	0	0	0.0078	NA	0.0039
OG05226	transcript_HQ_North_transcript32505/f93p0/2641	transcript_HQ_South_transcript/19844/f6p0/2627	0.51939	0.0073	0.014	0.00365	0.007
OG05227	transcript_HQ_North_transcript44751/f2p0/1587	transcript_HQ_South_transcript/36022/f7p0/1631	0	0	0.0176	NA	0.00885
OG05228	transcript_HQ_North_transcript231/f4p0/8108	transcript_HQ_South_transcript/16088/f2p0/2881	0	0	0.0035	NA	0.0017
OG05229	transcript_HQ_North_transcript35186/f2p0/2494	transcript_HQ_South_transcript/21959/f22p0/2407	0.08923	0.0039	0.0436	0.00195	0.02185
OG05230	transcript_HQ_North_transcript19004/f2p0/3545	transcript_HQ_South_transcript/40727/f3p0/1383	0	0	0.0157	NA	0.00785
OG05231	transcript_HQ_North_transcript15632/f5p0/3764	transcript_HQ_South_transcript/13810/f3p0/3050	0	0	0.0048	NA	0.0024
OG05232	transcript_HQ_North_transcript39641/f45p0/2106	transcript_HQ_South_transcript/27383/f41p0/2136	0.01129	0.0008	0.0718	0.0004	0.03585
OG05234	transcript_HQ_North_transcript26139/f3p0/3055	transcript_HQ_South_transcript/13386/f2p0/3098	NA	0.0021	0	0.00105	NA
OG05236	transcript_HQ_North_transcript41394/f36p0/1913	transcript_HQ_South_transcript/30736/f12p0/1957	0.18815	0.0018	0.0096	0.00095	0.0048
OG05239	transcript_HQ_North_transcript3715/f7p0/5628	transcript_HQ_South_transcript/2505/f2p0/4789	0.21427	0.0022	0.0101	0.0011	0.00505
OG05241	transcript_HQ_North_transcript46630/f16p0/1058	transcript_HQ_South_transcript/45740/f4p0/979	0.79436	0.003	0.0038	0.00145	0.0019
OG05242	transcript_HQ_North_transcript32696/f4p0/2644	transcript_HQ_South_transcript/19360/f4p0/2648	0.2549	0.0032	0.0127	0.00165	0.00635
OG05243	transcript_HQ_North_transcript15588/f2p0/3842	transcript_HQ_South_transcript/6490/f6p0/3815	0	0	0.0084	NA	0.0042
OG05244	transcript_HQ_North_transcript46896/f2p0/789	transcript_HQ_South_transcript/47476/f47p0/791	1.04882	0.0187	0.0178	0.00935	0.0089
OG05247	transcript_HQ_North_transcript42781/f3p0/1825	transcript_HQ_South_transcript/33020/f12p0/1816	0.16069	0.0043	0.0268	0.0022	0.0134
OG05248	transcript_HQ_North_transcript40631/f2p0/2050	transcript_HQ_South_transcript/29847/f6p0/2012	0.70227	0.0058	0.0083	0.0029	0.00415
OG05250	transcript_HQ_North_transcript45914/f6p0/1339	transcript_HQ_South_transcript/41267/f25p0/1327	0.54854	0.0041	0.0076	0.00205	0.0038
OG05252	transcript_HQ_North_transcript35694/f3p0/2442	transcript_HQ_South_transcript/22570/f3p0/2465	0.27026	0.009	0.0331	0.0045	0.0166
OG05253	transcript_HQ_North_transcript20218/f4p0/3466	transcript_HQ_South_transcript/19777/f4p0/2627	0.04483	0.0017	0.0377	0.00085	0.01885
OG05254	transcript_HQ_North_transcript31307/f6p0/2637	transcript_HQ_South_transcript/19556/f7p0/2607	0.63051	0.0033	0.0052	0.00165	0.0026
OG05255	transcript_HQ_North_transcript3194/f2p0/5873	transcript_HQ_South_transcript/5259/f2p0/4017	0.09625	0.0007	0.0072	0.0003	0.0036
OG05256	transcript_HQ_North_transcript21206/f104p0/3368	transcript_HQ_South_transcript/9966/f11p0/3389	0.14198	0.0056	0.0397	0.00285	0.01985
OG05258	transcript_HQ_North_transcript587/f3p0/7205	transcript_HQ_South_transcript/12208/f2p0/3198	0.06836	0.0009	0.0128	0.0004	0.0064
OG05259	transcript_HQ_North_transcript18673/f50p0/3532	transcript_HQ_South_transcript/8721/f5p0/3522	0	0	0.0077	NA	0.0038
OG05261	transcript_HQ_North_transcript32905/f14p0/2619	transcript_HQ_South_transcript/19623/f25p0/2619	0.25603	0.0065	0.0255	0.00325	0.0128
OG05262	transcript_HQ_North_transcript15441/f5p0/3821	transcript_HQ_South_transcript/14449/f4p0/2996	0.09577	0.0018	0.0186	0.0009	0.0093
OG05266	transcript_HQ_North_transcript6069/f15p0/4982	transcript_HQ_South_transcript/2175/f4p0/4926	0.24468	0.0023	0.0094	0.00115	0.0047
OG05268	transcript_HQ_North_transcript39575/f2p0/2133	transcript_HQ_South_transcript/28913/f2p0/2105	0.77111	0.1279	0.1658	0.06395	0.0829
OG05269	transcript_HQ_North_transcript45421/f4p0/1427	transcript_HQ_South_transcript/39895/f2p0/1433	0.45786	0.004	0.0087	0.00205	0.0044
OG05270	transcript_HQ_North_transcript46426/f4p0/1199	transcript_HQ_South_transcript/42463/f6p0/1183	0.12986	0.0041	0.0313	0.00205	0.01565
OG05271	transcript_HQ_North_transcript7194/f3p0/4813	transcript_HQ_South_transcript/3000/f3p0/4595	0.07759	0.0015	0.0198	0.00075	0.0099
OG05272	transcript_HQ_North_transcript17910/f4p0/3619	transcript_HQ_South_transcript/6959/f3p0/3756	0.03812	0.002	0.053	0.001	0.02645
OG05273	transcript_HQ_North_transcript6323/f6p0/4942	transcript_HQ_South_transcript/3947/f4p0/4329	0	0	0.0151	NA	0.00755
OG05275	transcript_HQ_North_transcript45188/f22p0/1440	transcript_HQ_South_transcript/38704/f85p0/1443	1.63842	0.0048	0.0029	0.0024	0.00145
OG05277	transcript_HQ_North_transcript30877/f39p0/2735	transcript_HQ_South_transcript/16893/f23p0/2741	0.12699	0.0022	0.0174	0.0011	0.00865
OG05281	transcript_HQ_North_transcript35541/f3p0/2450	transcript_HQ_South_transcript/19838/f23p0/2574	0.15663	0.0055	0.0353	0.00275	0.01765
OG05282	transcript_HQ_North_transcript17534/f2p0/3665	transcript_HQ_South_transcript/7161/f2p0/3735	0.82263	0.0108	0.0132	0.0054	0.0066
OG05283	transcript_HQ_North_transcript41897/f5p0/1905	transcript_HQ_South_transcript/31423/f4p0/1930	0.23576	0.0077	0.0328	0.00385	0.0164
OG05284	transcript_HQ_North_transcript29132/f2p0/2884	transcript_HQ_South_transcript/16218/f2p0/2868	0	0	0.0135	NA	0.00675
OG05285	transcript_HQ_North_transcript11366/f2p0/4217	transcript_HQ_South_transcript/10972/f2p0/3302	0	0	0.0119	NA	0.00595
OG05286	transcript_HQ_North_transcript43901/f3p0/1685	transcript_HQ_South_transcript/25018/f2p0/2324	0.25031	0.0027	0.0109	0.00135	0.0055
OG05287	transcript_HQ_North_transcript44645/f19p0/1556	transcript_HQ_South_transcript/37495/f14p0/1557	0	0	0.0417	NA	0.0208
OG05288	transcript_HQ_North_transcript38953/f12p0/2144	transcript_HQ_South_transcript/11202/f3p0/3309	0	0	0.0138	NA	0.00685
OG05289	transcript_HQ_North_transcript5712/f3p0/5089	transcript_HQ_South_transcript/1915/f3p0/5092	0.26333	0.0019	0.0073	0.00095	0.00365
OG05291	transcript_HQ_North_transcript46744/f2p0/971	transcript_HQ_South_transcript/46189/f3p0/959	0	0	0.0771	NA	0.0386
OG05292	transcript_HQ_North_transcript45156/f17p0/1483	transcript_HQ_South_transcript/38770/f41p0/1463	0	0	0.0197	NA	0.00985
OG05295	transcript_HQ_North_transcript45570/f7p0/1408	transcript_HQ_South_transcript/40216/f44p0/1406	0.02955	0.0016	0.0542	0.0008	0.0271
OG05296	transcript_HQ_North_transcript40248/f3p0/2073	transcript_HQ_South_transcript/28999/f4p0/2070	0.37027	0.0037	0.0099	0.0018	0.005
OG05297	transcript_HQ_North_transcript28345/f13p0/2863	transcript_HQ_South_transcript/16242/f7p0/2857	0.15989	0.0014	0.0087	0.0007	0.00435
OG05298	transcript_HQ_North_transcript45637/f7p0/1403	transcript_HQ_South_transcript/40011/f37p0/1403	0	0	0.005	NA	0.0025
OG05301	transcript_HQ_North_transcript39624/f3p0/2133	transcript_HQ_South_transcript/28132/f7p0/2100	0.22665	0.0069	0.0303	0.0034	0.01515
OG05305	transcript_HQ_North_transcript45161/f5p0/1504	transcript_HQ_South_transcript/38618/f12p0/1497	0	0	0.0037	NA	0.00185
OG05306	transcript_HQ_North_transcript23981/f2p0/3195	transcript_HQ_South_transcript/12099/f2p0/3216	0.13267	0.0033	0.0248	0.00165	0.0124
OG05308	transcript_HQ_North_transcript35448/f4p0/2447	transcript_HQ_South_transcript/28646/f6p0/2077	0.04064	0.0015	0.0359	0.00075	0.01795
OG05309	transcript_HQ_North_transcript28148/f3p0/2940	transcript_HQ_South_transcript/31924/f15p0/1893	0	0	0.0086	NA	0.00425
OG05310	transcript_HQ_North_transcript42157/f6p0/1886	transcript_HQ_South_transcript/33218/f2p0/1893	0.22001	0.0028	0.0127	0.0014	0.00635
OG05313	transcript_HQ_North_transcript44585/f7p0/1573	transcript_HQ_South_transcript/37264/f6p0/1569	0.21455	0.0046	0.0213	0.00225	0.01065
OG05314	transcript_HQ_North_transcript46365/f3p0/1206	transcript_HQ_South_transcript/43336/f7p0/1190	0	0	0.0131	NA	0.00655
OG05315	transcript_HQ_North_transcript4396/f2p0/5426	transcript_HQ_South_transcript/32627/f16p0/1853	0.60133	0.0078	0.0129	0.00385	0.00645
OG05316	transcript_HQ_North_transcript7076/f15p0/4791	transcript_HQ_South_transcript/2528/f2p0/4807	NA	0	0	NA	NA
OG05317	transcript_HQ_North_transcript17657/f3p0/3665	transcript_HQ_South_transcript/11257/f2p0/3280	NA	0.003	0	0.0015	NA
OG05318	transcript_HQ_North_transcript12658/f3p0/4080	transcript_HQ_South_transcript/34706/f41p0/1730	0.24112	0.0034	0.0141	0.0017	0.00705
OG05322	transcript_HQ_North_transcript3948/f14p0/5521	transcript_HQ_South_transcript/4181/f5p0/4251	0.06106	0.0012	0.0191	0.0006	0.00955
OG05323	transcript_HQ_North_transcript45476/f24p0/1430	transcript_HQ_South_transcript/23513/f4p0/2381	0	0	0.011	NA	0.0055
OG05325	transcript_HQ_North_transcript39330/f7p0/2150	transcript_HQ_South_transcript/27761/f6p0/2120	0.25518	0.0007	0.0026	0.0003	0.00135
OG05327	transcript_HQ_North_transcript30992/f44p0/2733	transcript_HQ_South_transcript/1798/f2p0/5150	0	0	0.0268	NA	0.01335
OG05329	transcript_HQ_North_transcript29833/f17p0/2692	transcript_HQ_South_transcript/18349/f14p0/2689	0.17432	0.0013	0.0073	0.0006	0.00365
OG05330	transcript_HQ_North_transcript6453/f3p0/5015	transcript_HQ_South_transcript/21347/f2p0/2530	0.12316	0.0025	0.0202	0.00125	0.0101
OG05332	transcript_HQ_North_transcript3446/f30p0/5740	transcript_HQ_South_transcript/1087/f7p0/5741	0.09665	0.0022	0.0222	0.00105	0.01115
OG05335	transcript_HQ_North_transcript24427/f53p0/3129	transcript_HQ_South_transcript/12674/f7p0/3138	0	0	0.0026	NA	0.0013
OG05337	transcript_HQ_North_transcript46439/f2p0/1168	transcript_HQ_South_transcript/43703/f6p0/1164	0.02994	0.0013	0.0438	0.00065	0.02185
OG05339	transcript_HQ_North_transcript32623/f4p0/2649	transcript_HQ_South_transcript/19589/f4p0/2626	0	0	0.0201	NA	0.01
OG05341	transcript_HQ_North_transcript12025/f10p0/4119	transcript_HQ_South_transcript/4782/f3p0/4133	0.11023	0.0007	0.0059	0.0003	0.003
OG05342	transcript_LQ_North_transcript29289/f2p0/2838	transcript_HQ_South_transcript/16732/f26p0/2790	0.01597	0.0006	0.0401	0.0003	0.02005
OG05343	transcript_HQ_North_transcript27064/f5p0/2983	transcript_HQ_South_transcript/14649/f6p0/2987	0.06174	0.0004	0.0072	0.0002	0.0036
OG05344	transcript_HQ_North_transcript661/f49p0/7056	transcript_HQ_South_transcript/146/f3p0/7056	0.24049	0.0041	0.017	0.00205	0.0085
OG05346	transcript_HQ_North_transcript10327/f4p0/4294	transcript_HQ_South_transcript/21588/f16p0/2492	0.33221	0.004	0.0119	0.002	0.00595
OG05348	transcript_HQ_North_transcript46607/f10p0/1054	transcript_HQ_South_transcript/44050/f33p0/1012	NA	0.0024	0	0.0012	NA
OG05350	transcript_HQ_North_transcript38944/f5p0/2185	transcript_HQ_South_transcript/27005/f6p0/2184	0.04085	0.0013	0.0325	0.00065	0.0162
OG05353	transcript_HQ_North_transcript40610/f32p0/1985	transcript_HQ_South_transcript/29368/f41p0/1979	0	0	0.0059	NA	0.00295
OG05354	transcript_HQ_North_transcript5160/f11p0/5212	transcript_HQ_South_transcript/7479/f2p0/3691	0	0	0.0096	NA	0.00485
OG05355	transcript_HQ_North_transcript21677/f2p0/3353	transcript_HQ_South_transcript/10249/f6p0/3349	0	0	0.0058	NA	0.0029
OG05357	transcript_HQ_North_transcript46895/f6p0/791	transcript_HQ_South_transcript/46846/f2p0/910	NA	0	0	NA	NA
OG05358	transcript_HQ_North_transcript44228/f12p0/1613	transcript_HQ_South_transcript/34703/f6p0/1736	0	0	0.0124	NA	0.0062
OG05359	transcript_HQ_North_transcript34722/f7p0/2501	transcript_HQ_South_transcript/24871/f38p0/2310	0.02109	0.0013	0.0617	0.00065	0.03085
OG05360	transcript_HQ_North_transcript10451/f3p0/4311	transcript_HQ_South_transcript/5424/f2p0/4019	0	0	0.0117	NA	0.00585
OG05361	transcript_HQ_North_transcript23303/f28p0/3044	transcript_HQ_South_transcript/13385/f30p0/3069	0	0	0.0578	NA	0.02885
OG05362	transcript_HQ_North_transcript17065/f12p0/3668	transcript_HQ_South_transcript/6839/f6p0/3747	0.70298	0.0083	0.0117	0.0041	0.00585
OG05364	transcript_HQ_North_transcript8515/f2p0/4603	transcript_HQ_South_transcript/2741/f2p0/4704	0.17237	0.001	0.0059	0.00055	0.00295
OG05365	transcript_HQ_North_transcript10077/f6p0/4363	transcript_HQ_South_transcript/42576/f2p0/1248	NA	0	0	NA	NA
OG05367	transcript_HQ_North_transcript43053/f2p0/1801	transcript_HQ_South_transcript/34187/f6p0/1756	0	0	0.008	NA	0.00395
OG05368	transcript_HQ_North_transcript28482/f18p0/2909	transcript_HQ_South_transcript/15619/f11p0/2916	0.3158	0.0055	0.0174	0.00275	0.0087
OG05372	transcript_HQ_North_transcript40031/f2p0/2088	transcript_HQ_South_transcript/33961/f2p0/1787	0	0	0.0052	NA	0.0026
OG05375	transcript_HQ_North_transcript43421/f3p0/1751	transcript_HQ_South_transcript/34373/f5p0/1747	0.1487	0.0034	0.0231	0.0017	0.01155
OG05376	transcript_HQ_North_transcript1905/f3p0/6411	transcript_HQ_South_transcript/584/f3p0/6427	0	0	0.0129	NA	0.00645
OG05378	transcript_HQ_North_transcript5280/f31p0/5173	transcript_HQ_South_transcript/10059/f3p0/3392	0	0	0.0146	NA	0.0073
OG05379	transcript_HQ_North_transcript27919/f15p0/2901	transcript_HQ_South_transcript/966/f4p0/5910	NA	0	0	NA	NA
OG05380	transcript_HQ_North_transcript28541/f2p0/2911	transcript_HQ_South_transcript/15825/f2p0/2900	0.10144	0.0054	0.0528	0.0027	0.0264
OG05381	transcript_HQ_North_transcript33112/f5p0/2600	transcript_HQ_South_transcript/20198/f4p0/2559	0.21006	0.0051	0.0241	0.0025	0.01205
OG05382	transcript_HQ_North_transcript33510/f2p0/2595	transcript_HQ_South_transcript/23233/f351p0/2360	0.07403	0.0008	0.0113	0.00045	0.00565
OG05383	transcript_HQ_North_transcript46508/f5p0/1138	transcript_HQ_South_transcript/43653/f10p0/1139	0.71442	0.003	0.0041	0.0015	0.00205
OG05384	transcript_HQ_North_transcript36273/f2p0/2394	transcript_HQ_South_transcript/30400/f12p0/1914	0	0	0.0019	NA	0.00095
OG05385	transcript_HQ_North_transcript34254/f3p0/2544	transcript_HQ_South_transcript/19256/f3p0/2665	0.08285	0.0012	0.0147	0.0006	0.0073
OG05386	transcript_HQ_North_transcript44235/f7p0/1614	transcript_HQ_South_transcript/35722/f27p0/1611	0	0	0.0148	NA	0.00745
OG05387	transcript_HQ_North_transcript2454/f5p0/6197	transcript_HQ_South_transcript/2661/f4p0/4725	0.02875	0.0013	0.0469	0.0007	0.02345
OG05389	transcript_HQ_North_transcript41834/f2p0/1926	transcript_HQ_South_transcript/45911/f72p0/925	NA	0	0	NA	NA
OG05390	transcript_HQ_North_transcript42689/f4p0/1841	transcript_HQ_South_transcript/10140/f4p0/3409	0.14333	0.0022	0.0156	0.0011	0.00775
OG05391	transcript_HQ_North_transcript33304/f3p0/2588	transcript_HQ_South_transcript/20671/f4p0/2571	0	0	0.0015	NA	0.00075
OG05392	transcript_HQ_North_transcript7570/f2p0/4743	transcript_HQ_South_transcript/2665/f2p0/4741	0.12656	0.0024	0.0191	0.0012	0.00955
OG05393	transcript_HQ_North_transcript13532/f88p0/3841	transcript_HQ_South_transcript/5488/f26p0/3837	0.04235	0.0004	0.0095	0.0002	0.00475
OG05394	transcript_HQ_North_transcript46357/f11p0/1206	transcript_HQ_South_transcript/42289/f31p0/1206	0.20177	0.0039	0.0194	0.00195	0.0097
OG05395	transcript_HQ_North_transcript38615/f142p0/2145	transcript_HQ_South_transcript/26768/f386p0/2151	0.09899	0.0051	0.0513	0.00255	0.02565
OG05396	transcript_HQ_North_transcript13518/f2p0/4011	transcript_HQ_South_transcript/1934/f9p0/5070	0.09743	0.0037	0.0384	0.00185	0.01915
OG05399	transcript_HQ_North_transcript320/f2p0/7788	transcript_HQ_South_transcript/39527/f3p0/1456	0	0	0.0021	NA	0.001
OG05400	transcript_HQ_North_transcript17790/f5p0/3620	transcript_HQ_South_transcript/9572/f3p0/3453	0.29155	0.0004	0.0014	0.0002	0.0007
OG05401	transcript_HQ_North_transcript33972/f17p0/2529	transcript_HQ_South_transcript/20914/f7p0/2509	0.43834	0.0108	0.0247	0.0054	0.01235
OG05402	transcript_HQ_North_transcript46585/f4p0/1101	transcript_HQ_South_transcript/44431/f32p0/1074	0.15847	0.0018	0.0115	0.0009	0.00575
OG05403	transcript_HQ_North_transcript38857/f9p0/2179	transcript_HQ_South_transcript/27216/f2p0/2179	0.13001	0.0009	0.0069	0.00045	0.0034
OG05405	transcript_HQ_North_transcript46886/f4p0/805	transcript_HQ_South_transcript/47595/f16p0/825	0	0	0.0429	NA	0.02145
OG05407	transcript_HQ_North_transcript12126/f18p0/4089	transcript_HQ_South_transcript/4888/f2p0/4105	0.24996	0.0073	0.0293	0.00365	0.01465
OG05408	transcript_HQ_North_transcript34023/f15p0/2511	transcript_HQ_South_transcript/21647/f3p0/2518	0.39119	0.0095	0.0242	0.00475	0.0121
OG05409	transcript_HQ_North_transcript39915/f2p0/2101	transcript_HQ_South_transcript/28212/f2p0/2109	0	0	0.0228	NA	0.0114
OG05410	transcript_HQ_North_transcript42242/f4p0/1886	transcript_HQ_South_transcript/32243/f4p0/1890	0.08988	0.0053	0.0594	0.00265	0.0297
OG05411	transcript_HQ_North_transcript17663/f2p0/3644	transcript_HQ_South_transcript/28929/f12p0/2065	0.1535	0.0038	0.0245	0.0019	0.0123
OG05413	transcript_HQ_North_transcript46648/f4p0/1043	transcript_HQ_South_transcript/44940/f25p0/1019	0.16008	0.0052	0.0326	0.0026	0.0163
OG05415	transcript_HQ_North_transcript37944/f71p0/2231	transcript_HQ_South_transcript/25903/f121p0/2229	NA	0.0024	0	0.00115	NA
OG05418	transcript_HQ_North_transcript45262/f7p0/1482	transcript_HQ_South_transcript/39062/f8p0/1464	0.43537	0.0187	0.043	0.00935	0.0215
OG05419	transcript_HQ_North_transcript46621/f7p0/1047	transcript_HQ_South_transcript/44824/f22p0/1002	1.06332	0.0164	0.0154	0.0082	0.0077
OG05421	transcript_HQ_North_transcript5360/f2p0/5165	transcript_HQ_South_transcript/31379/f7p0/1917	0.23479	0.0085	0.0362	0.00425	0.0181
OG05424	transcript_HQ_North_transcript36205/f8p0/2380	transcript_HQ_South_transcript/23330/f5p0/2396	0.1729	0.0022	0.013	0.00115	0.00645
OG05425	transcript_HQ_North_transcript30625/f7p0/2748	transcript_HQ_South_transcript/39290/f2p0/1471	0.26252	0.0058	0.0223	0.0029	0.01115
OG05426	transcript_HQ_North_transcript45563/f2p0/1426	transcript_HQ_South_transcript/40155/f20p0/1402	0	0	0.0107	NA	0.00535
OG05427	transcript_HQ_North_transcript43704/f7p0/1696	transcript_HQ_South_transcript/35499/f3p0/1669	0.47589	0.003	0.0064	0.0015	0.0032
OG05428	transcript_HQ_North_transcript46121/f3p0/1288	transcript_HQ_South_transcript/42156/f10p0/1258	0	0	0.0092	NA	0.0046
OG05429	transcript_HQ_North_transcript33900/f11p0/2550	transcript_HQ_South_transcript/21195/f3p0/2548	0.34504	0.0142	0.0412	0.0071	0.0206
OG05430	transcript_HQ_North_transcript44686/f2p0/1589	transcript_HQ_South_transcript/36075/f5p0/1659	0	0	0.0082	NA	0.0041
OG05431	transcript_HQ_North_transcript10629/f49p0/4280	transcript_HQ_South_transcript/4033/f7p0/4296	0.01254	0.0005	0.0366	0.00025	0.01825
OG05432	transcript_HQ_North_transcript33569/f5p0/2569	transcript_HQ_South_transcript/21056/f4p0/2546	0.45824	0.063	0.1375	0.0315	0.0687
OG05434	transcript_HQ_North_transcript45623/f11p0/1389	transcript_HQ_South_transcript/40136/f4p0/1412	0	0	0.0128	NA	0.00635
OG05437	transcript_HQ_North_transcript34099/f23p0/2493	transcript_HQ_South_transcript/21301/f26p0/2483	0.09768	0.0033	0.0335	0.00165	0.01675
OG05439	transcript_HQ_North_transcript41267/f2p0/1989	transcript_HQ_South_transcript/28488/f2p0/2092	0	0	0.0435	NA	0.02175
OG05441	transcript_HQ_North_transcript21608/f65p0/3209	transcript_HQ_South_transcript/11086/f7p0/3283	0.14782	0.0046	0.0313	0.0023	0.01565
OG05442	transcript_HQ_North_transcript29048/f2p0/2883	transcript_HQ_South_transcript/17358/f2p0/2890	NA	0.0008	0	0.0004	NA
OG05443	transcript_HQ_North_transcript21695/f2p0/3353	transcript_HQ_South_transcript/10534/f3p0/3366	0.11334	0.0019	0.017	0.00095	0.0085
OG05445	transcript_HQ_North_transcript39236/f2p0/2178	transcript_HQ_South_transcript/27366/f2p0/2219	0.32968	0.0099	0.0301	0.00495	0.01505
OG05447	transcript_HQ_North_transcript4073/f4p0/5513	transcript_HQ_South_transcript/1380/f2p0/5486	0.10417	0.0016	0.0153	0.0008	0.00765
OG05449	transcript_HQ_North_transcript44415/f4p0/1572	transcript_HQ_South_transcript/37682/f3p0/1568	0.50858	0.0035	0.0069	0.00175	0.00345
OG05450	transcript_HQ_North_transcript34315/f2p0/2528	transcript_HQ_South_transcript/23056/f2p0/2433	0	0	0.0191	NA	0.00955
OG05451	transcript_HQ_North_transcript43125/f4p0/1794	transcript_HQ_South_transcript/33957/f2p0/1798	0.0693	0.0015	0.0216	0.00075	0.0108
OG05452	transcript_HQ_North_transcript45515/f25p0/1425	transcript_HQ_South_transcript/38454/f90p0/1424	0.05441	0.0009	0.0169	0.0005	0.00845
OG05453	transcript_HQ_North_transcript34611/f3p0/2509	transcript_HQ_South_transcript/21699/f4p0/2502	0	0	0.0088	NA	0.0044
OG05454	transcript_HQ_North_transcript28202/f3p0/2978	transcript_HQ_South_transcript/21788/f5p0/2469	0	0	0.018	NA	0.00905
OG05456	transcript_HQ_North_transcript36504/f7p0/2347	transcript_HQ_South_transcript/23899/f7p0/2338	0.24345	0.0049	0.0202	0.00245	0.0101
OG05459	transcript_HQ_North_transcript23438/f4p0/3229	transcript_HQ_South_transcript/11679/f9p0/3226	0	0	0.0049	NA	0.0025
OG05460	transcript_HQ_North_transcript14775/f22p0/3868	transcript_HQ_South_transcript/37161/f2p0/1608	0.49869	0.0148	0.0296	0.0074	0.0148
OG05461	transcript_HQ_North_transcript42852/f4p0/1816	transcript_HQ_South_transcript/33464/f22p0/1769	0.05084	0.0019	0.0377	0.00095	0.0188
OG05462	transcript_HQ_North_transcript454/f2p0/7445	transcript_HQ_South_transcript/348/f4p0/6784	0.0864	0.0008	0.0094	0.0004	0.0047
OG05464	transcript_HQ_North_transcript27466/f32p0/2956	transcript_HQ_South_transcript/14277/f20p0/2967	0.06042	0.0044	0.0728	0.0022	0.0364
OG05465	transcript_HQ_North_transcript40750/f2p0/2037	transcript_HQ_South_transcript/21062/f2p0/2569	0	0	0.015	NA	0.00745
OG05468	transcript_HQ_North_transcript41079/f5p0/1505	transcript_HQ_South_transcript/30308/f2p0/1499	0.0743	0.0013	0.0172	0.00065	0.00855
OG05469	transcript_HQ_North_transcript27093/f3p0/3004	transcript_HQ_South_transcript/20644/f4p0/2569	0.04148	0.0016	0.0397	0.00085	0.0198
OG05470	transcript_HQ_North_transcript26389/f4p0/3036	transcript_HQ_South_transcript/24757/f2p0/2329	0.08955	0.0015	0.0163	0.00075	0.00815
OG05471	transcript_HQ_North_transcript39228/f5p0/2131	transcript_HQ_South_transcript/24058/f4p0/2375	0.22677	0.0023	0.0102	0.00115	0.0051
OG05472	transcript_HQ_North_transcript23476/f7p0/3213	transcript_HQ_South_transcript/11814/f2p0/3236	0.15812	0.0035	0.0221	0.00175	0.01105
OG05473	transcript_HQ_North_transcript37353/f17p0/2300	transcript_HQ_South_transcript/25119/f3p0/2300	0.03841	0.0017	0.0444	0.00085	0.0222
OG05474	transcript_HQ_North_transcript19885/f11p0/3442	transcript_HQ_South_transcript/22625/f4p0/2435	0	0	0.0159	NA	0.00795
OG05476	transcript_HQ_North_transcript5861/f3p0/5033	transcript_HQ_South_transcript/5751/f2p0/3938	0	0	0.0167	NA	0.00835
OG05478	transcript_HQ_North_transcript46190/f5p0/1259	transcript_HQ_South_transcript/42404/f10p0/1254	0.58459	0.0073	0.0124	0.00365	0.0062
OG05479	transcript_HQ_North_transcript46580/f2p0/1115	transcript_HQ_South_transcript/30998/f2p0/1963	0	0	0.0026	NA	0.0013
OG05480	transcript_HQ_North_transcript45481/f20p0/1419	transcript_HQ_South_transcript/39780/f97p0/1410	0.11916	0.0038	0.0315	0.00185	0.01575
OG05482	transcript_HQ_North_transcript18192/f2p0/3605	transcript_HQ_South_transcript/11399/f2p0/3263	NA	0	0	NA	NA
OG05483	transcript_HQ_North_transcript45673/f37p0/1320	transcript_HQ_South_transcript/40360/f87p0/1295	0	0	0.017	NA	0.0085
OG05484	transcript_HQ_North_transcript38331/f4p0/2237	transcript_HQ_South_transcript/30762/f4p0/1897	0	0	0.0282	NA	0.01415
OG05485	transcript_HQ_North_transcript35181/f2p0/2478	transcript_HQ_South_transcript/22019/f10p0/2477	0	0	0.0224	NA	0.0112
OG05486	transcript_HQ_North_transcript8671/f2p0/4577	transcript_HQ_South_transcript/13048/f16p0/3106	0	0	0.016	NA	0.00805
OG05488	transcript_HQ_North_transcript43617/f2p0/1727	transcript_HQ_South_transcript/35023/f2p0/1726	0	0	0.0087	NA	0.00435
OG05490	transcript_HQ_North_transcript10789/f5p0/4281	transcript_HQ_South_transcript/3823/f3p0/4295	0	0	0.0103	NA	0.00515
OG05491	transcript_HQ_North_transcript46312/f4p0/1225	transcript_HQ_South_transcript/43160/f13p0/1174	0.09507	0.0049	0.0514	0.00245	0.02575
OG05492	transcript_HQ_North_transcript42808/f4p0/1819	transcript_HQ_South_transcript/9244/f2p0/3482	0	0	0.006	NA	0.00305
OG05494	transcript_HQ_North_transcript31382/f53p0/2688	transcript_HQ_South_transcript/18037/f2p0/2758	0.25248	0.0075	0.0295	0.0037	0.01475
OG05495	transcript_HQ_North_transcript22163/f31p0/3268	transcript_HQ_South_transcript/11171/f27p0/3256	0.2617	0.003	0.0115	0.0015	0.00575
OG05498	transcript_HQ_North_transcript46678/f2p0/1037	transcript_HQ_South_transcript/46349/f2p0/970	0.29283	0.0028	0.0096	0.0014	0.0048
OG05499	transcript_HQ_North_transcript12570/f2p0/4075	transcript_HQ_South_transcript/2378/f2p0/4851	0.4417	0.0064	0.0145	0.0032	0.0072
OG05501	transcript_HQ_North_transcript20125/f5p0/3435	transcript_HQ_South_transcript/14263/f2p0/3012	0.09928	0.0031	0.0309	0.00155	0.01545
OG05502	transcript_HQ_North_transcript45234/f2p0/1490	transcript_HQ_South_transcript/38683/f2p0/1501	0.53106	0.0104	0.0195	0.0052	0.00975
OG05504	transcript_HQ_North_transcript37253/f3p0/2322	transcript_HQ_South_transcript/43872/f8p0/1142	1.31971	0.0066	0.005	0.0033	0.0025
OG05505	transcript_HQ_North_transcript39088/f14p0/2137	transcript_HQ_South_transcript/27848/f8p0/2135	NA	0	0	NA	NA
OG05506	transcript_HQ_North_transcript36390/f5p0/2381	transcript_HQ_South_transcript/23742/f4p0/2381	0.05757	0.0028	0.0486	0.0014	0.0243
OG05507	transcript_HQ_North_transcript44511/f3p0/1612	transcript_HQ_South_transcript/25274/f2p0/2293	0.02629	0.0015	0.0555	0.00075	0.0278
OG05511	transcript_HQ_North_transcript26015/f2p0/3075	transcript_HQ_South_transcript/18084/f4p0/2733	0	0	0.0172	NA	0.0086
OG05515	transcript_HQ_North_transcript43751/f2p0/1679	transcript_HQ_South_transcript/35438/f8p0/1683	NA	0.0107	0	0.00535	NA
OG05516	transcript_HQ_North_transcript37037/f9p0/2321	transcript_HQ_South_transcript/24441/f6p0/2332	NA	0.0023	0	0.00115	NA
OG05521	transcript_HQ_North_transcript45644/f3p0/1406	transcript_HQ_South_transcript/40322/f10p0/1381	0	0	0.0126	NA	0.0063
OG05524	transcript_HQ_North_transcript46948/f2p0/651	transcript_HQ_South_transcript/49503/f154p0/523	0	0	0.0191	NA	0.00955
OG05528	transcript_HQ_North_transcript21406/f39p0/3320	transcript_HQ_South_transcript/10403/f25p0/3322	3.59533	0.0042	0.0012	0.0021	0.0006
OG05530	transcript_HQ_North_transcript10943/f536p0/4090	transcript_HQ_South_transcript/4881/f74p0/4085	0.07182	0.0011	0.0153	0.00055	0.0077
OG05531	transcript_HQ_North_transcript20528/f2p0/3432	transcript_HQ_South_transcript/9370/f2p0/3474	0.0909	0.0009	0.0102	0.00045	0.0051
OG05532	transcript_HQ_North_transcript46409/f15p0/1173	transcript_HQ_South_transcript/43498/f17p0/1167	0.06419	0.0022	0.0339	0.0011	0.01695
OG05533	transcript_HQ_North_transcript46432/f2p0/1176	transcript_HQ_South_transcript/43545/f6p0/1168	NA	0	0	NA	NA
OG05534	transcript_HQ_North_transcript46718/f7p0/962	transcript_HQ_South_transcript/45960/f30p0/941	0	0	0.004	NA	0.002
OG05535	transcript_HQ_North_transcript45580/f3p0/1419	transcript_HQ_South_transcript/39678/f3p0/1438	0.21005	0.0043	0.0206	0.00215	0.0103
OG05536	transcript_HQ_North_transcript46184/f3p0/1276	transcript_HQ_South_transcript/42237/f72p0/1260	1.00038	0.0275	0.0275	0.0138	0.01375
OG05537	transcript_HQ_North_transcript40809/f2p0/2062	transcript_HQ_South_transcript/29150/f10p0/2030	0	0	0.0204	NA	0.0102
OG05538	transcript_HQ_North_transcript42485/f4p0/1845	transcript_HQ_South_transcript/32724/f18p0/1836	0.78082	0.0019	0.0024	0.00095	0.0012
OG05540	transcript_HQ_North_transcript2920/f28p0/5948	transcript_HQ_South_transcript/827/f5p0/5974	0.31287	0.0086	0.0276	0.00435	0.0138
OG05541	transcript_HQ_North_transcript24834/f61p0/3021	transcript_HQ_South_transcript/13248/f27p0/3038	0	0	0.0068	NA	0.0034
OG05542	transcript_HQ_North_transcript42379/f42p0/1814	transcript_HQ_South_transcript/32337/f107p0/1814	NA	0	0	NA	NA
OG05543	transcript_HQ_North_transcript44233/f28p0/1578	transcript_HQ_South_transcript/36475/f21p0/1612	0.12738	0.0023	0.0182	0.00115	0.0091
OG05545	transcript_HQ_North_transcript14058/f2p0/3950	transcript_HQ_South_transcript/12090/f2p0/3202	1.05887	0.011	0.0104	0.0055	0.0052
OG05548	transcript_HQ_North_transcript34981/f2p0/2498	transcript_HQ_South_transcript/18705/f3p0/2694	0.09387	0.0045	0.0484	0.0023	0.0242
OG05549	transcript_HQ_North_transcript33627/f21p0/2554	transcript_HQ_South_transcript/20696/f3p0/2565	5.54875	0.0011	0.0002	0.00055	0.0001
OG05550	transcript_HQ_North_transcript39738/f5p0/2107	transcript_HQ_South_transcript/27939/f3p0/2126	0.15926	0.0024	0.0152	0.0012	0.0076
OG05551	transcript_HQ_North_transcript6278/f37p0/4761	transcript_HQ_South_transcript/2480/f4p0/4785	0.08092	0.0015	0.0184	0.00075	0.0092
OG05553	transcript_HQ_North_transcript45773/f10p0/1367	transcript_HQ_South_transcript/40929/f5p0/1368	NA	0	0	NA	NA
OG05554	transcript_HQ_North_transcript33106/f2p0/2615	transcript_HQ_South_transcript/23411/f6p0/2385	0.1894	0.0021	0.0112	0.00105	0.0056
OG05555	transcript_HQ_North_transcript16959/f13p0/3676	transcript_HQ_South_transcript/7659/f3p0/3701	0.24667	0.008	0.0323	0.004	0.01615
OG05558	transcript_HQ_North_transcript40924/f10p0/1998	transcript_HQ_South_transcript/29748/f27p0/1995	0.24395	0.0061	0.0252	0.00305	0.0126
OG05559	transcript_HQ_North_transcript43837/f8p0/1676	transcript_HQ_South_transcript/35596/f15p0/1685	0.04659	0.0009	0.0202	0.00045	0.0101
OG05561	transcript_HQ_North_transcript45484/f3p0/1421	transcript_HQ_South_transcript/40806/f4p0/1368	0.44478	0.0014	0.0031	0.0007	0.00155
OG05562	transcript_HQ_North_transcript36516/f64p0/2343	transcript_HQ_South_transcript/18690/f2p0/2696	0.10774	0.0039	0.036	0.00195	0.01805
OG05563	transcript_HQ_North_transcript8035/f43p0/4612	transcript_HQ_South_transcript/2932/f5p0/4615	0.03602	0.001	0.0284	0.0005	0.0142
OG05565	transcript_HQ_North_transcript43866/f5p0/1693	transcript_HQ_South_transcript/35847/f4p0/1681	0.15377	0.0077	0.0501	0.00385	0.02505
OG05566	transcript_HQ_North_transcript46821/f3p0/911	transcript_HQ_South_transcript/46430/f27p0/882	0.27297	0.005	0.0182	0.0025	0.0091
OG05569	transcript_HQ_North_transcript39918/f17p0/2073	transcript_HQ_South_transcript/28572/f36p0/2067	0.49613	0.0009	0.0019	0.00045	0.00095
OG05570	transcript_HQ_North_transcript22603/f3p0/3280	transcript_HQ_South_transcript/12147/f4p0/3177	0.09851	0.0086	0.0869	0.0043	0.04345
OG05572	transcript_HQ_North_transcript18830/f44p0/3500	transcript_HQ_South_transcript/8777/f6p0/3504	0.18567	0.0039	0.0213	0.00195	0.01065
OG05573	transcript_HQ_North_transcript44900/f7p0/1531	transcript_HQ_South_transcript/38045/f19p0/1526	0.64382	0.0159	0.0248	0.00795	0.01235
OG05574	transcript_HQ_North_transcript37926/f14p0/2242	transcript_HQ_South_transcript/25514/f106p0/2238	0	0	0.016	NA	0.008
OG05575	transcript_HQ_North_transcript45346/f11p0/1432	transcript_HQ_South_transcript/39478/f62p0/1399	0.09847	0.0023	0.0231	0.00115	0.01155
OG05576	transcript_HQ_North_transcript36063/f2p0/2413	transcript_HQ_South_transcript/23209/f2p0/2424	0.11666	0.0019	0.0162	0.00095	0.00805
OG05577	transcript_HQ_North_transcript21583/f11p0/3346	transcript_HQ_South_transcript/10608/f7p0/3333	0.21912	0.0061	0.028	0.00305	0.014
OG05578	transcript_HQ_North_transcript21452/f20p0/3355	transcript_HQ_South_transcript/10284/f53p0/3363	0	0	0.033	NA	0.0165
OG05579	transcript_HQ_North_transcript19567/f2p0/3496	transcript_HQ_South_transcript/9162/f5p0/3494	0.05242	0.0004	0.0083	0.0002	0.0042
OG05580	transcript_HQ_North_transcript5347/f21p0/5133	transcript_HQ_South_transcript/5482/f2p0/3985	0	0	0.0404	NA	0.0202
OG05582	transcript_HQ_North_transcript18719/f10p0/3549	transcript_HQ_South_transcript/8740/f19p0/3545	0.0748	0.0007	0.0095	0.00035	0.0047
OG05583	transcript_HQ_North_transcript42971/f12p0/1780	transcript_HQ_South_transcript/5145/f11p0/4036	0	0	0.0037	NA	0.00185
OG05584	transcript_HQ_North_transcript3301/f5p0/5832	transcript_HQ_South_transcript/1135/f2p0/5686	0.07523	0.0016	0.0214	0.0008	0.0107
OG05588	transcript_HQ_North_transcript33915/f38p0/2518	transcript_HQ_South_transcript/20877/f32p0/2498	0.10413	0.0006	0.0061	0.0003	0.00305
OG05589	transcript_HQ_North_transcript10719/f29p0/4246	transcript_HQ_South_transcript/4115/f3p0/4273	0.16235	0.0033	0.0206	0.00165	0.0103
OG05590	transcript_HQ_North_transcript43301/f5p0/1765	transcript_HQ_South_transcript/34224/f8p0/1765	0	0	0.0042	NA	0.0021
OG05591	transcript_HQ_North_transcript44231/f4p0/1639	transcript_HQ_South_transcript/29556/f4p0/2040	0.07697	0.0017	0.0218	0.00085	0.01095
OG05593	transcript_HQ_North_transcript43215/f5p0/1775	transcript_HQ_South_transcript/34691/f4p0/1771	0.05973	0.0011	0.0187	0.00055	0.00935
OG05596	transcript_HQ_North_transcript35800/f2p0/2423	transcript_HQ_South_transcript/39576/f2p0/1469	0.10565	0.0011	0.0105	0.00055	0.00525
OG05597	transcript_HQ_North_transcript42810/f48p0/1767	transcript_HQ_South_transcript/33572/f2p0/1775	0	0	0.0056	NA	0.00275
OG05598	transcript_HQ_North_transcript32508/f2p0/2653	transcript_HQ_South_transcript/14172/f3p0/3032	0.05777	0.0025	0.0436	0.00125	0.02185
OG05599	transcript_HQ_North_transcript7700/f3p0/4722	transcript_HQ_South_transcript/3573/f4p0/4422	0.27529	0.0045	0.0163	0.00225	0.00815
OG05601	transcript_HQ_North_transcript45746/f3p0/1382	transcript_HQ_South_transcript/40591/f31p0/1338	0.26302	0.0014	0.0052	0.0007	0.0026
OG05602	transcript_HQ_North_transcript46111/f10p0/1278	transcript_HQ_South_transcript/41493/f21p0/1242	NA	0.003	0	0.0015	NA
OG05604	transcript_HQ_North_transcript46081/f3p0/1291	transcript_HQ_South_transcript/41753/f2p0/1301	0	0	0.0033	NA	0.00165
OG05605	transcript_HQ_North_transcript682/f3p0/7035	transcript_HQ_South_transcript/6303/f2p0/3903	0.10709	0.0012	0.0116	0.00065	0.0058
OG05608	transcript_HQ_North_transcript40438/f2p0/2067	transcript_HQ_South_transcript/29514/f11p0/2006	0.81348	0.003	0.0037	0.0015	0.0018
OG05609	transcript_HQ_North_transcript21981/f3p0/3319	transcript_HQ_South_transcript/4327/f2p0/4229	0.02141	0.0007	0.0327	0.00035	0.01635
OG05610	transcript_HQ_North_transcript35061/f33p0/2466	transcript_HQ_South_transcript/22773/f2p0/2441	0.01899	0.0016	0.0853	0.0008	0.04265
OG05611	transcript_HQ_North_transcript5164/f11p0/5215	transcript_HQ_South_transcript/8354/f4p0/3572	0.15015	0.0025	0.0165	0.00125	0.0082
OG05612	transcript_HQ_North_transcript46898/f3p0/790	transcript_LQ_South_transcript/46952/f2p0/908	NA	0.0251	0	0.0125	NA
OG05613	transcript_HQ_North_transcript44669/f2p0/1579	transcript_HQ_South_transcript/37743/f3p0/1575	0.6602	0.0109	0.0165	0.00545	0.00825
OG05614	transcript_HQ_North_transcript7410/f4p0/4746	transcript_HQ_South_transcript/29218/f2p0/2061	0.09694	0.001	0.0105	0.0005	0.00525
OG05615	transcript_HQ_North_transcript5874/f5p0/5051	transcript_HQ_South_transcript/20724/f3p0/2533	0	0	0.0177	NA	0.00885
OG05616	transcript_HQ_North_transcript43644/f8p0/1715	transcript_HQ_South_transcript/34888/f11p0/1710	1.12485	0.0034	0.003	0.0017	0.0015
OG05620	transcript_HQ_North_transcript414/f21p0/7484	transcript_HQ_South_transcript/92/f6p0/7483	0	0	0.0073	NA	0.00365
OG05621	transcript_HQ_North_transcript2016/f21p0/6311	transcript_HQ_South_transcript/605/f7p0/6338	0.07218	0.0018	0.0243	0.00085	0.01215
OG05622	transcript_HQ_North_transcript44529/f5p0/1599	transcript_HQ_South_transcript/37143/f5p0/1599	0	0	0.0063	NA	0.00315
OG05623	transcript_HQ_North_transcript27499/f2p0/2980	transcript_HQ_South_transcript/14633/f2p0/2994	0.64762	0.0061	0.0095	0.00305	0.0047
OG05624	transcript_HQ_North_transcript33594/f3p0/2582	transcript_HQ_South_transcript/19313/f2p0/2667	0.01484	0.0009	0.062	0.00045	0.031
OG05625	transcript_HQ_North_transcript4588/f8p0/5371	transcript_HQ_South_transcript/1542/f3p0/5363	0	0	0.0135	NA	0.0067
OG05626	transcript_HQ_North_transcript11798/f3p0/4173	transcript_HQ_South_transcript/1248/f2p0/5596	0	0	0.0041	NA	0.00205
OG05627	transcript_HQ_North_transcript26625/f4p0/3031	transcript_HQ_South_transcript/26482/f11p0/2177	0.03452	0.0013	0.0382	0.00065	0.01905
OG05628	transcript_HQ_North_transcript30859/f84p0/2715	transcript_HQ_South_transcript/18055/f28p0/2732	0.23787	0.0022	0.0092	0.0011	0.0046
OG05629	transcript_HQ_North_transcript15549/f7p0/3801	transcript_HQ_South_transcript/6597/f4p0/3799	NA	0.0012	0	0.00055	NA
OG05630	transcript_HQ_North_transcript44243/f6p0/1633	transcript_HQ_South_transcript/35894/f16p0/1597	0.18785	0.0011	0.0056	0.00055	0.0028
OG05634	transcript_HQ_North_transcript46247/f3p0/1248	transcript_HQ_South_transcript/41631/f18p0/1240	0	0	0.0047	NA	0.00235
OG05635	transcript_HQ_North_transcript45420/f2p0/1450	transcript_HQ_South_transcript/39410/f12p0/1439	0.08812	0.0038	0.0428	0.00185	0.0214
OG05636	transcript_HQ_North_transcript30586/f3p0/2779	transcript_HQ_South_transcript/44080/f7p0/1121	0	0	0.0137	NA	0.00685
OG05638	transcript_HQ_North_transcript13120/f42p0/3943	transcript_HQ_South_transcript/5662/f7p0/3964	0.09524	0.0011	0.0114	0.0005	0.0057
OG05639	transcript_HQ_North_transcript11021/f48p0/4196	transcript_HQ_South_transcript/8016/f4p0/3623	0	0	0.0162	NA	0.0081
OG05640	transcript_HQ_North_transcript38625/f10p0/2163	transcript_HQ_South_transcript/25110/f2p0/2303	0.30964	0.0042	0.0135	0.0021	0.00675
OG05641	transcript_HQ_North_transcript12229/f2p0/4137	transcript_HQ_South_transcript/4801/f2p0/4128	0.16862	0.0043	0.0253	0.0021	0.01265
OG05642	transcript_HQ_North_transcript46220/f44p0/1230	transcript_HQ_South_transcript/42485/f138p0/1226	0.38783	0.0057	0.0148	0.00285	0.0074
OG05643	transcript_HQ_North_transcript46083/f2p0/1300	transcript_HQ_South_transcript/42428/f2p0/1273	0	0	0.0065	NA	0.00325
OG05645	transcript_HQ_North_transcript46347/f3p0/1212	transcript_HQ_South_transcript/43087/f13p0/1207	0.09068	0.0014	0.0157	0.00075	0.00785
OG05646	transcript_HQ_North_transcript29862/f3p0/2848	transcript_HQ_South_transcript/21859/f10p0/2416	0.12464	0.0019	0.015	0.0009	0.00745
OG05647	transcript_HQ_North_transcript42718/f2p0/1835	transcript_HQ_South_transcript/33190/f2p0/1822	0.2287	0.0069	0.0301	0.00345	0.01505
OG05650	transcript_HQ_North_transcript17333/f44p0/3605	transcript_HQ_South_transcript/7985/f16p0/3607	0.22234	0.0022	0.0097	0.0011	0.00485
OG05653	transcript_HQ_North_transcript35487/f8p0/2429	transcript_HQ_South_transcript/22562/f5p0/2440	0.99026	0.0051	0.0052	0.00255	0.0026
OG05655	transcript_HQ_North_transcript38359/f3p0/2240	transcript_HQ_South_transcript/25961/f7p0/2247	0.27657	0.0024	0.0088	0.00125	0.0044
OG05656	transcript_HQ_North_transcript12668/f3p0/4076	transcript_HQ_South_transcript/2267/f2p0/4900	0.19707	0.0045	0.023	0.0023	0.0115
OG05657	transcript_HQ_North_transcript29517/f19p0/2831	transcript_HQ_South_transcript/16706/f3p0/2833	0.04716	0.0015	0.0326	0.00075	0.0163
OG05659	transcript_HQ_North_transcript40531/f3p0/2057	transcript_HQ_South_transcript/15043/f2p0/3023	0.25003	0.0013	0.0052	0.00065	0.00255
OG05660	transcript_HQ_North_transcript42817/f8p0/1805	transcript_HQ_South_transcript/7919/f2p0/3640	0	0	0.0243	NA	0.01215
OG05661	transcript_HQ_North_transcript40409/f22p0/2007	transcript_HQ_South_transcript/29942/f23p0/2008	0	0	0.0206	NA	0.0103
OG05662	transcript_HQ_North_transcript44877/f4p0/1545	transcript_HQ_South_transcript/37768/f46p0/1527	0.07896	0.0011	0.014	0.00055	0.00705
OG05663	transcript_HQ_North_transcript13884/f46p0/3883	transcript_HQ_South_transcript/6025/f7p0/3885	0.63349	0.0074	0.0116	0.0037	0.0058
OG05665	transcript_HQ_North_transcript42814/f12p0/1776	transcript_HQ_South_transcript/33967/f32p0/1764	0.13711	0.0027	0.0196	0.00135	0.0098
OG05666	transcript_HQ_North_transcript9852/f4p0/4400	transcript_HQ_South_transcript/3334/f10p0/4403	0.07142	0.0016	0.0228	0.0008	0.0114
OG05667	transcript_HQ_North_transcript31696/f6p0/2704	transcript_HQ_South_transcript/37781/f8p0/1548	0	0	0.0027	NA	0.00135
OG05668	transcript_HQ_North_transcript36040/f26p0/2393	transcript_HQ_South_transcript/23380/f21p0/2388	0	0	0.0372	NA	0.0186
OG05669	transcript_HQ_North_transcript35623/f11p0/2434	transcript_HQ_South_transcript/22845/f6p0/2435	0.09706	0.0007	0.0076	0.00035	0.00385
OG05670	transcript_HQ_North_transcript46889/f3p0/803	transcript_HQ_South_transcript/47594/f229p0/798	0.15126	0.0032	0.0214	0.0016	0.01065
OG05671	transcript_HQ_North_transcript27986/f18p0/2929	transcript_HQ_South_transcript/15377/f2p0/2952	0.99592	0.0037	0.0037	0.00185	0.00185
OG05672	transcript_HQ_North_transcript46020/f2p0/1317	transcript_HQ_South_transcript/43349/f3p0/1192	0	0	0.0085	NA	0.00425
OG05673	transcript_HQ_North_transcript2983/f2p0/5937	transcript_HQ_South_transcript/1118/f2p0/5926	0.14469	0.0029	0.0201	0.00145	0.01005
OG05674	transcript_HQ_North_transcript35776/f2p0/2433	transcript_HQ_South_transcript/22871/f8p0/2396	0	0	0.0273	NA	0.0137
OG05676	transcript_HQ_North_transcript11166/f9p0/4222	transcript_HQ_South_transcript/4275/f2p0/4258	NA	0.0036	0	0.0018	NA
OG05677	transcript_HQ_North_transcript19072/f7p0/3521	transcript_HQ_South_transcript/8989/f2p0/3536	0	0	0.0599	NA	0.02995
OG05679	transcript_HQ_North_transcript8993/f5p0/4500	transcript_HQ_South_transcript/5325/f13p0/4006	0	0	0.0028	NA	0.00135
OG05680	transcript_HQ_North_transcript3031/f14p0/5891	transcript_HQ_South_transcript/979/f2p0/5899	0.09994	0.0021	0.0209	0.00105	0.01045
OG05681	transcript_HQ_North_transcript42135/f2p0/1901	transcript_HQ_South_transcript/31411/f6p0/1915	NA	0.0149	0	0.0074	NA
OG05683	transcript_HQ_North_transcript35669/f2p0/2434	transcript_HQ_South_transcript/38824/f2p0/1496	1.0869	0.0024	0.0022	0.0012	0.0011
OG05686	transcript_HQ_North_transcript35099/f4p0/2472	transcript_HQ_South_transcript/6336/f2p0/3878	0.29552	0.0009	0.0031	0.00045	0.00155
OG05687	transcript_HQ_North_transcript21020/f2p0/3391	transcript_HQ_South_transcript/6000/f4p0/3902	0.09287	0.0008	0.0082	0.0004	0.0041
OG05688	transcript_HQ_North_transcript25734/f2p0/3083	transcript_HQ_South_transcript/7078/f2p0/3734	0.02327	0.0006	0.0269	0.0003	0.01345
OG05689	transcript_HQ_North_transcript44982/f5p0/1529	transcript_HQ_South_transcript/38460/f4p0/1509	0.02011	0.0016	0.078	0.00075	0.039
OG05690	transcript_HQ_North_transcript35529/f2p0/2448	transcript_HQ_South_transcript/17252/f2p0/2809	0	0	0.0078	NA	0.0039
OG05691	transcript_HQ_North_transcript26170/f14p0/2878	transcript_HQ_South_transcript/15479/f3p0/2926	0.41459	0.0028	0.0068	0.0014	0.0034
OG05693	transcript_HQ_North_transcript28494/f20p0/2888	transcript_HQ_South_transcript/15749/f26p0/2893	0.14859	0.0026	0.0173	0.0013	0.0087
OG05694	transcript_HQ_North_transcript45394/f3p0/1469	transcript_HQ_South_transcript/39258/f8p0/1453	NA	0.0011	0	0.00055	NA
OG05697	transcript_HQ_North_transcript11316/f11p0/4190	transcript_HQ_South_transcript/4364/f6p0/4207	0.10548	0.0014	0.0134	0.0007	0.00675
OG05700	transcript_HQ_North_transcript42498/f2p0/1857	transcript_HQ_South_transcript/35081/f3p0/1724	0.42211	0.0056	0.0133	0.0028	0.00665
OG05701	transcript_HQ_North_transcript25467/f3p0/3113	transcript_HQ_South_transcript/15856/f12p0/2887	0	0	0.0278	NA	0.01385
OG05702	transcript_HQ_North_transcript43146/f2p0/1792	transcript_HQ_South_transcript/33843/f8p0/1750	0.04015	0.0019	0.0464	0.0009	0.0232
OG05705	transcript_HQ_North_transcript20820/f2p0/3416	transcript_HQ_South_transcript/12839/f12p0/3124	0.1458	0.0018	0.0125	0.00095	0.00625
OG05707	transcript_HQ_North_transcript14782/f18p0/3838	transcript_HQ_South_transcript/6224/f4p0/3870	0.36148	0.0093	0.0257	0.0046	0.0128
OG05708	transcript_HQ_North_transcript39859/f14p0/2100	transcript_HQ_South_transcript/16993/f4p0/2810	0.09563	0.0034	0.0359	0.0017	0.01795
OG05710	transcript_HQ_North_transcript10159/f14p0/4292	transcript_HQ_South_transcript/3519/f2p0/4430	0	0	0.0229	NA	0.01145
OG05711	transcript_HQ_North_transcript45381/f11p0/1404	transcript_HQ_South_transcript/39252/f50p0/1378	0.05001	0.003	0.0598	0.0015	0.0299
OG05712	transcript_HQ_North_transcript2957/f4p0/5937	transcript_HQ_South_transcript/2328/f2p0/4891	0.09443	0.0035	0.0368	0.00175	0.0184
OG05713	transcript_HQ_North_transcript21536/f270p0/3235	transcript_HQ_South_transcript/11612/f34p0/3238	0	0	0.005	NA	0.0025
OG05716	transcript_HQ_North_transcript46379/f2p0/1201	transcript_HQ_South_transcript/42766/f17p0/1196	0.20857	0.0055	0.0263	0.00275	0.01315
OG05717	transcript_HQ_North_transcript31661/f4p0/2722	transcript_HQ_South_transcript/14248/f2p0/3047	0.33899	0.0093	0.0276	0.0047	0.01375
OG05718	transcript_HQ_North_transcript46644/f38p0/1019	transcript_HQ_South_transcript/44976/f195p0/1017	0.49612	0.0084	0.017	0.0042	0.0085
OG05719	transcript_HQ_North_transcript9393/f3p0/4464	transcript_HQ_South_transcript/3887/f3p0/4349	0.04649	0.0013	0.0286	0.0007	0.0143
OG05722	transcript_HQ_North_transcript39197/f7p0/2158	transcript_HQ_South_transcript/23922/f2p0/2373	0.13181	0.0049	0.0368	0.0024	0.01845
OG05723	transcript_HQ_North_transcript46063/f2p0/1302	transcript_HQ_South_transcript/41746/f2p0/1300	0.38589	0.0023	0.0061	0.00115	0.00305
OG05726	transcript_HQ_North_transcript3278/f2p0/5857	transcript_HQ_South_transcript/7703/f2p0/3689	0.1314	0.002	0.0152	0.001	0.0076
OG05727	transcript_HQ_North_transcript30544/f25p0/2739	transcript_HQ_South_transcript/18707/f2p0/2753	0.06727	0.001	0.0154	0.0005	0.0077
OG05730	transcript_HQ_North_transcript30136/f8p0/2798	transcript_HQ_South_transcript/17053/f3p0/2819	0	0	0.0279	NA	0.01395
OG05733	transcript_HQ_North_transcript1809/f5p0/6578	transcript_HQ_South_transcript/15674/f7p0/2893	0.08381	0.001	0.0117	0.0005	0.00585
OG05734	transcript_HQ_North_transcript41853/f3p0/1928	transcript_HQ_South_transcript/31847/f2p0/1923	0	0	0.0091	NA	0.0045
OG05735	transcript_HQ_North_transcript41587/f3p0/1958	transcript_HQ_South_transcript/30660/f6p0/1954	0	0	0.0179	NA	0.00895
OG05737	transcript_HQ_North_transcript24335/f8p0/3157	transcript_HQ_South_transcript/48916/f4p0/716	NA	0	0	NA	NA
OG05738	transcript_HQ_North_transcript17331/f2p0/3684	transcript_HQ_South_transcript/3495/f6p0/4448	NA	0	0	NA	NA
OG05739	transcript_HQ_North_transcript14509/f2p0/3907	transcript_HQ_South_transcript/6117/f3p0/3890	0.03933	0.0012	0.0304	0.0006	0.0152
OG05740	transcript_HQ_North_transcript31704/f4p0/2697	transcript_HQ_South_transcript/39280/f2p0/1480	0.20054	0.0024	0.0122	0.0012	0.0061
OG05741	transcript_HQ_North_transcript4727/f2p0/5306	transcript_HQ_South_transcript/15036/f2p0/2953	0.06901	0.0006	0.0082	0.0003	0.0041
OG05743	transcript_HQ_North_transcript43131/f25p0/1730	transcript_HQ_South_transcript/34674/f25p0/1725	0.09696	0.001	0.0103	0.0005	0.0052
OG05744	transcript_HQ_North_transcript19739/f3p0/3491	transcript_HQ_South_transcript/25245/f2p0/2300	0.43025	0.0591	0.1375	0.0296	0.06875
OG05745	transcript_HQ_North_transcript8719/f2p0/4578	transcript_HQ_South_transcript/33905/f3p0/1899	0.06363	0.8507	13.3693	0.42535	6.68465
OG05747	transcript_HQ_North_transcript43917/f14p0/1666	transcript_HQ_South_transcript/35328/f79p0/1652	0	0	0.0025	NA	0.00125
OG05749	transcript_HQ_North_transcript46743/f2p0/991	transcript_HQ_South_transcript/45512/f40p0/966	0.12007	0.0016	0.0132	0.0008	0.0066
OG05750	transcript_HQ_North_transcript19403/f12p0/3495	transcript_HQ_South_transcript/9174/f5p0/3490	0.95316	0.0103	0.0108	0.0051	0.0054
OG05752	transcript_HQ_North_transcript2894/f4p0/5977	transcript_HQ_South_transcript/24890/f3p0/2320	0.48588	0.0062	0.0128	0.0031	0.0064
OG05753	transcript_HQ_North_transcript8558/f2p0/4598	transcript_HQ_South_transcript/15829/f7p0/2891	0.04315	0.0009	0.021	0.00045	0.0105
OG05756	transcript_HQ_North_transcript16695/f48p0/3690	transcript_HQ_South_transcript/7216/f27p0/3690	0.17511	0.0025	0.0145	0.0013	0.00725
OG05757	transcript_HQ_North_transcript45584/f4p0/1394	transcript_HQ_South_transcript/40386/f12p0/1381	0.97028	0.0087	0.009	0.00435	0.0045
OG05758	transcript_HQ_North_transcript37296/f4p0/2330	transcript_HQ_South_transcript/24713/f2p0/2321	1.02532	0.0037	0.0036	0.00185	0.0018
OG05762	transcript_HQ_North_transcript21128/f2p0/3427	transcript_HQ_South_transcript/25559/f10p0/2203	0.13036	0.0025	0.0189	0.00125	0.00945
OG05763	transcript_HQ_North_transcript43078/f7p0/1792	transcript_HQ_South_transcript/33809/f15p0/1787	0	0	0.0018	NA	0.0009
OG05765	transcript_HQ_North_transcript35894/f2p0/2421	transcript_HQ_South_transcript/24866/f2p0/2304	0.23999	0.0088	0.0365	0.0044	0.01825
OG05766	transcript_HQ_North_transcript33578/f5p0/2580	transcript_HQ_South_transcript/20944/f2p0/2565	0.32878	0.004	0.0121	0.002	0.00605
OG05768	transcript_HQ_North_transcript27701/f2p0/2958	transcript_HQ_South_transcript/19333/f8p0/2644	0	0	0.0102	NA	0.0051
OG05769	transcript_HQ_North_transcript21360/f41p0/3356	transcript_HQ_South_transcript/10414/f13p0/3351	0.0874	0.004	0.0455	0.002	0.02275
OG05770	transcript_HQ_North_transcript33333/f4p0/2562	transcript_HQ_South_transcript/20889/f2p0/2563	0.06148	0.0013	0.0208	0.00065	0.01035
OG05772	transcript_HQ_North_transcript34240/f2p0/2531	transcript_HQ_South_transcript/18624/f2p0/2726	0.02204	0.0012	0.0563	0.0006	0.0281
OG05774	transcript_HQ_North_transcript381/f17p0/7539	transcript_HQ_South_transcript/26714/f3p0/2217	0.05093	0.0009	0.0183	0.00045	0.00915
OG05775	transcript_HQ_North_transcript25032/f5p0/3133	transcript_HQ_South_transcript/16957/f2p0/2815	0.52531	0.0024	0.0046	0.0012	0.0023
OG05776	transcript_HQ_North_transcript27315/f2p0/2986	transcript_HQ_South_transcript/12602/f3p0/3157	NA	0	0	NA	NA
OG05778	transcript_HQ_North_transcript29220/f5p0/2843	transcript_HQ_South_transcript/32508/f30p0/1831	0.14927	0.0045	0.0298	0.0022	0.0149
OG05779	transcript_HQ_North_transcript33499/f10p0/2585	transcript_HQ_South_transcript/19705/f27p0/2581	0.04097	0.0013	0.0306	0.0006	0.0153
OG05780	transcript_HQ_North_transcript45213/f15p0/1487	transcript_HQ_South_transcript/12093/f2p0/3233	0.13562	0.0024	0.0177	0.0012	0.00885
OG05782	transcript_HQ_North_transcript21868/f22p0/3312	transcript_HQ_South_transcript/10945/f18p0/3306	0.06738	0.0043	0.0641	0.00215	0.0321
OG05784	transcript_HQ_North_transcript4120/f4p0/5498	transcript_HQ_South_transcript/1329/f2p0/5496	NA	0.0004	0	0.0002	NA
OG05786	transcript_HQ_North_transcript2299/f4p0/6258	transcript_HQ_South_transcript/28086/f9p0/2107	NA	0	0	NA	NA
OG05788	transcript_HQ_North_transcript20101/f2p0/3458	transcript_HQ_South_transcript/10125/f3p0/3383	0.009	0.0006	0.07	0.00035	0.035
OG05789	transcript_HQ_North_transcript45927/f24p0/1311	transcript_HQ_South_transcript/40262/f2p0/1314	0.11047	0.0019	0.0176	0.00095	0.0088
OG05790	transcript_HQ_North_transcript45202/f2p0/1496	transcript_HQ_South_transcript/42634/f2p0/1138	1.39244	0.0291	0.0209	0.01455	0.01045
OG05791	transcript_HQ_North_transcript44717/f9p0/1570	transcript_HQ_South_transcript/31311/f6p0/1930	0.9677	0.0046	0.0048	0.0023	0.0024
OG05795	transcript_HQ_North_transcript6109/f19p0/4969	transcript_HQ_South_transcript/1972/f2p0/5090	0.18972	0.0026	0.0139	0.00135	0.00695
OG05797	transcript_HQ_North_transcript11717/f2p0/4176	transcript_HQ_South_transcript/8803/f4p0/3560	0.13586	0.0035	0.026	0.00175	0.013
OG05798	transcript_HQ_North_transcript46817/f2p0/924	transcript_HQ_South_transcript/46594/f33p0/824	0	0	0.018	NA	0.009
OG05799	transcript_HQ_North_transcript23789/f14p0/3174	transcript_HQ_South_transcript/12183/f63p0/3171	0.25681	0.004	0.0157	0.00205	0.00785
OG05800	transcript_HQ_North_transcript34098/f37p0/2448	transcript_HQ_South_transcript/21885/f19p0/2462	0.2533	0.0041	0.0164	0.00205	0.0082
OG05804	transcript_HQ_North_transcript26324/f4p0/3042	transcript_HQ_South_transcript/14243/f2p0/3045	NA	0.0044	0	0.0022	NA
OG05805	transcript_HQ_North_transcript27993/f4p0/2948	transcript_HQ_South_transcript/15180/f4p0/2949	0.49309	0.0045	0.0091	0.00225	0.0046
OG05806	transcript_HQ_North_transcript9776/f37p0/4315	transcript_HQ_South_transcript/4018/f5p0/4305	0.05084	0.0011	0.0212	0.00055	0.0106
OG05809	transcript_HQ_North_transcript24901/f39p0/3088	transcript_HQ_South_transcript/12319/f6p0/3102	0	0	0.0143	NA	0.00715
OG05810	transcript_HQ_North_transcript21241/f9p0/3374	transcript_HQ_South_transcript/10166/f3p0/3392	0.45855	0.0107	0.0233	0.00535	0.01165
OG05812	transcript_HQ_North_transcript46900/f6p0/784	transcript_HQ_South_transcript/47446/f260p0/755	0	0	0.0042	NA	0.0021
OG05813	transcript_HQ_North_transcript42489/f5p0/1858	transcript_HQ_South_transcript/32636/f3p0/1878	0.07814	0.003	0.0383	0.0015	0.01915
OG05814	transcript_HQ_North_transcript45211/f2p0/1447	transcript_HQ_South_transcript/37716/f26p0/1552	0.08047	0.001	0.0125	0.0005	0.00625
OG05815	transcript_HQ_North_transcript37218/f3p0/2323	transcript_HQ_South_transcript/24917/f2p0/2310	0.10441	0.0029	0.0273	0.0014	0.01365
OG05816	transcript_HQ_North_transcript45939/f2p0/1357	transcript_HQ_South_transcript/30609/f2p0/1991	0	0	0.0301	NA	0.01505
OG05817	transcript_HQ_North_transcript44882/f9p0/1548	transcript_HQ_South_transcript/37525/f38p0/1544	NA	0	0	NA	NA
OG05818	transcript_HQ_North_transcript43168/f3p0/1772	transcript_HQ_South_transcript/32905/f14p0/1769	0.23821	0.0012	0.005	0.0006	0.0025
OG05819	transcript_HQ_North_transcript33960/f2p0/2591	transcript_HQ_South_transcript/10469/f2p0/3361	0.21508	0.0024	0.011	0.00115	0.0055
OG05821	transcript_HQ_North_transcript39998/f11p0/2082	transcript_HQ_South_transcript/28643/f12p0/2074	0	0	0.0119	NA	0.00595
OG05824	transcript_HQ_North_transcript40102/f10p0/2079	transcript_HQ_South_transcript/28506/f38p0/2069	0.4625	0.0092	0.0198	0.00455	0.0099
OG05826	transcript_HQ_North_transcript46188/f2p0/1274	transcript_HQ_South_transcript/41418/f15p0/1269	0	0	0.0361	NA	0.01805
OG05827	transcript_HQ_North_transcript43859/f2p0/1691	transcript_HQ_South_transcript/35509/f3p0/1704	0	0	0.0554	NA	0.02765
OG05828	transcript_HQ_North_transcript25601/f2p0/3090	transcript_HQ_South_transcript/30848/f2p0/1963	0.06144	0.0024	0.0383	0.0012	0.01915
OG05829	transcript_HQ_North_transcript43941/f14p0/1665	transcript_HQ_South_transcript/35448/f83p0/1611	0.20745	0.0049	0.0235	0.00245	0.01175
OG05830	transcript_HQ_North_transcript11397/f17p0/4186	transcript_HQ_South_transcript/4430/f10p0/4190	0	0	0.0111	NA	0.0055
OG05831	transcript_HQ_North_transcript41376/f4p0/1966	transcript_HQ_South_transcript/30324/f33p0/1964	0.25829	0.0018	0.007	0.0009	0.0035
OG05832	transcript_HQ_North_transcript38819/f4p0/2174	transcript_HQ_South_transcript/26919/f2p0/2200	0.11765	0.0043	0.0363	0.00215	0.01815
OG05833	transcript_HQ_North_transcript14275/f2p0/3943	transcript_HQ_South_transcript/9329/f20p0/3442	0.2388	0.005	0.0211	0.0025	0.01055
OG05834	transcript_HQ_North_transcript5329/f2p0/5179	transcript_HQ_South_transcript/14872/f6p0/2967	0.23579	0.0022	0.0095	0.0011	0.0047
OG05835	transcript_HQ_North_transcript19701/f10p0/3466	transcript_HQ_South_transcript/9172/f6p0/3460	0.24698	0.0061	0.0249	0.0031	0.01245
OG05837	transcript_HQ_North_transcript38452/f2p0/2242	transcript_HQ_South_transcript/26527/f3p0/2213	0.43446	0.005	0.0116	0.0025	0.00575
OG05838	transcript_HQ_North_transcript43888/f4p0/1648	transcript_HQ_South_transcript/27467/f2p0/2151	0.20065	0.0224	0.1115	0.0112	0.0557
OG05839	transcript_HQ_North_transcript30073/f4p0/2810	transcript_HQ_South_transcript/16942/f5p0/2814	0	0	0.0024	NA	0.00125
OG05840	transcript_HQ_North_transcript23167/f2p0/3244	transcript_HQ_South_transcript/25216/f4p0/2291	0.19975	0.0032	0.0158	0.0016	0.0079
OG05841	transcript_HQ_North_transcript89/f4p0/8972	transcript_HQ_South_transcript/30975/f2p0/1956	0	0	0.0103	NA	0.00515
OG05842	transcript_HQ_North_transcript4201/f2p0/5547	transcript_HQ_South_transcript/11948/f2p0/3248	0	0	0.003	NA	0.0015
OG05844	transcript_HQ_North_transcript43119/f3p0/1784	transcript_HQ_South_transcript/46709/f4p0/906	0.18977	0.0038	0.02	0.0019	0.01005
OG05845	transcript_HQ_North_transcript46834/f2p0/896	transcript_HQ_South_transcript/48545/f2p0/772	0	0	0.011	NA	0.0055
OG05847	transcript_HQ_North_transcript32410/f19p0/2658	transcript_HQ_South_transcript/19493/f4p0/2643	0.54374	0.0032	0.0059	0.0016	0.00295
OG05848	transcript_HQ_North_transcript45023/f3p0/1533	transcript_HQ_South_transcript/38083/f13p0/1531	0.30129	0.0015	0.0049	0.00075	0.00245
OG05849	transcript_HQ_North_transcript10226/f3p0/4355	transcript_HQ_South_transcript/3894/f3p0/4352	0.18669	0.0012	0.0062	0.0006	0.0031
OG05851	transcript_HQ_North_transcript37106/f2p0/2336	transcript_HQ_South_transcript/21266/f14p0/2482	0.01858	0.0008	0.0438	0.00045	0.0219
OG05852	transcript_HQ_North_transcript43391/f2p0/1761	transcript_HQ_South_transcript/31211/f4p0/1942	0.31601	0.0178	0.0562	0.0089	0.02805
OG05854	transcript_HQ_North_transcript46857/f2p0/865	transcript_HQ_South_transcript/46795/f20p0/878	0.23796	0.0019	0.008	0.00095	0.004
OG05855	transcript_HQ_North_transcript32474/f38p0/2619	transcript_HQ_South_transcript/10023/f7p0/3385	0.12105	0.0022	0.0182	0.0011	0.0091
OG05860	transcript_HQ_North_transcript20058/f37p0/3437	transcript_HQ_South_transcript/9397/f21p0/3447	0	0	0.0191	NA	0.00955
OG05861	transcript_HQ_North_transcript46107/f3p0/1294	transcript_HQ_South_transcript/41853/f4p0/1293	0	0	0.0286	NA	0.0143
OG05862	transcript_HQ_North_transcript33150/f7p0/2609	transcript_HQ_South_transcript/20196/f11p0/2600	0.11514	0.0019	0.0168	0.00095	0.0084
OG05864	transcript_HQ_North_transcript43711/f3p0/1721	transcript_HQ_South_transcript/35288/f3p0/1711	0	0	0.0307	NA	0.01535
OG05867	transcript_HQ_North_transcript43858/f4p0/1693	transcript_HQ_South_transcript/35005/f4p0/1696	0	0	0.0056	NA	0.00275
OG05870	transcript_HQ_North_transcript24165/f2p0/3171	transcript_HQ_South_transcript/12822/f2p0/3161	0.07849	0.0009	0.0109	0.00045	0.00545
OG05872	transcript_HQ_North_transcript7767/f3p0/4714	transcript_HQ_South_transcript/4094/f34p0/4164	0.01455	0.0004	0.0287	0.0002	0.0143
OG05876	transcript_HQ_North_transcript9855/f2p0/4377	transcript_HQ_South_transcript/3824/f6p0/4355	0	0	0.0232	NA	0.0116
OG05877	transcript_HQ_North_transcript46860/f6p0/846	transcript_HQ_South_transcript/47152/f104p0/730	0	0	0.0225	NA	0.01125
OG05878	transcript_HQ_North_transcript6694/f33p0/4865	transcript_HQ_South_transcript/2324/f6p0/4868	0	0	0.007	NA	0.00345
OG05879	transcript_HQ_North_transcript4098/f30p0/5493	transcript_HQ_South_transcript/1372/f2p0/5479	0.04903	0.0008	0.0166	0.0004	0.0083
OG05880	transcript_HQ_North_transcript46066/f2p0/1301	transcript_HQ_South_transcript/41783/f2p0/1303	NA	0.0042	0	0.0021	NA
OG05881	transcript_HQ_North_transcript28689/f19p0/2824	transcript_HQ_South_transcript/17374/f20p0/2781	0.04943	0.0005	0.0106	0.00025	0.0053
OG05882	transcript_HQ_North_transcript18588/f11p0/3536	transcript_HQ_South_transcript/15299/f3p0/2950	0.05825	0.0005	0.0086	0.00025	0.0043
OG05883	transcript_HQ_North_transcript8939/f13p0/4525	transcript_HQ_South_transcript/31470/f111p0/1887	0.11113	0.001	0.0089	0.0005	0.00445
OG05885	transcript_HQ_North_transcript44880/f11p0/1527	transcript_HQ_South_transcript/38174/f4p0/1530	0.02418	0.001	0.0426	0.0005	0.02135
OG05886	transcript_HQ_North_transcript46498/f3p0/1141	transcript_HQ_South_transcript/43846/f10p0/1131	0	0	0.0207	NA	0.0103
OG05887	transcript_HQ_North_transcript45572/f3p0/1422	transcript_HQ_South_transcript/14863/f2p0/2981	0	0	0.0141	NA	0.00705
OG05888	transcript_HQ_North_transcript33351/f14p0/2566	transcript_HQ_South_transcript/7997/f8p0/3619	0.08338	0.0034	0.0404	0.0017	0.0202
OG05889	transcript_HQ_North_transcript12444/f7p0/4081	transcript_HQ_South_transcript/5815/f3p0/3922	0	0	0.0021	NA	0.00105
OG05890	transcript_HQ_North_transcript42219/f7p0/1888	transcript_HQ_South_transcript/32277/f9p0/1879	0.24175	0.0091	0.0376	0.00455	0.0188
OG05892	transcript_HQ_North_transcript9144/f10p0/4473	transcript_HQ_South_transcript/3466/f3p0/4481	0.40893	0.0036	0.0089	0.0018	0.00445
OG05893	transcript_HQ_North_transcript26142/f2p0/3089	transcript_HQ_South_transcript/11595/f2p0/3227	0.0685	0.002	0.0292	0.001	0.0146
OG05895	transcript_HQ_North_transcript31668/f28p0/2679	transcript_HQ_South_transcript/18614/f12p0/2688	NA	0	0	NA	NA
OG05897	transcript_HQ_North_transcript9302/f10p0/4470	transcript_HQ_South_transcript/3475/f2p0/4467	0.25673	0.0023	0.0088	0.00115	0.0044
OG05898	transcript_HQ_North_transcript44631/f4p0/1588	transcript_HQ_South_transcript/37263/f9p0/1585	0.03796	0.0023	0.0599	0.00115	0.02995
OG05899	transcript_HQ_North_transcript45645/f5p0/1404	transcript_HQ_South_transcript/40339/f2p0/1405	0.06759	0.0023	0.0342	0.00115	0.0171
OG05902	transcript_HQ_North_transcript44533/f3p0/1633	transcript_HQ_South_transcript/34809/f2p0/1742	0	0	0.0086	NA	0.0043
OG05903	transcript_HQ_North_transcript22635/f2p0/3283	transcript_HQ_South_transcript/10665/f2p0/3341	0.54634	0.0024	0.0044	0.00115	0.0022
OG05904	transcript_HQ_North_transcript42726/f2p0/1842	transcript_HQ_South_transcript/33635/f3p0/1809	NA	0	0	NA	NA
OG05905	transcript_HQ_North_transcript41731/f3p0/1963	transcript_HQ_South_transcript/30676/f24p0/1947	0	0	0.0103	NA	0.00515
OG05906	transcript_LQ_North_transcript22046/f2p0/3270	transcript_HQ_South_transcript/11218/f5p0/3273	0.01599	0.0008	0.049	0.0004	0.02445
OG05907	transcript_HQ_North_transcript8432/f2p0/4610	transcript_HQ_South_transcript/22671/f5p0/2432	0.33006	0.0032	0.0097	0.0016	0.00485
OG05908	transcript_HQ_North_transcript2742/f4p0/6051	transcript_HQ_South_transcript/7594/f3p0/3692	NA	0.0022	0	0.0011	NA
OG05909	transcript_HQ_North_transcript31159/f3p0/2746	transcript_HQ_South_transcript/18054/f10p0/2727	0.42064	0.0021	0.0051	0.00105	0.0025
OG05910	transcript_HQ_North_transcript12333/f2p0/4108	transcript_HQ_South_transcript/2239/f2p0/4919	0.03108	0.0015	0.0476	0.00075	0.0238
OG05912	transcript_HQ_North_transcript46581/f5p0/1105	transcript_HQ_South_transcript/44172/f22p0/1077	0	0	0.0102	NA	0.0051
OG05913	transcript_HQ_North_transcript28715/f7p0/2882	transcript_HQ_South_transcript/16150/f2p0/2907	0.64887	0.0109	0.0167	0.0054	0.00835
OG05916	transcript_HQ_North_transcript43358/f4p0/1739	transcript_HQ_South_transcript/34699/f2p0/1748	0	0	0.0058	NA	0.0029
OG05917	transcript_HQ_North_transcript44156/f23p0/1641	transcript_HQ_South_transcript/36124/f39p0/1616	0.10433	0.0012	0.0113	0.0006	0.00565
OG05918	transcript_HQ_North_transcript7604/f2p0/4736	transcript_HQ_South_transcript/3583/f3p0/4407	0.39581	0.0058	0.0146	0.00285	0.0073
OG05919	transcript_HQ_North_transcript46879/f2p0/826	transcript_HQ_South_transcript/47371/f24p0/823	0.2151	0.0044	0.0205	0.0022	0.0102
OG05921	transcript_HQ_North_transcript19662/f2p0/3490	transcript_HQ_South_transcript/9298/f2p0/3481	0.50641	0.0115	0.0226	0.0057	0.0113
OG05922	transcript_HQ_North_transcript44730/f30p0/1552	transcript_HQ_South_transcript/36164/f148p0/1550	0.61145	0.0069	0.0113	0.00345	0.00565
OG05923	transcript_HQ_North_transcript13234/f2p0/4023	transcript_HQ_South_transcript/839/f2p0/6014	0.3146	0.003	0.0096	0.0015	0.00485
OG05924	transcript_HQ_North_transcript30777/f5p0/2765	transcript_HQ_South_transcript/18026/f2p0/2757	0.63391	0.0079	0.0124	0.00395	0.0062
OG05927	transcript_HQ_North_transcript26109/f2p0/3047	transcript_HQ_South_transcript/11500/f2p0/3273	0.20483	0.0051	0.0249	0.00255	0.0125
OG05928	transcript_HQ_North_transcript2466/f20p0/6176	transcript_HQ_South_transcript/697/f2p0/6161	0.03029	0.0002	0.0079	0.0001	0.00395
OG05930	transcript_HQ_North_transcript46161/f4p0/1263	transcript_HQ_South_transcript/42779/f11p0/1230	0.3961	0.0084	0.0212	0.0042	0.0106
OG05931	transcript_HQ_North_transcript43277/f2p0/1779	transcript_HQ_South_transcript/34208/f9p0/1763	0	0	0.0068	NA	0.0034
OG05933	transcript_HQ_North_transcript38510/f43p0/2112	transcript_HQ_South_transcript/14833/f3p0/2983	0.80273	0.0075	0.0094	0.00375	0.00465
OG05934	transcript_HQ_North_transcript14281/f13p0/3915	transcript_HQ_South_transcript/5896/f11p0/3922	0.10765	0.0092	0.0859	0.00465	0.04295
OG05935	transcript_HQ_North_transcript28467/f2p0/2913	transcript_HQ_South_transcript/4387/f4p0/4217	0.05839	0.0015	0.0259	0.00075	0.01295
OG05937	transcript_HQ_North_transcript44258/f6p0/1646	transcript_HQ_South_transcript/35962/f25p0/1646	0.03373	0.0011	0.0318	0.00055	0.01595
OG05940	transcript_HQ_North_transcript5678/f5p0/5089	transcript_HQ_South_transcript/3931/f3p0/4341	0.04823	0.0011	0.0234	0.00055	0.0117
OG05941	transcript_HQ_North_transcript30661/f10p0/2746	transcript_HQ_South_transcript/17888/f6p0/2753	0.24869	0.0015	0.0061	0.00075	0.00305
OG05942	transcript_HQ_North_transcript25578/f9p0/3071	transcript_HQ_South_transcript/13616/f4p0/3066	0	0	0.0026	NA	0.0013
OG05943	transcript_HQ_North_transcript11905/f27p0/4107	transcript_HQ_South_transcript/25361/f42p0/2217	0.16889	0.0029	0.0173	0.00145	0.00865
OG05946	transcript_HQ_North_transcript27488/f7p0/2942	transcript_HQ_South_transcript/15210/f3p0/2950	0	0	0.0027	NA	0.00135
OG05947	transcript_HQ_North_transcript31124/f2p0/2742	transcript_HQ_South_transcript/35164/f9p0/1680	0.61508	0.1866	0.3033	0.09325	0.15165
OG05948	transcript_HQ_North_transcript39264/f4p0/2162	transcript_HQ_South_transcript/26869/f10p0/2163	0.74842	0.0044	0.0059	0.0022	0.00295
OG05949	transcript_HQ_North_transcript46957/f4p0/528	transcript_HQ_South_transcript/51413/f3p0/527	NA	0	0	NA	NA
OG05950	transcript_HQ_North_transcript32827/f2p0/2626	transcript_HQ_South_transcript/21050/f5p0/2537	0.19435	0.0029	0.0147	0.00145	0.00735
OG05951	transcript_HQ_North_transcript46674/f2p0/1019	transcript_HQ_South_transcript/44963/f167p0/1013	0.72322	0.0091	0.0126	0.0046	0.0063
OG05952	transcript_HQ_North_transcript24246/f2p0/3182	transcript_HQ_South_transcript/10182/f6p0/3378	NA	0	0	NA	NA
OG05954	transcript_HQ_North_transcript4340/f98p0/5412	transcript_HQ_South_transcript/17858/f5p0/2755	0.06332	0.0014	0.0222	0.0007	0.0111
OG05955	transcript_HQ_North_transcript13351/f27p0/3954	transcript_HQ_South_transcript/5643/f2p0/3968	0.22325	0.0015	0.0069	0.0008	0.00345
OG05956	transcript_HQ_North_transcript12412/f15p0/4089	transcript_HQ_South_transcript/7358/f2p0/3713	NA	0.0066	0	0.0033	NA
OG05960	transcript_HQ_North_transcript35153/f97p0/2446	transcript_HQ_South_transcript/22014/f33p0/2422	0	0	0.0248	NA	0.0124
OG05961	transcript_HQ_North_transcript44318/f10p0/1598	transcript_HQ_South_transcript/36460/f30p0/1597	0	0	0.0232	NA	0.0116
OG05962	transcript_HQ_North_transcript36498/f11p0/2367	transcript_HQ_South_transcript/23814/f12p0/2373	0.05707	0.0005	0.0094	0.00025	0.0047
OG05964	transcript_HQ_North_transcript11345/f34p0/4181	transcript_HQ_South_transcript/4373/f8p0/4208	0.25866	0.004	0.0156	0.00205	0.0078
OG05965	transcript_HQ_North_transcript40311/f3p0/2083	transcript_HQ_South_transcript/28658/f13p0/2070	0.32069	0.0103	0.032	0.00515	0.016
OG05968	transcript_HQ_North_transcript510/f2p0/7323	transcript_HQ_South_transcript/117/f3p0/7337	0.26629	0.0069	0.0258	0.00345	0.0129
OG05969	transcript_HQ_North_transcript8476/f2p0/4672	transcript_HQ_South_transcript/37954/f2p0/1555	NA	0	0	NA	NA
OG05971	transcript_HQ_North_transcript37462/f2p0/2315	transcript_HQ_South_transcript/24864/f2p0/2313	0.91636	0.0018	0.002	0.0009	0.001
OG05972	transcript_HQ_North_transcript37855/f3p0/2282	transcript_HQ_South_transcript/26787/f2p0/2197	0.26211	0.0041	0.0155	0.00205	0.00775
OG05974	transcript_HQ_North_transcript31791/f4p0/2697	transcript_HQ_South_transcript/18883/f33p0/2658	0.2333	0.0048	0.0208	0.00245	0.0104
OG06008	transcript_HQ_North_transcript27775/f2p0/2969	transcript_HQ_South_transcript/10933/f2p0/3332	0.09103	0.0033	0.0361	0.0016	0.01805
OG06012	transcript_HQ_North_transcript36344/f2p0/2392	transcript_HQ_South_transcript/11447/f7p0/3256	0.18774	0.0067	0.0355	0.00335	0.01775
OG06025	transcript_HQ_North_transcript568/f5p0/7235	transcript_HQ_South_transcript/121/f8p0/7225	0.41413	0.0044	0.0106	0.0022	0.00525
OG06046	transcript_HQ_North_transcript3395/f2p0/5783	transcript_HQ_South_transcript/34608/f2p0/1757	0.12239	0.0046	0.0376	0.0023	0.0188
OG06048	transcript_HQ_North_transcript29067/f2p0/2882	transcript_HQ_South_transcript/38470/f2p0/1519	0	0	0.018	NA	0.009
OG06062	transcript_HQ_North_transcript23853/f7p0/3168	transcript_HQ_South_transcript/11820/f4p0/3210	0.25082	0.0071	0.0284	0.0036	0.0142
OG06092	transcript_HQ_North_transcript44186/f7p0/1648	transcript_HQ_South_transcript/36261/f3p0/1653	0.32806	0.007	0.0213	0.0035	0.01065
OG06098	transcript_HQ_North_transcript3/f2p0/11186	transcript_HQ_South_transcript/3107/f2p0/4678	0.38804	0.0011	0.0028	0.00055	0.0014
OG06104	transcript_HQ_North_transcript24727/f3p0/3119	transcript_HQ_South_transcript/13462/f4p0/3081	0.10295	0.0044	0.043	0.0022	0.02145
OG06113	transcript_HQ_North_transcript8003/f5p0/4657	transcript_HQ_South_transcript/2866/f6p0/4657	0.18623	0.001	0.0055	0.0005	0.00275
OG06123	transcript_HQ_North_transcript7872/f8p0/4676	transcript_HQ_South_transcript/12418/f3p0/3176	0.50533	0.0034	0.0068	0.00175	0.00345
OG06149	transcript_HQ_North_transcript31767/f2p0/2699	transcript_HQ_South_transcript/25406/f3p0/2273	0.1575	0.0032	0.0204	0.00165	0.0102
OG06150	transcript_HQ_North_transcript32169/f2p0/2677	transcript_HQ_South_transcript/20309/f2p0/2682	0.28541	0.0086	0.0302	0.0043	0.0151
OG06155	transcript_HQ_North_transcript18361/f2p0/3598	transcript_HQ_South_transcript/6167/f2p0/3892	0.37994	0.056	0.1473	0.028	0.07365
OG06164	transcript_HQ_North_transcript13575/f3p0/4007	transcript_HQ_South_transcript/18251/f2p0/2769	0	0	0.0122	NA	0.00605
OG06167	transcript_HQ_North_transcript25756/f2p0/3085	transcript_HQ_South_transcript/38187/f2p0/1536	0.1281	0.0028	0.022	0.0014	0.011
OG06170	transcript_HQ_North_transcript15196/f2p0/3846	transcript_HQ_South_transcript/9251/f4p0/3490	0.0517	0.0026	0.0495	0.00125	0.02475
OG06174	transcript_HQ_North_transcript3641/f2p0/5693	transcript_HQ_South_transcript/8236/f4p0/3593	1.10672	0.0085	0.0077	0.00425	0.00385
OG06175	transcript_HQ_North_transcript45376/f19p0/1461	transcript_HQ_South_transcript/39123/f40p0/1457	0.11344	0.0031	0.0275	0.00155	0.0138
OG06187	transcript_HQ_North_transcript44412/f5p0/1564	transcript_HQ_South_transcript/31342/f9p0/1934	0.09824	0.003	0.0308	0.00155	0.0154
OG06188	transcript_HQ_North_transcript38473/f3p0/2209	transcript_HQ_South_transcript/25860/f2p0/2256	NA	0	0	NA	NA
OG06227	transcript_HQ_North_transcript33865/f2p0/2548	transcript_HQ_South_transcript/31011/f2p0/1951	0.0741	0.0012	0.0157	0.0006	0.00785
OG06229	transcript_HQ_North_transcript41130/f2p0/2004	transcript_HQ_South_transcript/32686/f2p0/1864	0.45381	0.0175	0.0385	0.0087	0.01925
OG06243	transcript_HQ_North_transcript11724/f9p0/4168	transcript_HQ_South_transcript/4584/f3p0/4166	1.13913	0.0095	0.0084	0.0048	0.0042
OG06254	transcript_HQ_North_transcript18436/f6p0/3536	transcript_HQ_South_transcript/8158/f2p0/3606	0.25181	0.0018	0.0073	0.0009	0.00365
OG06261	transcript_HQ_North_transcript23107/f8p0/3227	transcript_HQ_South_transcript/11475/f5p0/3225	0.14392	0.0046	0.0317	0.0023	0.01585
OG06269	transcript_HQ_North_transcript17138/f2p0/3695	transcript_HQ_South_transcript/4899/f2p0/4098	0.05849	0.0014	0.0233	0.00065	0.01165
OG06278	transcript_HQ_North_transcript42168/f2p0/1889	transcript_HQ_South_transcript/33487/f21p0/1810	0.29991	0.0018	0.0062	0.00095	0.0031
OG06293	transcript_HQ_North_transcript24583/f29p0/3136	transcript_HQ_South_transcript/12465/f21p0/3153	NA	0.0035	0	0.00175	NA
OG06304	transcript_HQ_North_transcript33018/f3p0/2546	transcript_HQ_South_transcript/20965/f3p0/2547	0.34062	0.0098	0.0289	0.0049	0.01445
OG06446	transcript_HQ_North_transcript43450/f16p0/1731	transcript_HQ_South_transcript/34686/f16p0/1731	0.01461	0.0087	0.5979	0.00435	0.2989
OG06529	transcript_HQ_North_transcript46797/f4p0/952	transcript_HQ_South_transcript/42986/f2p0/1232	0.48676	0.0023	0.0047	0.00115	0.00235
OG06570	transcript_HQ_North_transcript46602/f4p0/1089	transcript_HQ_South_transcript/44415/f17p0/1087	0.20128	0.0021	0.0104	0.00105	0.00515
OG06633	transcript_HQ_North_transcript44943/f6p0/1506	transcript_HQ_South_transcript/38771/f6p0/1495	0.26821	0.0024	0.0091	0.0012	0.00455
OG06686	transcript_HQ_North_transcript44677/f2p0/1578	transcript_HQ_South_transcript/36922/f3p0/1630	0.15822	0.0038	0.0242	0.0019	0.01215
OG06691	transcript_HQ_North_transcript14170/f10p0/3912	transcript_HQ_South_transcript/5953/f2p0/3907	0.33162	0.0022	0.0065	0.00105	0.00325
OG06696	transcript_HQ_North_transcript1574/f2p0/6728	transcript_HQ_South_transcript/8412/f2p0/3590	0	0	0.0298	NA	0.0149
OG06701	transcript_HQ_North_transcript38429/f6p0/2148	transcript_HQ_South_transcript/5062/f2p0/4060	0.41135	0.0039	0.0095	0.00195	0.00475
OG06712	transcript_HQ_North_transcript14043/f50p0/3921	transcript_HQ_South_transcript/13646/f6p0/3061	0.12537	0.0016	0.0124	0.00075	0.0062
OG06726	transcript_HQ_North_transcript22888/f22p0/3219	transcript_HQ_South_transcript/11849/f3p0/3222	0	0	0.0071	NA	0.00355
OG06737	transcript_HQ_North_transcript15502/f4p0/3804	transcript_HQ_South_transcript/8032/f2p0/3617	0.1745	0.0029	0.0167	0.00145	0.00835
OG06748	transcript_HQ_North_transcript45583/f7p0/1416	transcript_HQ_South_transcript/40123/f9p0/1413	0.25344	0.0013	0.0052	0.00065	0.0026
OG06749	transcript_HQ_North_transcript29355/f4p0/2857	transcript_HQ_South_transcript/32689/f6p0/1842	0	0	0.0181	NA	0.00905
OG06761	transcript_HQ_North_transcript4117/f4p0/5498	transcript_HQ_South_transcript/5912/f2p0/3919	0.06291	0.005	0.0791	0.0025	0.03955
OG06778	transcript_HQ_North_transcript44157/f11p0/1628	transcript_HQ_South_transcript/36294/f15p0/1650	0.14576	0.0051	0.0349	0.00255	0.01745
OG06793	transcript_HQ_North_transcript14760/f2p0/3904	transcript_HQ_South_transcript/1804/f2p0/5180	0	0	0.0304	NA	0.0152
OG06797	transcript_HQ_North_transcript31019/f3p0/2747	transcript_HQ_South_transcript/35840/f2p0/1683	0	0	0.0043	NA	0.00215
OG06819	transcript_HQ_North_transcript8495/f6p0/4578	transcript_HQ_South_transcript/3103/f6p0/4580	0	0	0.0084	NA	0.0042
OG06833	transcript_HQ_North_transcript38098/f23p0/2200	transcript_HQ_South_transcript/26849/f7p0/2199	0	0	0.0042	NA	0.0021
OG06840	transcript_HQ_North_transcript9652/f3p0/4433	transcript_HQ_South_transcript/7471/f2p0/3697	0	0	0.0116	NA	0.0058
OG06850	transcript_HQ_North_transcript42835/f59p0/1785	transcript_HQ_South_transcript/3162/f58p0/4545	NA	0	0	NA	NA
OG06851	transcript_HQ_North_transcript10528/f24p0/4290	transcript_HQ_South_transcript/3999/f5p0/4290	0.07504	0.0006	0.0076	0.0003	0.0038
OG06861	transcript_HQ_North_transcript11034/f13p0/4213	transcript_HQ_South_transcript/4408/f12p0/4190	0.17655	0.0023	0.0129	0.00115	0.00645
OG06864	transcript_HQ_North_transcript21422/f4p0/3353	transcript_HQ_South_transcript/10758/f2p0/3334	0.54555	0.0145	0.0266	0.00725	0.0133
OG06872	transcript_HQ_North_transcript13200/f3p0/4023	transcript_HQ_South_transcript/5447/f2p0/4020	0.16426	0.0034	0.0209	0.00175	0.0104
OG06881	transcript_HQ_North_transcript15228/f2p0/3825	transcript_HQ_South_transcript/6540/f9p0/3805	0.21638	0.0397	0.1833	0.01985	0.09165
OG06898	transcript_HQ_North_transcript29531/f2p0/2846	transcript_HQ_South_transcript/16466/f2p0/2862	0.02055	0.0005	0.0254	0.0003	0.0127
OG06905	transcript_HQ_North_transcript22104/f7p0/3294	transcript_HQ_South_transcript/11070/f2p0/3302	0.12256	0.0012	0.01	0.00065	0.005
OG06922	transcript_HQ_North_transcript38737/f3p0/2203	transcript_HQ_South_transcript/11929/f5p0/3199	0	0	0.0041	NA	0.00205
OG06939	transcript_HQ_North_transcript22223/f12p0/3234	transcript_HQ_South_transcript/11531/f4p0/3240	0.18757	0.0054	0.029	0.00275	0.01455
OG06974	transcript_HQ_North_transcript44783/f2p0/1565	transcript_HQ_South_transcript/37714/f3p0/1569	0	0	0.0065	NA	0.00325
OG06977	transcript_HQ_North_transcript34660/f115p0/2474	transcript_HQ_South_transcript/21463/f73p0/2467	0	0	0.0433	NA	0.02165
OG06992	transcript_HQ_North_transcript45838/f7p0/1354	transcript_HQ_South_transcript/40822/f45p0/1341	0	0	0.0026	NA	0.0013
OG07009	transcript_HQ_North_transcript1887/f2p0/6560	transcript_HQ_South_transcript/32613/f6p0/1844	0.34009	0.0074	0.0216	0.0037	0.0108
OG07010	transcript_HQ_North_transcript43857/f14p0/1682	transcript_HQ_South_transcript/35669/f10p0/1668	0	0	0.0074	NA	0.0037
OG07035	transcript_HQ_North_transcript11725/f17p0/4120	transcript_HQ_South_transcript/4764/f2p0/4135	0.8259	0.0045	0.0054	0.0022	0.0027
OG07043	transcript_HQ_North_transcript44822/f6p0/1536	transcript_HQ_South_transcript/38322/f3p0/1530	1.41293	0.01	0.0071	0.005	0.00355
OG07051	transcript_HQ_North_transcript44063/f4p0/1657	transcript_HQ_South_transcript/30954/f5p0/1965	0	0	0.0068	NA	0.0034
OG07059	transcript_HQ_North_transcript45411/f2p0/1458	transcript_HQ_South_transcript/31891/f2p0/1913	0.84927	0.0022	0.0026	0.0011	0.00125
OG07061	transcript_HQ_North_transcript44583/f7p0/1592	transcript_HQ_South_transcript/36151/f45p0/1590	NA	0	0	NA	NA
OG07079	transcript_HQ_North_transcript1763/f5p0/6596	transcript_HQ_South_transcript/30516/f6p0/1970	0.14469	0.0023	0.0156	0.0011	0.0078
OG07083	transcript_HQ_North_transcript25793/f18p0/3070	transcript_HQ_South_transcript/13175/f89p0/3071	0.12315	0.0058	0.0475	0.0029	0.02375
OG07104	transcript_HQ_North_transcript33806/f21p0/2535	transcript_HQ_South_transcript/21118/f19p0/2534	0	0	0.01	NA	0.005
OG07120	transcript_HQ_North_transcript32481/f4p0/2656	transcript_HQ_South_transcript/33855/f4p0/1793	0.51204	0.0018	0.0035	0.0009	0.00175
OG07144	transcript_HQ_North_transcript2262/f5p0/6299	transcript_HQ_South_transcript/22752/f2p0/2439	0.07062	0.0006	0.0084	0.0003	0.00425
OG07159	transcript_HQ_North_transcript32713/f2p0/2642	transcript_HQ_South_transcript/24640/f3p0/2326	0.16663	0.0022	0.0133	0.0011	0.0066
OG07163	transcript_HQ_North_transcript4791/f2p0/5345	transcript_HQ_South_transcript/1403/f2p0/5447	0.10764	0.0014	0.0132	0.00075	0.00655
OG07181	transcript_HQ_North_transcript22644/f5p0/3254	transcript_HQ_South_transcript/11661/f2p0/3252	0.30707	0.3224	1.05	0.1612	0.52505
OG07201	transcript_HQ_North_transcript23569/f8p0/3216	transcript_HQ_South_transcript/12271/f4p0/3187	0.58518	0.008	0.0136	0.00395	0.00685
OG07203	transcript_HQ_North_transcript9967/f8p0/4396	transcript_HQ_South_transcript/7169/f3p0/3735	0.15761	0.0018	0.0112	0.0009	0.0056
OG07233	transcript_HQ_North_transcript19322/f3p0/3507	transcript_HQ_South_transcript/13725/f2p0/2792	0	0	0.0081	NA	0.00405
OG07235	transcript_HQ_North_transcript44365/f4p0/1621	transcript_HQ_South_transcript/37341/f2p0/1621	0	0	0.0077	NA	0.0038
OG07238	transcript_HQ_North_transcript15490/f3p0/3852	transcript_HQ_South_transcript/6397/f2p0/3851	0	0	0.0121	NA	0.00605
OG07243	transcript_HQ_North_transcript35186/f2p0/2494	transcript_HQ_South_transcript/21959/f22p0/2407	0.34731	0.0052	0.015	0.00265	0.0075
OG07256	transcript_HQ_North_transcript25364/f5p0/3108	transcript_HQ_South_transcript/13139/f3p0/3101	0.1116	0.003	0.0266	0.0015	0.0133
OG07262	transcript_HQ_North_transcript46533/f5p0/1129	transcript_HQ_South_transcript/43441/f15p0/1123	0.36643	0.0073	0.0199	0.00365	0.00995
OG07274	transcript_HQ_North_transcript45683/f7p0/1389	transcript_HQ_South_transcript/40477/f19p0/1368	0	0	0.0087	NA	0.00435
OG07291	transcript_HQ_North_transcript37663/f2p0/2288	transcript_HQ_South_transcript/25580/f3p0/2289	0.07557	0.0038	0.0504	0.0019	0.02515
OG07324	transcript_HQ_North_transcript40564/f11p0/1987	transcript_HQ_South_transcript/29862/f29p0/1981	0	0	0.0093	NA	0.0046
OG07325	transcript_HQ_North_transcript834/f2p0/6956	transcript_HQ_South_transcript/24053/f2p0/2379	0.83097	0.0031	0.0037	0.00155	0.0019
OG07330	transcript_HQ_North_transcript44735/f3p0/1585	transcript_HQ_South_transcript/38498/f11p0/1472	0.08654	0.0026	0.0299	0.0013	0.01495
OG07341	transcript_HQ_North_transcript7495/f2p0/4751	transcript_HQ_South_transcript/6417/f3p0/3863	NA	0	0	NA	NA
OG07347	transcript_HQ_North_transcript41799/f2p0/1919	transcript_HQ_South_transcript/32031/f14p0/1868	0	0	0.016	NA	0.008
OG07355	transcript_HQ_North_transcript46328/f3p0/1165	transcript_HQ_South_transcript/43064/f32p0/1173	1.07969	0.007	0.0064	0.0035	0.0032
OG07362	transcript_HQ_North_transcript36028/f26p0/2391	transcript_HQ_South_transcript/23259/f12p0/2384	0	0	0.0323	NA	0.01615
OG07365	transcript_HQ_North_transcript43918/f3p0/1688	transcript_HQ_South_transcript/30357/f3p0/2017	0.14157	0.0035	0.025	0.0018	0.0125
OG07376	transcript_HQ_North_transcript3991/f2p0/5548	transcript_HQ_South_transcript/923/f2p0/5940	0.13439	0.0019	0.0145	0.00095	0.0072
OG07398	transcript_HQ_North_transcript30407/f33p0/2704	transcript_HQ_South_transcript/8025/f5p0/3623	0.10196	0.0023	0.0224	0.00115	0.0112
OG07410	transcript_HQ_North_transcript46178/f4p0/1262	transcript_HQ_South_transcript/41914/f14p0/1258	0	0	0.005	NA	0.0025
OG07417	transcript_HQ_North_transcript21056/f5p0/3373	transcript_HQ_South_transcript/10633/f2p0/3337	0.19844	0.0011	0.0057	0.00055	0.00285
OG07420	transcript_HQ_North_transcript5803/f8p0/5020	transcript_HQ_South_transcript/6257/f2p0/3877	0.04063	0.0022	0.0542	0.0011	0.0271
OG07421	transcript_HQ_North_transcript39861/f51p0/2068	transcript_HQ_South_transcript/28274/f74p0/2061	0	0	0.0093	NA	0.00465
OG07425	transcript_HQ_North_transcript14169/f15p0/3824	transcript_HQ_South_transcript/19444/f21p0/2648	0.10456	0.0025	0.0237	0.00125	0.01185
OG07441	transcript_HQ_North_transcript42056/f16p0/1876	transcript_HQ_South_transcript/31902/f10p0/1888	NA	0.0023	0	0.00115	NA
OG07446	transcript_HQ_North_transcript22118/f2p0/3318	transcript_HQ_South_transcript/24979/f4p0/2293	0	0	0.0249	NA	0.01245
OG07453	transcript_HQ_North_transcript29845/f8p0/2789	transcript_HQ_South_transcript/17006/f30p0/2767	0	0	0.0081	NA	0.00405
OG07461	transcript_HQ_North_transcript42376/f3p0/1881	transcript_HQ_South_transcript/32313/f3p0/1880	0.48761	0.0016	0.0033	0.0008	0.00165
OG07464	transcript_HQ_North_transcript46746/f3p0/985	transcript_HQ_South_transcript/45432/f22p0/978	0	0	0.0242	NA	0.01215
OG07477	transcript_HQ_North_transcript39390/f6p0/2149	transcript_HQ_South_transcript/156/f2p0/7052	0.20079	0.0027	0.0135	0.00135	0.00675
OG07479	transcript_HQ_North_transcript18300/f20p0/3491	transcript_HQ_South_transcript/8587/f2p0/3555	0.30722	0.0054	0.0177	0.0027	0.00885
OG07480	transcript_HQ_North_transcript45679/f3p0/1361	transcript_HQ_South_transcript/22906/f2p0/2431	0	0	0.0027	NA	0.00135
OG07486	transcript_HQ_North_transcript46789/f4p0/957	transcript_HQ_South_transcript/46187/f4p0/955	0.12945	0.0044	0.0341	0.0022	0.017
OG07498	transcript_HQ_North_transcript43265/f2p0/1778	transcript_HQ_South_transcript/37159/f2p0/1617	0.26409	0.0025	0.0094	0.00125	0.0047
OG07509	transcript_HQ_North_transcript38067/f7p0/2234	transcript_HQ_South_transcript/26180/f7p0/2225	0.45175	0.004	0.0089	0.002	0.0045
OG07539	transcript_HQ_North_transcript17618/f40p0/3623	transcript_HQ_South_transcript/7960/f3p0/3625	0.03724	0.001	0.0272	0.0005	0.0136
OG07552	transcript_HQ_North_transcript17406/f5p0/3655	transcript_HQ_South_transcript/23906/f4p0/2371	0.20957	0.0036	0.0172	0.0018	0.0086
OG07570	transcript_HQ_North_transcript26766/f2p0/3024	transcript_HQ_South_transcript/15412/f2p0/2939	0.10403	0.002	0.0191	0.001	0.0096
OG07572	transcript_HQ_North_transcript27294/f36p0/2956	transcript_HQ_South_transcript/14259/f13p0/2980	0.05252	0.0029	0.0554	0.00145	0.0277
OG07615	transcript_HQ_North_transcript5729/f5p0/5073	transcript_HQ_South_transcript/40599/f36p0/1348	0	0	0.0088	NA	0.0044
OG07620	transcript_HQ_North_transcript14998/f8p0/3850	transcript_HQ_South_transcript/21466/f12p0/2521	0.06021	0.0005	0.0091	0.00025	0.00455
OG07631	transcript_HQ_North_transcript28315/f29p0/2870	transcript_HQ_South_transcript/40894/f2p0/1371	0.1859	0.002	0.0108	0.001	0.00535
OG07636	transcript_HQ_North_transcript45257/f2p0/1493	transcript_HQ_South_transcript/39048/f2p0/1493	0.26734	0.0039	0.0145	0.00195	0.00725
OG07643	transcript_HQ_North_transcript495/f6p0/7353	transcript_HQ_South_transcript/106/f2p0/7349	NA	0	0	NA	NA
OG07665	transcript_HQ_North_transcript600/f58p0/7155	transcript_HQ_South_transcript/139/f2p0/7152	0.06767	0.0011	0.0156	0.0005	0.00785
OG07673	transcript_HQ_North_transcript6283/f9p0/4958	transcript_HQ_South_transcript/2156/f7p0/4960	0.17592	0.0016	0.0092	0.0008	0.0046
OG07681	transcript_HQ_North_transcript43366/f2p0/1756	transcript_HQ_South_transcript/35104/f4p0/1724	0	0	0.0087	NA	0.00435
OG07683	transcript_HQ_North_transcript46657/f2p0/1036	transcript_HQ_South_transcript/45120/f5p0/1014	0	0	0.01	NA	0.005
OG07684	transcript_HQ_North_transcript28792/f9p0/2857	transcript_HQ_South_transcript/16818/f6p0/2827	0.17938	0.0015	0.0084	0.00075	0.0042
OG07697	transcript_HQ_North_transcript36497/f48p0/2267	transcript_HQ_South_transcript/25116/f38p0/2269	0	0	0.017	NA	0.0085
OG07700	transcript_HQ_North_transcript42175/f22p0/1794	transcript_HQ_South_transcript/33312/f19p0/1801	NA	0	0	NA	NA
OG07724	transcript_HQ_North_transcript32006/f2p0/2705	transcript_HQ_South_transcript/31758/f2p0/1930	NA	0	0	NA	NA
OG07727	transcript_HQ_North_transcript39431/f3p0/2141	transcript_HQ_South_transcript/30756/f2p0/1966	NA	0	0	NA	NA
OG07741	transcript_HQ_North_transcript40415/f17p0/2041	transcript_HQ_South_transcript/29010/f9p0/2044	0	0	0.0147	NA	0.00735
OG07744	transcript_HQ_North_transcript44457/f17p0/1606	transcript_HQ_South_transcript/36799/f14p0/1593	0.01986	0.0011	0.0556	0.00055	0.0278
OG07753	transcript_HQ_North_transcript46766/f3p0/979	transcript_HQ_South_transcript/45730/f7p0/985	0.15259	0.0016	0.0105	0.0008	0.00525
OG07755	transcript_HQ_North_transcript33580/f5p0/2582	transcript_HQ_South_transcript/20517/f3p0/2577	1.65436	0.0098	0.0059	0.0049	0.00295
OG07765	transcript_HQ_North_transcript43727/f5p0/1712	transcript_HQ_South_transcript/23754/f2p0/2378	0.66995	0.0038	0.0057	0.0019	0.00285
OG07772	transcript_HQ_North_transcript24980/f5p0/3120	transcript_HQ_South_transcript/12777/f5p0/3119	0	0	0.0315	NA	0.01575
OG07784	transcript_HQ_North_transcript36903/f5p0/2306	transcript_HQ_South_transcript/31696/f2p0/1917	0.41429	0.0048	0.0116	0.0024	0.00575
OG07810	transcript_HQ_North_transcript25616/f3p0/3077	transcript_HQ_South_transcript/44008/f62p0/1100	0.37282	0.0034	0.0092	0.0017	0.0046
OG07822	transcript_HQ_North_transcript35313/f7p0/2462	transcript_HQ_South_transcript/22299/f4p0/2462	0	0	0.0035	NA	0.00175
OG07834	transcript_HQ_North_transcript28683/f17p0/2888	transcript_HQ_South_transcript/16034/f6p0/2896	0.0744	0.0012	0.016	0.0006	0.00795
OG07849	transcript_HQ_North_transcript43288/f33p0/1742	transcript_HQ_South_transcript/34670/f40p0/1738	0.12218	0.0017	0.0141	0.00085	0.00705
OG07857	transcript_HQ_North_transcript40982/f17p0/1972	transcript_HQ_South_transcript/30411/f29p0/1969	0.23807	0.0041	0.0171	0.00205	0.0085
OG07867	transcript_HQ_North_transcript23065/f17p0/3195	transcript_HQ_South_transcript/11375/f12p0/3211	0.05413	0.0015	0.0271	0.00075	0.01355
OG07886	transcript_HQ_North_transcript34470/f12p0/2491	transcript_HQ_South_transcript/21501/f14p0/2491	0.47516	0.0047	0.0099	0.00235	0.00495
OG07895	transcript_HQ_North_transcript45459/f128p0/1359	transcript_HQ_South_transcript/41737/f5p0/1359	0.18374	0.0127	0.0694	0.00635	0.0347
OG07899	transcript_HQ_North_transcript9613/f8p0/4410	transcript_HQ_South_transcript/13967/f6p0/3041	0.0411	0.0014	0.0342	0.0007	0.0171
OG07922	transcript_HQ_North_transcript38343/f3p0/2242	transcript_HQ_South_transcript/21902/f2p0/2496	0	0	0.02	NA	0.00995
OG07929	transcript_HQ_North_transcript1269/f11p0/6722	transcript_HQ_South_transcript/399/f2p0/6725	0.34958	0.0017	0.0049	0.00085	0.00245
OG07930	transcript_HQ_North_transcript39448/f37p0/2124	transcript_HQ_South_transcript/26411/f2p0/2215	0	0	0.0049	NA	0.00245
OG07932	transcript_HQ_North_transcript40495/f427p0/1998	transcript_HQ_South_transcript/26660/f2p0/2175	0	0	0.0074	NA	0.0037
OG07947	transcript_HQ_North_transcript40668/f2p0/2033	transcript_HQ_South_transcript/29113/f2p0/2058	0.21777	0.0054	0.0247	0.0027	0.01235
OG07948	transcript_HQ_North_transcript42249/f7p0/1882	transcript_HQ_South_transcript/15003/f2p0/2951	0.28917	0.0076	0.0261	0.0038	0.01305
OG07950	transcript_HQ_North_transcript34430/f3p0/2511	transcript_HQ_South_transcript/22254/f4p0/2456	0.2511	0.0102	0.0406	0.0051	0.0203
OG07951	transcript_HQ_North_transcript33983/f37p0/2503	transcript_HQ_South_transcript/5863/f2p0/3941	0.07855	0.0009	0.0117	0.00045	0.00585
OG07953	transcript_HQ_North_transcript16563/f2p0/3725	transcript_HQ_South_transcript/25725/f2p0/2263	0.43612	0.0056	0.0128	0.0028	0.0064
OG07954	transcript_HQ_North_transcript45473/f3p0/1438	transcript_HQ_South_transcript/39692/f2p0/1444	0	0	0.0133	NA	0.00665
OG07955	transcript_HQ_North_transcript44893/f7p0/1541	transcript_HQ_South_transcript/37083/f10p0/1541	0	0	0.0035	NA	0.00175
OG07956	transcript_HQ_North_transcript6776/f7p0/4845	transcript_HQ_South_transcript/2464/f27p0/4664	46.0971	0.0027	0.0001	0.00135	5e-05
OG07958	transcript_HQ_North_transcript37497/f5p0/2303	transcript_HQ_South_transcript/24993/f3p0/2320	0.6754	0.0149	0.0221	0.00745	0.011
OG07959	transcript_HQ_North_transcript43205/f2p0/1777	transcript_HQ_South_transcript/81/f2p0/7558	NA	0	0	NA	NA
OG07960	transcript_HQ_North_transcript15437/f10p0/3797	transcript_HQ_South_transcript/6705/f23p0/3754	0.06587	0.0017	0.0257	0.00085	0.01285
OG07966	transcript_HQ_North_transcript8462/f2p0/4613	transcript_HQ_South_transcript/22788/f7p0/2377	0.13201	0.0048	0.0361	0.0024	0.0181
OG07967	transcript_HQ_North_transcript2577/f3p0/6184	transcript_HQ_South_transcript/32719/f4p0/1864	0.00367	0.4811	131.14	0.2406	65.5701
OG07971	transcript_HQ_North_transcript44285/f5p0/1620	transcript_HQ_South_transcript/36301/f27p0/1606	0.19239	0.0023	0.012	0.00115	0.00605
OG07972	transcript_HQ_North_transcript46051/f3p0/1309	transcript_HQ_South_transcript/41586/f5p0/1306	0.43556	0.0091	0.0209	0.00455	0.01045
OG07975	transcript_HQ_North_transcript4759/f3p0/5312	transcript_HQ_South_transcript/37892/f2p0/1556	0.17758	0.0033	0.0185	0.00165	0.00925
OG07977	transcript_HQ_North_transcript6786/f2p0/4867	transcript_HQ_South_transcript/2383/f3p0/4861	0.02221	0.0016	0.0698	0.0008	0.0349
OG07981	transcript_HQ_North_transcript45380/f2p0/1468	transcript_HQ_South_transcript/20433/f2p0/2621	NA	0	0	NA	NA
OG07982	transcript_HQ_North_transcript33894/f3p0/2553	transcript_HQ_South_transcript/20285/f3p0/2593	0.39398	0.011	0.0279	0.0055	0.01395
OG07983	transcript_HQ_North_transcript45660/f3p0/1397	transcript_HQ_South_transcript/40325/f3p0/1400	0.24003	0.0041	0.0173	0.0021	0.0086
OG07989	transcript_HQ_North_transcript13797/f6p0/3970	transcript_HQ_South_transcript/11809/f2p0/3230	0.59631	0.0058	0.0097	0.0029	0.00485
OG07991	transcript_HQ_North_transcript4880/f8p0/5271	transcript_HQ_South_transcript/29212/f2p0/2051	0.08376	0.003	0.0354	0.00145	0.0177
OG07997	transcript_HQ_North_transcript34823/f2p0/2474	transcript_HQ_South_transcript/21107/f103p0/2472	0	0	0.0037	NA	0.0018
OG07998	transcript_HQ_North_transcript46572/f2p0/1107	transcript_HQ_South_transcript/44210/f4p0/1117	2.27028	0.0104	0.0046	0.0052	0.00225
OG07999	transcript_HQ_North_transcript40002/f5p0/2093	transcript_HQ_South_transcript/28653/f2p0/2092	0.13993	0.0032	0.0225	0.0016	0.0113
OG08002	transcript_HQ_North_transcript40803/f13p0/2020	transcript_HQ_South_transcript/29666/f20p0/2019	0.07342	0.005	0.0675	0.00245	0.03375
OG08006	transcript_HQ_North_transcript45682/f2p0/1403	transcript_HQ_South_transcript/40103/f30p0/1398	0.09774	0.0021	0.0214	0.001	0.0107
OG08009	transcript_HQ_North_transcript39983/f26p0/2040	transcript_HQ_South_transcript/28192/f92p0/2041	0.08231	0.0023	0.0278	0.00115	0.0139
OG08010	transcript_HQ_North_transcript29167/f6p0/2854	transcript_HQ_South_transcript/16546/f4p0/2854	0	0	0.0101	NA	0.00505
OG08012	transcript_HQ_North_transcript18751/f8p0/3548	transcript_HQ_South_transcript/8427/f5p0/3552	0.38679	0.0032	0.0084	0.00165	0.0042
OG08014	transcript_HQ_North_transcript26986/f102p0/2940	transcript_HQ_South_transcript/15134/f62p0/2936	0.06266	0.0008	0.013	0.0004	0.0065
OG08015	transcript_HQ_North_transcript29073/f7p0/2873	transcript_HQ_South_transcript/18857/f5p0/2692	1.19467	0.0094	0.0079	0.00475	0.00395
OG08016	transcript_HQ_North_transcript3691/f2p0/5665	transcript_HQ_South_transcript/9590/f3p0/3463	0	0	0.0261	NA	0.01305
OG08018	transcript_HQ_North_transcript41682/f4p0/1921	transcript_HQ_South_transcript/31626/f7p0/1925	0.04329	0.0013	0.0306	0.00065	0.01525
OG08020	transcript_HQ_North_transcript18973/f2p0/3536	transcript_HQ_South_transcript/8688/f2p0/3556	0.55071	0.0042	0.0076	0.00215	0.0038
OG08021	transcript_HQ_North_transcript20025/f8p0/3456	transcript_HQ_South_transcript/9422/f3p0/3454	0.2765	0.0061	0.0221	0.0031	0.01105
OG08024	transcript_HQ_North_transcript5648/f12p0/5097	transcript_HQ_South_transcript/1887/f10p0/5061	0.10854	0.0023	0.0215	0.00115	0.0108
OG08025	transcript_HQ_North_transcript34600/f24p0/2476	transcript_HQ_South_transcript/21634/f15p0/2485	0	0	0.0112	NA	0.0056
OG08028	transcript_HQ_North_transcript46924/f3p0/721	transcript_HQ_South_transcript/48845/f5p0/720	0.25996	0.0201	0.0773	0.01005	0.0387
OG08030	transcript_HQ_North_transcript44188/f14p0/1621	transcript_HQ_South_transcript/36540/f49p0/1621	NA	0.0052	0	0.0026	NA
OG08031	transcript_HQ_North_transcript45571/f3p0/1427	transcript_HQ_South_transcript/40402/f9p0/1395	0.15887	0.0033	0.0205	0.00165	0.01025
OG08033	transcript_HQ_North_transcript11489/f2p0/4199	transcript_HQ_South_transcript/8124/f2p0/3602	0.08508	0.0014	0.016	0.0007	0.008
OG08039	transcript_HQ_North_transcript42353/f94p0/1850	transcript_HQ_South_transcript/32840/f11p0/1851	0.31686	0.0222	0.0702	0.0111	0.0351
OG08041	transcript_HQ_North_transcript35706/f6p0/2414	transcript_HQ_South_transcript/16522/f3p0/2847	0.18113	0.0012	0.0068	0.0006	0.00345
OG08042	transcript_HQ_North_transcript6329/f2p0/4985	transcript_HQ_South_transcript/9053/f3p0/3503	0.37734	0.0668	0.177	0.0334	0.0885
OG08045	transcript_HQ_North_transcript29029/f20p0/2845	transcript_HQ_South_transcript/16884/f2p0/2844	0.97896	0.0074	0.0076	0.0037	0.0038
OG08048	transcript_HQ_North_transcript19491/f4p0/3504	transcript_HQ_South_transcript/8678/f3p0/3536	0	0	0.0303	NA	0.01515
OG08050	transcript_HQ_North_transcript10840/f4p0/4262	transcript_HQ_South_transcript/1878/f2p0/5136	0	0	0.0038	NA	0.0019
OG08053	transcript_HQ_North_transcript20962/f6p0/3392	transcript_HQ_South_transcript/10012/f7p0/3386	0.3128	0.0009	0.0029	0.00045	0.00145
OG08058	transcript_HQ_North_transcript29341/f7p0/2846	transcript_HQ_South_transcript/31901/f7p0/1903	NA	0	0	NA	NA
OG08059	transcript_HQ_North_transcript22983/f5p0/3256	transcript_HQ_South_transcript/6433/f15p0/3827	0.09713	0.0044	0.0448	0.00215	0.02245
OG08062	transcript_HQ_North_transcript32705/f12p0/2619	transcript_HQ_South_transcript/19746/f2p0/2638	0.39576	0.0096	0.0241	0.0048	0.01205
OG08063	transcript_HQ_North_transcript5863/f3p0/5051	transcript_HQ_South_transcript/38590/f2p0/1519	0	0	0.0084	NA	0.0042
OG08069	transcript_HQ_North_transcript9532/f15p0/4291	transcript_HQ_South_transcript/38530/f3p0/1530	0	0	0.0245	NA	0.01225
OG08070	transcript_HQ_North_transcript7599/f7p0/4677	transcript_HQ_South_transcript/2794/f9p0/4684	0	0	0.0013	NA	0.00065
OG08073	transcript_HQ_North_transcript11888/f2p0/4144	transcript_HQ_South_transcript/22266/f2p0/2467	0.03676	0.0008	0.0216	0.0004	0.0108
OG08074	transcript_HQ_North_transcript22236/f2p0/3315	transcript_HQ_South_transcript/11048/f2p0/3305	0	0	0.0042	NA	0.0021
OG08075	transcript_HQ_North_transcript43407/f2p0/1762	transcript_HQ_South_transcript/34181/f19p0/1759	0.2232	0.0039	0.0175	0.00195	0.0088
OG08076	transcript_HQ_North_transcript3191/f4p0/5875	transcript_HQ_South_transcript/14959/f10p0/2920	0	0	0.0203	NA	0.0102
OG08081	transcript_HQ_North_transcript40807/f35p0/2021	transcript_HQ_South_transcript/28779/f3p0/2083	0.61263	0.0105	0.0171	0.00525	0.0086
OG08083	transcript_HQ_North_transcript37282/f19p0/2270	transcript_HQ_South_transcript/24142/f2p0/2361	NA	0	0	NA	NA
OG08084	transcript_HQ_North_transcript44275/f2p0/1638	transcript_HQ_South_transcript/36259/f22p0/1640	0	0	0.0124	NA	0.0062
OG08086	transcript_HQ_North_transcript40509/f4p0/2051	transcript_HQ_South_transcript/29716/f7p0/2023	0.20493	0.009	0.0441	0.0045	0.02205
OG08087	transcript_HQ_North_transcript45441/f9p0/1439	transcript_HQ_South_transcript/3650/f10p0/4411	1.08227	0.0127	0.0118	0.00635	0.0059
OG08094	transcript_HQ_North_transcript4304/f8p0/5426	transcript_HQ_South_transcript/1458/f2p0/5416	0	0	0.004	NA	0.002
OG08098	transcript_HQ_North_transcript27684/f2p0/2971	transcript_HQ_South_transcript/11788/f2p0/3224	0.68666	0.0233	0.0339	0.01165	0.01695
OG08100	transcript_HQ_North_transcript18218/f5p0/3584	transcript_HQ_South_transcript/8385/f2p0/3610	0.04247	0.0021	0.0488	0.00105	0.02435
OG08101	transcript_HQ_North_transcript46953/f3p0/580	transcript_HQ_South_transcript/48108/f4p0/785	0.21322	0.0289	0.1357	0.01445	0.06785
OG08102	transcript_HQ_North_transcript37609/f40p0/2199	transcript_HQ_South_transcript/25586/f54p0/2202	0	0	0.0057	NA	0.00285
OG08103	transcript_HQ_North_transcript43061/f2p0/1801	transcript_HQ_South_transcript/46225/f2p0/967	0.16614	0.0018	0.0106	0.0009	0.0053
OG08106	transcript_HQ_North_transcript45320/f5p0/1475	transcript_HQ_South_transcript/45285/f177p0/924	0.14998	0.2086	1.3911	0.1043	0.69555
OG08108	transcript_HQ_North_transcript17461/f14p0/3611	transcript_HQ_South_transcript/7928/f3p0/3623	0	0	0.0068	NA	0.0034
OG08109	transcript_HQ_North_transcript38470/f5p0/2225	transcript_HQ_South_transcript/25830/f3p0/2224	0.18722	0.0009	0.005	0.0005	0.00245
OG08114	transcript_HQ_North_transcript43517/f4p0/1738	transcript_HQ_South_transcript/32585/f2p0/1744	0.24401	0.0071	0.0293	0.0036	0.0146
OG08115	transcript_HQ_North_transcript45214/f2p0/1495	transcript_HQ_South_transcript/38829/f5p0/1494	0.07539	0.0017	0.022	0.00085	0.011
OG08116	transcript_HQ_North_transcript13972/f6p0/3940	transcript_HQ_South_transcript/22127/f6p0/2473	0.10523	0.0022	0.0212	0.0011	0.01055
OG08124	transcript_HQ_North_transcript3978/f2p0/5564	transcript_HQ_South_transcript/2563/f2p0/4767	0.29294	0.0003	0.001	0.00015	0.0005
OG08127	transcript_HQ_North_transcript18742/f2p0/3686	transcript_HQ_South_transcript/20832/f3p0/2560	0.54746	0.0095	0.0174	0.00475	0.0087
OG08128	transcript_HQ_North_transcript35306/f2p0/2460	transcript_HQ_South_transcript/20437/f2p0/2587	0.28298	0.0061	0.0215	0.00305	0.01075
OG08129	transcript_HQ_North_transcript33776/f2p0/2571	transcript_HQ_South_transcript/20513/f5p0/2564	0	0	0.0269	NA	0.01345
OG08131	transcript_HQ_North_transcript38530/f22p0/2179	transcript_HQ_South_transcript/26907/f3p0/2208	0.04284	0.0014	0.0317	0.0007	0.01585
OG08132	transcript_HQ_North_transcript38250/f9p0/2243	transcript_HQ_South_transcript/26977/f7p0/2189	0.19769	0.0024	0.0122	0.0012	0.0061
OG08133	transcript_HQ_North_transcript27025/f5p0/2991	transcript_HQ_South_transcript/26391/f4p0/2219	0.83049	0.0075	0.0091	0.00375	0.00455
OG08134	transcript_HQ_North_transcript33308/f2p0/2604	transcript_HQ_South_transcript/23843/f6p0/2379	0.21225	0.0052	0.0246	0.0026	0.0123
OG08138	transcript_HQ_North_transcript18520/f3p0/3576	transcript_HQ_South_transcript/27487/f8p0/2153	NA	0.0015	0	0.00075	NA
OG08140	transcript_HQ_North_transcript44731/f2p0/1584	transcript_HQ_South_transcript/44287/f2p0/1126	0.94607	0.0177	0.0187	0.00885	0.0094
OG08144	transcript_HQ_North_transcript40781/f2p0/2022	transcript_HQ_South_transcript/24523/f3p0/2262	0.36894	0.0012	0.0033	0.0006	0.00165
OG08145	transcript_HQ_North_transcript8248/f49p0/4592	transcript_HQ_South_transcript/3084/f4p0/4591	0.48823	0.0066	0.0135	0.0033	0.00675
OG08146	transcript_HQ_North_transcript9933/f19p0/4349	transcript_HQ_South_transcript/3877/f4p0/4349	NA	0	0	NA	NA
OG08149	transcript_HQ_North_transcript34151/f2p0/2545	transcript_HQ_South_transcript/40167/f2p0/1420	0	0	0.0064	NA	0.0032
OG08153	transcript_HQ_North_transcript24896/f2p0/3145	transcript_HQ_South_transcript/7507/f6p0/3664	0.23115	0.005	0.0215	0.00245	0.01075
OG08154	transcript_HQ_North_transcript40272/f2p0/2075	transcript_HQ_South_transcript/28768/f2p0/2097	0	0	0.0075	NA	0.00375
OG08157	transcript_HQ_North_transcript45076/f3p0/1515	transcript_HQ_South_transcript/38161/f3p0/1532	0.12607	0.0049	0.0385	0.0024	0.01925
OG08159	transcript_HQ_North_transcript6591/f3p0/4910	transcript_HQ_South_transcript/17145/f86p0/2686	NA	0	0	NA	NA
OG08160	transcript_HQ_North_transcript36777/f10p0/2350	transcript_HQ_South_transcript/24207/f4p0/2347	0.15724	0.0022	0.0143	0.00115	0.00715
OG08162	transcript_HQ_North_transcript33465/f5p0/2588	transcript_HQ_South_transcript/20226/f20p0/2579	0.10626	0.0035	0.0327	0.0017	0.01635
OG08163	transcript_HQ_North_transcript38755/f2p0/2218	transcript_HQ_South_transcript/6616/f3p0/3836	0.29119	0.0084	0.0289	0.0042	0.01445
OG08164	transcript_HQ_North_transcript15375/f2p0/3829	transcript_HQ_South_transcript/24443/f23p0/2333	0.12748	0.0039	0.0307	0.002	0.01535
OG08165	transcript_HQ_North_transcript7571/f2p0/4790	transcript_HQ_South_transcript/43415/f2p0/1186	NA	0.003	0	0.0015	NA
OG08167	transcript_HQ_North_transcript21870/f4p0/3326	transcript_HQ_South_transcript/6574/f2p0/3818	0.10667	0.0098	0.092	0.0049	0.046
OG08168	transcript_HQ_North_transcript13111/f2p0/4044	transcript_HQ_South_transcript/44273/f2p0/1117	0.01801	1.0662	59.1963	0.5331	29.5982
OG08170	transcript_HQ_North_transcript18984/f2p0/3552	transcript_HQ_South_transcript/8714/f8p0/3524	0.12557	0.0027	0.0218	0.00135	0.0109
OG08172	transcript_HQ_North_transcript16001/f2p0/3770	transcript_HQ_South_transcript/33130/f5p0/1805	0.15825	0.0015	0.0093	0.00075	0.00465
OG08178	transcript_HQ_North_transcript12415/f2p0/4137	transcript_HQ_South_transcript/23969/f2p0/2371	0.33773	0.0029	0.0087	0.0015	0.00435
OG08181	transcript_HQ_North_transcript10068/f2p0/4386	transcript_HQ_South_transcript/24900/f2p0/2318	0.28574	0.0077	0.027	0.00385	0.0135
OG08183	transcript_HQ_North_transcript8226/f7p0/4635	transcript_HQ_South_transcript/38196/f2p0/1568	0	0	0.0212	NA	0.01055
OG08187	transcript_HQ_North_transcript44673/f35p0/1576	transcript_HQ_South_transcript/37490/f23p0/1572	0.40566	0.0035	0.0086	0.00175	0.00435
OG08191	transcript_HQ_North_transcript46961/f3p0/487	transcript_HQ_South_transcript/51154/f151p0/410	NA	0	0	NA	NA
OG08192	transcript_HQ_North_transcript33060/f2p0/2630	transcript_HQ_South_transcript/50411/f5p0/581	0.35767	0.003	0.0084	0.0015	0.0042
OG08197	transcript_HQ_North_transcript31169/f10p0/2740	transcript_HQ_South_transcript/30060/f3p0/2017	0.05933	0.6338	10.6835	0.3169	5.34175
OG08199	transcript_HQ_North_transcript46738/f6p0/965	transcript_HQ_South_transcript/45045/f97p0/962	0	0	0.01	NA	0.005
OG08202	transcript_HQ_North_transcript38041/f9p0/2259	transcript_HQ_South_transcript/24501/f3p0/2341	0.32048	0.0073	0.0227	0.00365	0.0114
OG08203	transcript_HQ_North_transcript31867/f13p0/2670	transcript_HQ_South_transcript/19006/f7p0/2670	0.36181	0.0044	0.0122	0.00225	0.0061
OG08205	transcript_HQ_North_transcript38141/f3p0/2245	transcript_HQ_South_transcript/25807/f2p0/2256	0.49738	0.0067	0.0135	0.00335	0.00675
OG08206	transcript_HQ_North_transcript36889/f18p0/2328	transcript_HQ_South_transcript/24655/f18p0/2321	0.18325	0.0087	0.0474	0.00435	0.0237
OG08212	transcript_HQ_North_transcript17395/f2p0/3624	transcript_HQ_South_transcript/4170/f9p0/4260	0.00647	0.5045	78.0166	0.25225	39.0083
OG08219	transcript_HQ_North_transcript42106/f2p0/1850	transcript_HQ_South_transcript/39076/f3p0/1484	NA	0.0009	0	0.00045	NA
OG08221	transcript_HQ_North_transcript18971/f9p0/3509	transcript_HQ_South_transcript/8938/f2p0/3520	0.15572	0.0006	0.0039	0.0003	0.00195
OG08222	transcript_HQ_North_transcript16978/f348p0/3606	transcript_HQ_South_transcript/8306/f2p0/3592	0.36711	0.0013	0.0036	0.0007	0.0018
OG08224	transcript_HQ_North_transcript31707/f2p0/2654	transcript_HQ_South_transcript/20940/f2p0/2561	0.19395	0.0011	0.0058	0.00055	0.00285
OG08225	transcript_HQ_North_transcript22967/f5p0/3249	transcript_HQ_South_transcript/20441/f3p0/2579	0.42366	0.0066	0.0156	0.0033	0.00775
OG08226	transcript_HQ_North_transcript40588/f5p0/2020	transcript_HQ_South_transcript/30199/f2p0/2010	1.58433	0.008	0.005	0.00395	0.0025
OG08229	transcript_HQ_North_transcript46011/f36p0/1277	transcript_HQ_South_transcript/40736/f2p0/1293	0	0	0.0079	NA	0.00395
OG08232	transcript_HQ_North_transcript15389/f2p0/3837	transcript_HQ_South_transcript/9578/f2p0/3463	0.11517	0.0024	0.0209	0.0012	0.0104
OG08235	transcript_HQ_North_transcript45768/f5p0/1379	transcript_HQ_South_transcript/40655/f3p0/1372	0	0	0.0064	NA	0.0032
OG08240	transcript_HQ_North_transcript37227/f8p0/2289	transcript_HQ_South_transcript/23046/f33p0/2289	1.31368	0.0023	0.0018	0.00115	0.0009
OG08241	transcript_HQ_North_transcript43116/f62p0/1717	transcript_HQ_South_transcript/35310/f2p0/1741	0	0	0.0319	NA	0.01595
OG08243	transcript_HQ_North_transcript33825/f2p0/2564	transcript_HQ_South_transcript/24220/f7p0/2345	0.17794	0.0125	0.0704	0.0063	0.0352
OG08246	transcript_HQ_North_transcript3989/f3p0/5557	transcript_HQ_South_transcript/23432/f2p0/2405	0.06995	0.0006	0.0087	0.0003	0.0044
OG08249	transcript_HQ_North_transcript21424/f2p0/3365	transcript_HQ_South_transcript/16283/f2p0/2891	0.13553	0.4404	3.2496	0.2202	1.6248
OG08250	transcript_HQ_North_transcript29536/f2p0/2859	transcript_HQ_South_transcript/17945/f2p0/2865	0	0	0.0057	NA	0.00285
OG08253	transcript_HQ_North_transcript36318/f3p0/2392	transcript_HQ_South_transcript/23618/f4p0/2382	0.29196	0.0039	0.0134	0.00195	0.0067
OG08254	transcript_HQ_North_transcript22102/f2p0/3326	transcript_HQ_South_transcript/105/f4p0/7387	0.06817	0.0005	0.0079	0.0003	0.00395
OG08255	transcript_HQ_North_transcript25178/f11p0/3101	transcript_HQ_South_transcript/13497/f3p0/3095	0.79167	0.0179	0.0226	0.009	0.0113
OG08260	transcript_HQ_North_transcript16453/f9p0/3735	transcript_HQ_South_transcript/6917/f8p0/3748	0.16374	0.0094	0.0574	0.0047	0.0287
OG08263	transcript_HQ_North_transcript28488/f5p0/2860	transcript_HQ_South_transcript/16467/f3p0/2855	0.08223	0.0007	0.0089	0.00035	0.00445
OG08264	transcript_HQ_North_transcript45845/f17p0/1328	transcript_HQ_South_transcript/40626/f24p0/1312	0.11329	0.0061	0.0535	0.00305	0.02675
OG08266	transcript_HQ_North_transcript8293/f2p0/4631	transcript_HQ_South_transcript/9221/f2p0/3489	0.13843	0.0037	0.0264	0.00185	0.0132
OG08268	transcript_HQ_North_transcript3578/f15p0/5620	transcript_HQ_South_transcript/663/f3p0/6172	0.08202	0.0016	0.0193	0.0008	0.00965
OG08270	transcript_HQ_North_transcript5846/f6p0/5028	transcript_HQ_South_transcript/2712/f33p0/4676	0.05149	0.0015	0.0286	0.00075	0.0143
OG08271	transcript_HQ_North_transcript26297/f2p0/3049	transcript_HQ_South_transcript/14765/f2p0/2971	1.06116	0.0061	0.0057	0.003	0.00285
OG08272	transcript_HQ_North_transcript23973/f18p0/3101	transcript_HQ_South_transcript/13106/f5p0/3108	0	0	0.0361	NA	0.01805
OG08277	transcript_HQ_North_transcript35982/f2p0/2410	transcript_HQ_South_transcript/43958/f2p0/1147	0	0	0.0194	NA	0.0097
OG08279	transcript_HQ_North_transcript46457/f2p0/1168	transcript_HQ_South_transcript/43782/f2p0/1159	NA	0	0	NA	NA
OG08280	transcript_HQ_North_transcript19123/f2p0/3530	transcript_HQ_South_transcript/9885/f2p0/3405	0.09698	0.1697	1.75	0.0849	0.875
OG08281	transcript_HQ_North_transcript10604/f36p0/4295	transcript_HQ_South_transcript/15109/f6p0/2955	0.19193	0.0033	0.0171	0.00165	0.00855
OG08282	transcript_HQ_North_transcript17682/f2p0/3639	transcript_HQ_South_transcript/7765/f2p0/3655	NA	0	0	NA	NA
OG08287	transcript_HQ_North_transcript26323/f3p0/3074	transcript_HQ_South_transcript/15422/f25p0/2878	0.19303	0.0044	0.023	0.0022	0.0115
OG08292	transcript_HQ_North_transcript8775/f33p0/4530	transcript_HQ_South_transcript/3314/f2p0/4525	0.05149	0.0006	0.0108	0.00025	0.0054
OG08293	transcript_HQ_North_transcript28941/f5p0/2853	transcript_HQ_South_transcript/8898/f2p0/3508	0.1991	0.0028	0.014	0.0014	0.00705
OG08294	transcript_HQ_North_transcript6265/f3p0/4982	transcript_HQ_South_transcript/8947/f2p0/3531	0.25623	0.0128	0.05	0.0064	0.025
OG08295	transcript_HQ_North_transcript35486/f3p0/2395	transcript_HQ_South_transcript/24885/f4p0/2325	0.5245	0.0358	0.0683	0.0179	0.0341
OG08297	transcript_HQ_North_transcript2583/f3p0/6158	transcript_HQ_South_transcript/39102/f3p0/1487	0.21881	0.0041	0.0187	0.00205	0.00935
OG08301	transcript_HQ_North_transcript35397/f4p0/2363	transcript_HQ_South_transcript/22824/f8p0/2368	0.59892	0.0091	0.0152	0.00455	0.0076
OG08302	transcript_HQ_North_transcript31831/f6p0/2693	transcript_HQ_South_transcript/18342/f3p0/2701	0.19342	0.0053	0.0274	0.00265	0.0137
OG08304	transcript_HQ_North_transcript43925/f5p0/1681	transcript_HQ_South_transcript/35666/f78p0/1678	0.88244	0.0095	0.0108	0.0047	0.0054
OG08305	transcript_HQ_North_transcript46843/f2p0/886	transcript_HQ_South_transcript/46679/f49p0/884	0.81098	0.0185	0.0228	0.00925	0.0114
OG08308	transcript_HQ_North_transcript12638/f3p0/4076	transcript_HQ_South_transcript/5015/f3p0/4078	0.47819	0.0052	0.0108	0.0026	0.00545
OG08309	transcript_HQ_North_transcript46851/f2p0/861	transcript_HQ_South_transcript/47345/f2p0/857	0.19321	0.008	0.0415	0.004	0.02075
OG08310	transcript_HQ_North_transcript36459/f10p0/2371	transcript_HQ_South_transcript/23711/f3p0/2389	0	0	0.0095	NA	0.00475
OG08311	transcript_HQ_North_transcript11906/f2p0/4157	transcript_HQ_South_transcript/2616/f2p0/4763	0.80296	0.0105	0.013	0.00525	0.0065
OG08312	transcript_HQ_North_transcript12505/f115p0/4006	transcript_HQ_South_transcript/5054/f9p0/4059	0.3142	0.0095	0.0303	0.00475	0.0152
OG08313	transcript_HQ_North_transcript38336/f17p0/2184	transcript_HQ_South_transcript/39355/f3p0/1485	0.02086	0.6906	33.1028	0.34525	16.5514
OG08314	transcript_HQ_North_transcript46412/f9p0/1181	transcript_HQ_South_transcript/42262/f52p0/1180	0.03567	0.0016	0.0439	0.00075	0.02195
OG08315	transcript_HQ_North_transcript21716/f2p0/3346	transcript_HQ_South_transcript/10502/f2p0/3348	0.06336	0.0007	0.0107	0.00035	0.00535
OG08316	transcript_HQ_North_transcript46601/f4p0/1029	transcript_HQ_South_transcript/45590/f10p0/992	0.21779	0.011	0.0505	0.0055	0.02525
OG08318	transcript_HQ_North_transcript45957/f14p0/1307	transcript_HQ_South_transcript/41363/f6p0/1332	0.01439	0.0021	0.1488	0.0011	0.0744
OG08319	transcript_HQ_North_transcript4110/f2p0/5510	transcript_HQ_South_transcript/17232/f2p0/2805	0.44701	0.0068	0.0153	0.0034	0.0076
OG08320	transcript_HQ_North_transcript32315/f2p0/2651	transcript_HQ_South_transcript/19301/f3p0/2704	NA	0	0	NA	NA
OG08323	transcript_HQ_North_transcript45071/f2p0/1519	transcript_HQ_South_transcript/8009/f5p0/3613	0.52928	0.0031	0.0058	0.00155	0.0029
OG08324	transcript_HQ_North_transcript41636/f2p0/1951	transcript_HQ_South_transcript/14443/f2p0/3022	NA	0.0026	0	0.00125	NA
OG08325	transcript_HQ_North_transcript26535/f2p0/2954	transcript_HQ_South_transcript/14087/f41p0/2935	0	0	0.0415	NA	0.0207
OG08326	transcript_HQ_North_transcript5979/f2p0/5049	transcript_HQ_South_transcript/32051/f4p0/1895	0.12405	0.004	0.0324	0.002	0.0162
OG08327	transcript_HQ_North_transcript46695/f3p0/1028	transcript_HQ_South_transcript/45540/f18p0/998	0.45094	0.0065	0.0144	0.00325	0.00715
OG08330	transcript_HQ_North_transcript32805/f2p0/2650	transcript_HQ_South_transcript/19484/f8p0/2637	27.9303	0.0023	0.0001	0.00115	5e-05
OG08331	transcript_HQ_North_transcript45851/f3p0/1359	transcript_HQ_South_transcript/41235/f3p0/1362	0.44518	0.0049	0.011	0.00245	0.0055
OG08332	transcript_HQ_North_transcript38951/f7p0/2187	transcript_HQ_South_transcript/26533/f11p0/2187	NA	0	0	NA	NA
OG08333	transcript_HQ_North_transcript22902/f20p0/3227	transcript_HQ_South_transcript/11569/f2p0/3233	0.04989	0.0006	0.0128	0.0003	0.0064
OG08334	transcript_HQ_North_transcript6483/f2p0/4929	transcript_HQ_South_transcript/3746/f2p0/4409	0.16792	0.0049	0.0294	0.0025	0.01465
OG08337	transcript_HQ_North_transcript12818/f2p0/4071	transcript_HQ_South_transcript/6731/f2p0/3799	0.26488	0.0052	0.0198	0.00265	0.0099
OG08339	transcript_HQ_North_transcript41003/f4p0/2011	transcript_HQ_South_transcript/29876/f4p0/2003	0	0	0.0045	NA	0.00225
OG08340	transcript_HQ_North_transcript44309/f2p0/1637	transcript_HQ_South_transcript/35152/f2p0/1723	0.2553	0.0036	0.014	0.00175	0.007
OG08341	transcript_HQ_North_transcript6025/f68p0/4928	transcript_HQ_South_transcript/2169/f23p0/4933	0.15505	0.0041	0.0266	0.00205	0.0133
OG08342	transcript_HQ_North_transcript44245/f2p0/1649	transcript_HQ_South_transcript/29198/f3p0/2067	0.48191	0.0107	0.0222	0.00535	0.0111
OG08343	transcript_HQ_North_transcript18686/f5p0/3555	transcript_HQ_South_transcript/32990/f3p0/1849	0	0	0.0267	NA	0.01335
OG08344	transcript_HQ_North_transcript30006/f2p0/2818	transcript_HQ_South_transcript/14055/f4p0/3009	0	0	0.0118	NA	0.0059
OG08345	transcript_HQ_North_transcript2041/f8p0/6427	transcript_HQ_South_transcript/34135/f5p0/1772	0.27888	0.0015	0.0055	0.0008	0.0027
OG08346	transcript_HQ_North_transcript40860/f22p0/1968	transcript_HQ_South_transcript/30098/f11p0/1969	0.29274	0.0037	0.0126	0.00185	0.0063
OG08347	transcript_HQ_North_transcript43797/f36p0/1692	transcript_HQ_South_transcript/34890/f2p0/1693	0.17284	0.0018	0.0106	0.0009	0.0053
OG08349	transcript_HQ_North_transcript9085/f2p0/4489	transcript_HQ_South_transcript/48044/f5p0/794	0.07094	0.2255	3.1795	0.11275	1.5897
OG08350	transcript_HQ_North_transcript46257/f6p0/1205	transcript_HQ_South_transcript/42679/f5p0/1223	0.32044	0.0373	0.1163	0.01865	0.05815
OG08352	transcript_HQ_North_transcript41934/f6p0/1865	transcript_HQ_South_transcript/31810/f5p0/1913	0.24501	0.0042	0.017	0.0021	0.0085
OG08355	transcript_HQ_North_transcript42351/f12p0/1864	transcript_HQ_South_transcript/31899/f10p0/1855	NA	0	0	NA	NA
OG08356	transcript_HQ_North_transcript35135/f20p0/2446	transcript_HQ_South_transcript/22992/f2p0/2445	0	0	0.0201	NA	0.01005
OG08357	transcript_HQ_North_transcript15115/f14p0/3822	transcript_HQ_South_transcript/6492/f4p0/3820	0.1337	0.0016	0.0121	0.0008	0.006
OG08359	transcript_HQ_North_transcript44119/f4p0/1664	transcript_HQ_South_transcript/12784/f6p0/3144	0	0	0.0406	NA	0.0203
OG08360	transcript_HQ_North_transcript38345/f5p0/2241	transcript_HQ_South_transcript/21470/f2p0/2525	0.97588	0.0145	0.0148	0.00725	0.00745
OG08361	transcript_HQ_North_transcript14459/f10p0/3900	transcript_HQ_South_transcript/6468/f27p0/3717	0.0661	0.001	0.0156	0.0005	0.0078
OG08362	transcript_HQ_North_transcript24912/f12p0/3125	transcript_HQ_South_transcript/16041/f4p0/2892	0.19099	0.0012	0.0064	0.0006	0.0032
OG08364	transcript_HQ_North_transcript30778/f4p0/2765	transcript_HQ_South_transcript/16837/f7p0/2762	0.20606	0.0092	0.0445	0.0046	0.02225
OG08365	transcript_HQ_North_transcript26746/f2p0/3053	transcript_HQ_South_transcript/14075/f2p0/3043	0.16581	0.0011	0.0067	0.00055	0.00335
OG08367	transcript_HQ_North_transcript32983/f11p0/2579	transcript_HQ_South_transcript/19446/f2p0/2651	0.17919	0.0038	0.0212	0.0019	0.0106
OG08369	transcript_HQ_North_transcript11614/f20p0/4141	transcript_HQ_South_transcript/4690/f4p0/4139	0.53213	0.0016	0.0029	0.0008	0.00145
OG08374	transcript_HQ_North_transcript25323/f2p0/3102	transcript_HQ_South_transcript/29024/f2p0/2084	0	0	0.0261	NA	0.01305
OG08375	transcript_HQ_North_transcript35849/f2p0/2427	transcript_HQ_South_transcript/9769/f2p0/3480	0.07893	0.0022	0.0282	0.0011	0.0141
OG08380	transcript_HQ_North_transcript25439/f2p0/3111	transcript_HQ_South_transcript/11528/f2p0/3260	0.32078	0.0154	0.0481	0.0077	0.02405
OG08382	transcript_HQ_North_transcript28282/f16p0/2860	transcript_HQ_South_transcript/16400/f2p0/2831	0.22809	0.0031	0.0135	0.00155	0.0068
OG08384	transcript_HQ_North_transcript39834/f16p0/2065	transcript_HQ_South_transcript/13138/f3p0/3139	0.13715	0.0028	0.0203	0.00135	0.0102
OG08386	transcript_HQ_North_transcript21132/f10p0/3380	transcript_HQ_South_transcript/9980/f2p0/3380	0.29528	0.0382	0.1294	0.0191	0.0647
OG08388	transcript_HQ_North_transcript46838/f8p0/872	transcript_HQ_South_transcript/46536/f148p0/869	0.56148	0.0222	0.0395	0.0111	0.01975
OG08389	transcript_HQ_North_transcript34170/f11p0/2519	transcript_HQ_South_transcript/21323/f2p0/2545	0.29349	0.002	0.0068	0.001	0.0034
OG08390	transcript_HQ_North_transcript610/f5p0/7146	transcript_HQ_South_transcript/3874/f2p0/4347	0.34146	0.0081	0.0238	0.00405	0.0119
OG08392	transcript_HQ_North_transcript30594/f4p0/2779	transcript_HQ_South_transcript/21099/f2p0/2568	1.33889	0.0127	0.0095	0.0064	0.00475
OG08394	transcript_HQ_North_transcript2867/f2p0/6005	transcript_HQ_South_transcript/3091/f2p0/4613	1.72633	0.0139	0.0081	0.007	0.00405
OG08395	transcript_HQ_North_transcript33359/f2p0/2597	transcript_HQ_South_transcript/19434/f7p0/2646	0.21532	0.0048	0.0224	0.0024	0.01115
OG08396	transcript_HQ_North_transcript46420/f3p0/1176	transcript_HQ_South_transcript/43196/f31p0/1175	0	0	0.08	NA	0.04
OG08399	transcript_HQ_North_transcript7621/f45p0/4656	transcript_HQ_South_transcript/3803/f4p0/4348	0.11099	0.0033	0.0297	0.00165	0.01485
OG08400	transcript_HQ_North_transcript39725/f4p0/2098	transcript_HQ_South_transcript/27676/f2p0/2160	NA	0.004	0	0.002	NA
OG08403	transcript_HQ_North_transcript20700/f3p0/3424	transcript_HQ_South_transcript/6159/f2p0/3895	0.36265	0.0041	0.0112	0.00205	0.00565
OG08404	transcript_HQ_North_transcript17347/f2p0/3666	transcript_HQ_South_transcript/8753/f2p0/3517	0.04074	0.0008	0.0201	0.0004	0.0101
OG08409	transcript_HQ_North_transcript9530/f2p0/4534	transcript_HQ_South_transcript/3346/f3p0/4531	0.09955	0.0053	0.0537	0.00265	0.02685
OG08410	transcript_HQ_North_transcript25108/f9p0/3091	transcript_HQ_South_transcript/12416/f24p0/3124	0.28912	0.0038	0.0131	0.0019	0.00655
OG08411	transcript_HQ_North_transcript14838/f2p0/3876	transcript_HQ_South_transcript/21476/f4p0/2486	0.11978	0.0017	0.014	0.00085	0.007
OG08416	transcript_HQ_North_transcript27708/f48p0/2921	transcript_HQ_South_transcript/15340/f28p0/2919	0.26735	0.0067	0.0252	0.00335	0.0126
OG08417	transcript_HQ_North_transcript14421/f10p0/3901	transcript_HQ_South_transcript/42788/f2p0/1231	0.08497	0.0015	0.0177	0.00075	0.0089
OG08421	transcript_HQ_North_transcript4250/f2p0/5465	transcript_HQ_South_transcript/1534/f2p0/5338	0.36614	0.007	0.019	0.0035	0.0095
OG08423	transcript_HQ_North_transcript9257/f2p0/4491	transcript_HQ_South_transcript/2244/f2p0/4947	0.33526	0.0166	0.0494	0.00825	0.0247
OG08426	transcript_HQ_North_transcript38018/f5p0/2229	transcript_HQ_South_transcript/17692/f6p0/2767	0.57563	0.0056	0.0098	0.00285	0.00485
OG08427	transcript_HQ_North_transcript46941/f2p0/693	transcript_HQ_South_transcript/48910/f2p0/688	0.30806	0.0132	0.0428	0.00655	0.02135
OG08428	transcript_HQ_North_transcript33517/f2p0/2601	transcript_HQ_South_transcript/17487/f2p0/2781	0.24248	0.0019	0.0077	0.00095	0.00385
OG08431	transcript_HQ_North_transcript4675/f4p0/5339	transcript_HQ_South_transcript/16681/f4p0/2825	0	0	0.0176	NA	0.00885
OG08432	transcript_HQ_North_transcript21996/f7p0/3194	transcript_HQ_South_transcript/12000/f6p0/3198	0.19559	0.0046	0.0233	0.00225	0.01165
OG08435	transcript_HQ_North_transcript12928/f3p0/4060	transcript_HQ_South_transcript/19168/f5p0/2659	0.07128	0.0007	0.0103	0.00035	0.00515
OG08436	transcript_HQ_North_transcript21336/f9p0/3368	transcript_HQ_South_transcript/12988/f11p0/3077	1.34872	0.0029	0.0022	0.00145	0.0011
OG08437	transcript_HQ_North_transcript43541/f10p0/1732	transcript_HQ_South_transcript/33880/f2p0/1795	0.33202	0.0031	0.0093	0.00155	0.00465
OG08438	transcript_HQ_North_transcript7819/f5p0/4700	transcript_HQ_South_transcript/41725/f27p0/1294	0.29125	0.0023	0.0079	0.00115	0.00395
OG08439	transcript_HQ_North_transcript8474/f23p0/4519	transcript_HQ_South_transcript/2963/f10p0/4621	0.29847	0.0064	0.0216	0.0032	0.0108
OG08440	transcript_HQ_North_transcript2144/f2p0/6394	transcript_HQ_South_transcript/39351/f2p0/1470	0	0	0.009	NA	0.0045
OG08444	transcript_HQ_North_transcript4511/f2p0/5392	transcript_HQ_South_transcript/5596/f4p0/3956	0	0	0.0083	NA	0.00415
OG08445	transcript_HQ_North_transcript27402/f2p0/2988	transcript_HQ_South_transcript/15594/f30p0/2872	0	0	0.1248	NA	0.06235
OG08448	transcript_HQ_North_transcript8243/f25p0/4543	transcript_HQ_South_transcript/3182/f6p0/4547	0.12258	0.0005	0.0037	0.00025	0.0018
OG08449	transcript_HQ_North_transcript10318/f6p0/4336	transcript_HQ_South_transcript/3755/f2p0/4391	0	0	0.0118	NA	0.0059
OG08451	transcript_HQ_North_transcript45938/f2p0/1342	transcript_HQ_South_transcript/41040/f12p0/1336	0.2044	0.0046	0.0225	0.0023	0.01125
OG08452	transcript_HQ_North_transcript33840/f14p0/2545	transcript_HQ_South_transcript/20781/f8p0/2560	0.86261	0.005	0.0057	0.00245	0.00285
OG08453	transcript_HQ_North_transcript32851/f8p0/2618	transcript_HQ_South_transcript/19801/f3p0/2623	0.88602	0.0054	0.0061	0.0027	0.00305
OG08454	transcript_HQ_North_transcript8789/f2p0/4500	transcript_HQ_South_transcript/20609/f2p0/2613	0.44219	0.0325	0.0735	0.01625	0.03675
OG08455	transcript_HQ_North_transcript43983/f3p0/1703	transcript_HQ_South_transcript/10671/f3p0/3362	0.70067	0.0021	0.003	0.00105	0.0015
OG08459	transcript_HQ_North_transcript45120/f2p0/1515	transcript_HQ_South_transcript/45825/f5p0/976	0.1099	0.0079	0.0719	0.00395	0.03595
OG08461	transcript_HQ_North_transcript6811/f2p0/4886	transcript_HQ_South_transcript/39513/f7p0/1442	0.05131	0.0011	0.0211	0.00055	0.0105
OG08462	transcript_HQ_North_transcript30260/f60p0/2655	transcript_HQ_South_transcript/18523/f13p0/2654	0.08057	0.0007	0.0084	0.0003	0.0042
OG08463	transcript_HQ_North_transcript28565/f4p0/2930	transcript_HQ_South_transcript/17574/f4p0/2764	0.95152	0.027	0.0284	0.0135	0.0142
OG08464	transcript_HQ_North_transcript45944/f3p0/1342	transcript_HQ_South_transcript/41377/f2p0/1337	0.42734	0.0123	0.0288	0.00615	0.0144
OG08465	transcript_HQ_North_transcript32103/f2p0/2673	transcript_HQ_South_transcript/23827/f2p0/2379	0.04798	0.0006	0.0128	0.0003	0.00635
OG08466	transcript_HQ_North_transcript43540/f8p0/1660	transcript_HQ_South_transcript/36045/f15p0/1660	0	0	0.0099	NA	0.005
OG08467	transcript_HQ_North_transcript18213/f17p0/3556	transcript_HQ_South_transcript/8490/f3p0/3570	0.17472	0.0027	0.0156	0.00135	0.0078
OG08468	transcript_HQ_North_transcript21964/f2p0/3358	transcript_HQ_South_transcript/15401/f2p0/2935	0.05303	0.9342	17.6166	0.4671	8.8083
OG08471	transcript_HQ_North_transcript28841/f13p0/2892	transcript_HQ_South_transcript/21008/f2p0/2558	0.21061	0.0082	0.0389	0.0041	0.01945
OG08472	transcript_HQ_North_transcript38923/f8p0/2173	transcript_HQ_South_transcript/25831/f14p0/2178	0	0	0.0205	NA	0.01025
OG08473	transcript_HQ_North_transcript5782/f12p0/5066	transcript_HQ_South_transcript/40338/f2p0/1409	0.03132	0.0011	0.0338	0.00055	0.0169
OG08477	transcript_HQ_North_transcript34210/f2p0/2518	transcript_HQ_South_transcript/40416/f2p0/1391	NA	0	0	NA	NA
OG08479	transcript_HQ_North_transcript37817/f3p0/2303	transcript_HQ_South_transcript/29992/f3p0/2029	0.27314	0.0031	0.0113	0.00155	0.00565
OG08480	transcript_HQ_North_transcript8842/f78p0/4502	transcript_HQ_South_transcript/1945/f9p0/5052	0.22491	0.0032	0.0143	0.0016	0.00715
OG08481	transcript_HQ_North_transcript15570/f2p0/3814	transcript_HQ_South_transcript/6495/f2p0/3829	0.21804	0.0053	0.0243	0.00265	0.01215
OG08482	transcript_HQ_North_transcript6113/f15p0/4856	transcript_HQ_South_transcript/2356/f4p0/4860	NA	0.0008	0	0.0004	NA
OG08485	transcript_HQ_North_transcript46940/f4p0/692	transcript_HQ_South_transcript/48358/f111p0/694	0.06471	0.0045	0.0696	0.00225	0.0348
OG08486	transcript_HQ_North_transcript25771/f8p0/3077	transcript_HQ_South_transcript/13877/f3p0/3074	0.34834	0.0011	0.0032	0.00055	0.0016
OG08487	transcript_HQ_North_transcript46492/f3p0/1144	transcript_HQ_South_transcript/43627/f9p0/1141	0.76743	0.0118	0.0154	0.0059	0.0077
OG08489	transcript_HQ_North_transcript35075/f4p0/2450	transcript_HQ_South_transcript/21924/f3p0/2494	0.14106	0.001	0.0069	0.0005	0.00345
OG08490	transcript_HQ_North_transcript10819/f2p0/4309	transcript_HQ_South_transcript/41875/f6p0/1296	0.35628	0.004	0.0113	0.002	0.00565
OG08491	transcript_HQ_North_transcript13583/f2p0/3996	transcript_HQ_South_transcript/6569/f5p0/3812	0.42422	0.0057	0.0133	0.0028	0.00665
OG08493	transcript_HQ_North_transcript17478/f7p0/3640	transcript_HQ_South_transcript/8286/f2p0/3607	0.12344	0.0057	0.0465	0.00285	0.0232
OG08496	transcript_HQ_North_transcript7165/f15p0/4800	transcript_HQ_South_transcript/2504/f6p0/4781	0.02356	0.0017	0.0733	0.00085	0.0366
OG08497	transcript_HQ_North_transcript12262/f6p0/4098	transcript_HQ_South_transcript/326/f4p0/6828	0.18179	0.0022	0.0121	0.0011	0.006
OG08498	transcript_HQ_North_transcript43494/f11p0/1700	transcript_HQ_South_transcript/35823/f4p0/1682	NA	0	0	NA	NA
OG08503	transcript_HQ_North_transcript10481/f2p0/4305	transcript_HQ_South_transcript/4497/f2p0/4241	0.39158	0.2692	0.6874	0.13455	0.34375
OG08504	transcript_HQ_North_transcript18081/f2p0/3613	transcript_HQ_South_transcript/36976/f2p0/1615	0.14029	0.3417	2.4356	0.17085	1.2178
OG08505	transcript_HQ_North_transcript14853/f2p0/3882	transcript_HQ_South_transcript/14290/f7p0/3008	0.19839	0.0026	0.013	0.00125	0.0065
OG08506	transcript_HQ_North_transcript34408/f19p0/2490	transcript_HQ_South_transcript/21835/f9p0/2494	0.33078	0.0015	0.0047	0.00075	0.00235
OG08508	transcript_HQ_North_transcript16599/f2p0/3725	transcript_HQ_South_transcript/24696/f2p0/2330	0.4047	0.0101	0.0249	0.00505	0.01245
OG08510	transcript_HQ_North_transcript17020/f69p0/3682	transcript_HQ_South_transcript/7467/f6p0/3697	0.09541	0.0059	0.0616	0.0029	0.0308
OG08511	transcript_HQ_North_transcript41502/f8p0/1933	transcript_HQ_South_transcript/30873/f9p0/1932	0	0	0.0046	NA	0.0023
OG08512	transcript_HQ_North_transcript34002/f9p0/2542	transcript_HQ_South_transcript/21072/f4p0/2547	0	0	0.0265	NA	0.01325
OG08513	transcript_HQ_North_transcript37395/f2p0/2311	transcript_HQ_South_transcript/24940/f4p0/2320	0	0	0.0022	NA	0.0011
OG08514	transcript_HQ_North_transcript15494/f2p0/3822	transcript_HQ_South_transcript/26287/f14p0/2219	0.13533	0.0042	0.0313	0.0021	0.01565
OG08515	transcript_HQ_North_transcript46702/f2p0/1033	transcript_HQ_South_transcript/45404/f4p0/1021	0.2045	0.0054	0.0264	0.0027	0.0132
OG08518	transcript_HQ_North_transcript20422/f11p0/3362	transcript_HQ_South_transcript/10101/f14p0/3376	0	0	0.0089	NA	0.00445
OG08519	transcript_HQ_North_transcript36684/f4p0/2356	transcript_HQ_South_transcript/24169/f3p0/2365	0.09627	0.0013	0.0131	0.00065	0.00655
OG08522	transcript_HQ_North_transcript10957/f27p0/4061	transcript_HQ_South_transcript/4822/f3p0/4110	0.42699	0.0093	0.0219	0.0047	0.01095
OG08523	transcript_HQ_North_transcript23122/f2p0/3279	transcript_HQ_South_transcript/4533/f3p0/4193	0.06414	0.0006	0.0087	0.00025	0.00435
OG08524	transcript_HQ_North_transcript33470/f20p0/2536	transcript_HQ_South_transcript/21263/f11p0/2492	0.22447	0.0088	0.0393	0.0044	0.0196
OG08526	transcript_HQ_North_transcript42827/f3p0/1853	transcript_HQ_South_transcript/33637/f2p0/1804	0.29774	0.0124	0.0417	0.00625	0.0209
OG08529	transcript_HQ_North_transcript37924/f43p0/2257	transcript_HQ_South_transcript/25722/f17p0/2246	0	0	0.0115	NA	0.00575
OG08530	transcript_HQ_North_transcript4382/f2p0/5453	transcript_HQ_South_transcript/1402/f4p0/5455	0.3074	0.0045	0.0146	0.00225	0.0073
OG08532	transcript_HQ_North_transcript45284/f3p0/1478	transcript_HQ_South_transcript/37133/f2p0/1600	0.35503	0.017	0.0479	0.0085	0.02395
OG08533	transcript_HQ_North_transcript7875/f20p0/4673	transcript_HQ_South_transcript/2656/f3p0/4680	0.05417	0.0016	0.0289	0.00075	0.01445
OG08535	transcript_HQ_North_transcript20942/f2p0/3420	transcript_HQ_South_transcript/10105/f2p0/3405	0.22794	0.0077	0.0337	0.00385	0.01685
OG08536	transcript_HQ_North_transcript36272/f2p0/2417	transcript_HQ_South_transcript/17562/f6p0/2789	NA	0	0	NA	NA
OG08538	transcript_HQ_North_transcript22640/f2p0/3291	transcript_HQ_South_transcript/16094/f2p0/2886	NA	0.0044	0	0.0022	NA
OG08540	transcript_HQ_North_transcript399/f6p0/7538	transcript_HQ_South_transcript/18837/f2p0/2723	0.05004	0.0007	0.0146	0.00035	0.0073
OG08542	transcript_HQ_North_transcript26683/f2p0/3023	transcript_HQ_South_transcript/16418/f2p0/2834	0.48352	0.0041	0.0084	0.00205	0.0042
OG08543	transcript_HQ_North_transcript20899/f39p0/3369	transcript_HQ_South_transcript/1309/f2p0/5531	0.38702	0.0071	0.0183	0.0035	0.00915
OG08544	transcript_HQ_North_transcript35957/f3p0/2413	transcript_HQ_South_transcript/22812/f4p0/2430	0.13341	0.0042	0.0318	0.0021	0.0159
OG08545	transcript_HQ_North_transcript17007/f11p0/3678	transcript_HQ_South_transcript/7258/f11p0/3675	0.17561	0.0076	0.0431	0.00375	0.02155
OG08546	transcript_HQ_North_transcript44203/f2p0/1646	transcript_HQ_South_transcript/36414/f14p0/1550	NA	0	0	NA	NA
OG08547	transcript_HQ_North_transcript9627/f2p0/4424	transcript_HQ_South_transcript/5177/f3p0/4036	0.06275	0.0005	0.0077	0.00025	0.00385
OG08548	transcript_HQ_North_transcript35138/f5p0/2469	transcript_HQ_South_transcript/19616/f3p0/2639	0	0	0.0532	NA	0.0266
OG08549	transcript_HQ_North_transcript22348/f19p0/3296	transcript_HQ_South_transcript/11063/f8p0/3296	0.10098	0.0019	0.019	0.00095	0.0095
OG08550	transcript_HQ_North_transcript38868/f9p0/2137	transcript_HQ_South_transcript/27779/f2p0/2134	0.26547	0.012	0.0451	0.006	0.02255
OG08552	transcript_HQ_North_transcript14139/f4p0/3940	transcript_HQ_South_transcript/10874/f22p0/3275	0.80551	0.0159	0.0197	0.00795	0.00985
OG08553	transcript_HQ_North_transcript34946/f2p0/2509	transcript_HQ_South_transcript/25001/f5p0/2284	NA	0.0194	0	0.0097	NA
OG08554	transcript_HQ_North_transcript40147/f11p0/2079	transcript_HQ_South_transcript/29031/f5p0/2073	0	0	0.0087	NA	0.00435
OG08556	transcript_HQ_North_transcript24018/f4p0/3191	transcript_HQ_South_transcript/9587/f2p0/3208	0	0	0.012	NA	0.006
OG08558	transcript_HQ_North_transcript39531/f29p0/1977	transcript_HQ_South_transcript/29827/f62p0/1983	0.11468	0.0016	0.014	0.0008	0.007
OG08559	transcript_HQ_North_transcript42963/f56p0/1753	transcript_HQ_South_transcript/33709/f31p0/1766	0.24831	0.0089	0.0356	0.0044	0.0178
OG08560	transcript_HQ_North_transcript7607/f4p0/4723	transcript_HQ_South_transcript/2902/f2p0/4633	0.36302	0.0082	0.0225	0.0041	0.01125
OG08562	transcript_HQ_North_transcript42917/f3p0/1828	transcript_HQ_South_transcript/8791/f3p0/3524	0.46429	0.004	0.0086	0.00195	0.0043
OG08563	transcript_HQ_North_transcript27709/f4p0/2967	transcript_HQ_South_transcript/23115/f4p0/2417	0.21344	0.0117	0.0546	0.00585	0.0273
OG08564	transcript_HQ_North_transcript26452/f2p0/3050	transcript_HQ_South_transcript/27721/f2p0/2192	0.01942	0.0008	0.0435	0.00045	0.02175
OG08568	transcript_HQ_North_transcript46327/f8p0/1214	transcript_HQ_South_transcript/43072/f16p0/1205	1.21255	0.0184	0.0152	0.0092	0.0076
OG08569	transcript_HQ_North_transcript21728/f2p0/3418	transcript_HQ_South_transcript/10135/f2p0/3392	0.55899	0.0118	0.0211	0.0059	0.0106
OG08570	transcript_HQ_North_transcript45859/f2p0/1342	transcript_HQ_South_transcript/34972/f6p0/1670	0.82448	0.0069	0.0083	0.00345	0.00415
OG08571	transcript_HQ_North_transcript28750/f2p0/2913	transcript_HQ_South_transcript/18216/f2p0/2751	0.49105	0.0124	0.0253	0.00625	0.0127
OG08573	transcript_HQ_North_transcript14589/f3p0/3902	transcript_HQ_South_transcript/8973/f21p0/3503	0.05999	0.0061	0.1017	0.00305	0.05085
OG08574	transcript_HQ_North_transcript43267/f2p0/1774	transcript_HQ_South_transcript/37426/f4p0/1577	0.07463	0.0009	0.0121	0.00045	0.00605
OG08577	transcript_HQ_North_transcript42357/f2p0/1889	transcript_HQ_South_transcript/27688/f3p0/2142	0.33191	0.0129	0.0389	0.00645	0.01945
OG08579	transcript_HQ_North_transcript8136/f4p0/4660	transcript_HQ_South_transcript/3056/f2p0/4580	0.30322	0.0028	0.0094	0.0014	0.0047
OG08580	transcript_HQ_North_transcript45039/f5p0/1499	transcript_HQ_South_transcript/38253/f35p0/1478	0	0	0.0308	NA	0.0154
OG08581	transcript_HQ_North_transcript22218/f3p0/3307	transcript_HQ_South_transcript/12510/f2p0/3160	0.15752	0.0028	0.0181	0.00145	0.00905
OG08582	transcript_HQ_North_transcript540/f3p0/7257	transcript_HQ_South_transcript/6084/f3p0/3885	0.34538	0.004	0.0115	0.002	0.0057
OG08584	transcript_HQ_North_transcript25076/f100p0/3040	transcript_HQ_South_transcript/13513/f27p0/3045	0.11565	0.0073	0.0631	0.00365	0.03155
OG08586	transcript_HQ_North_transcript42378/f10p0/1859	transcript_HQ_South_transcript/21716/f4p0/2494	1.82904	0.0131	0.0072	0.0066	0.00355
OG08587	transcript_HQ_North_transcript46803/f4p0/939	transcript_HQ_South_transcript/45538/f2p0/1053	0.00174	0.0027	1.5259	0.00135	0.76295
OG11625	transcript_HQ_North_transcript18285/f2p0/3581	transcript_HQ_South_transcript/25382/f4p0/2240	0.04874	0.0006	0.0132	0.00035	0.0066
OG11626	transcript_HQ_North_transcript28629/f2p0/2903	transcript_HQ_South_transcript/45467/f2p0/1019	0.00142	0.247	174.543	0.1235	87.2716
OG11627	transcript_HQ_North_transcript31350/f6p0/2733	transcript_HQ_South_transcript/18041/f3p0/2740	NA	0	0	NA	NA
OG11629	transcript_HQ_North_transcript29630/f2p0/2837	transcript_HQ_South_transcript/19647/f2p0/2650	0	0	0.0045	NA	0.00225
OG11630	transcript_HQ_North_transcript28643/f2p0/2945	transcript_HQ_South_transcript/17777/f2p0/2759	NA	0.0033	0	0.00165	NA
OG11631	transcript_HQ_North_transcript29644/f9p0/2838	transcript_HQ_South_transcript/17039/f2p0/2816	0.07908	0.0029	0.0366	0.00145	0.0183
OG11632	transcript_HQ_North_transcript37542/f99p0/2258	transcript_HQ_South_transcript/25413/f9p0/2249	0	0	0.0178	NA	0.0089
OG11633	transcript_HQ_North_transcript41597/f2p0/1949	transcript_HQ_South_transcript/29103/f2p0/2062	0.32273	0.0683	0.2116	0.0341	0.1058
OG11634	transcript_HQ_North_transcript42482/f4p0/1798	transcript_HQ_South_transcript/29122/f2p0/2059	0.33135	0.0253	0.0762	0.0126	0.0381
OG11635	transcript_HQ_North_transcript30530/f11p0/2768	transcript_HQ_South_transcript/17751/f4p0/2755	0.04273	0.0016	0.0367	0.0008	0.01835
OG11636	transcript_HQ_North_transcript40907/f3p0/2015	transcript_HQ_South_transcript/30027/f2p0/2015	0.94721	0.0236	0.0249	0.0118	0.01245
OG11637	transcript_HQ_North_transcript4600/f2p0/5382	transcript_HQ_South_transcript/30925/f3p0/1961	0.17673	0.0048	0.027	0.0024	0.0135
OG11638	transcript_HQ_North_transcript44970/f5p0/1537	transcript_HQ_South_transcript/30930/f20p0/1947	0.22404	0.0156	0.0694	0.0078	0.0347
OG11641	transcript_HQ_North_transcript31425/f2p0/2732	transcript_HQ_South_transcript/25645/f11p0/2237	0.18741	0.0089	0.0475	0.0045	0.02375
OG11643	transcript_HQ_North_transcript29727/f2p0/2855	transcript_HQ_South_transcript/16943/f2p0/2821	0	0	0.0152	NA	0.0076
OG11646	transcript_HQ_North_transcript40746/f21p0/2017	transcript_HQ_South_transcript/30068/f3p0/2007	NA	0	0	NA	NA
OG11649	transcript_HQ_North_transcript24317/f5p0/3167	transcript_HQ_South_transcript/28276/f2p0/2123	0	0	0.0128	NA	0.0064
OG11650	transcript_HQ_North_transcript30598/f6p0/2774	transcript_HQ_South_transcript/13468/f4p0/3088	0.69357	0.0156	0.0224	0.00775	0.01125
OG11651	transcript_HQ_North_transcript41124/f3p0/1965	transcript_HQ_South_transcript/30966/f3p0/1962	0.74577	0.0058	0.0078	0.00295	0.00395
OG11652	transcript_HQ_North_transcript30601/f6p0/2759	transcript_HQ_South_transcript/17040/f8p0/2759	0.18458	0.0099	0.0538	0.005	0.0269
OG11655	transcript_HQ_North_transcript39170/f4p0/2155	transcript_HQ_South_transcript/27406/f14p0/2147	0.17809	0.0034	0.0191	0.0017	0.00955
OG11657	transcript_HQ_North_transcript8585/f4p0/4551	transcript_HQ_South_transcript/31/f2p0/8452	0.80912	0.0883	0.1091	0.04415	0.05455
OG11658	transcript_HQ_North_transcript41172/f22p0/1955	transcript_HQ_South_transcript/31002/f14p0/1950	0.52574	0.0045	0.0086	0.0023	0.0043
OG11659	transcript_HQ_North_transcript29811/f3p0/2832	transcript_HQ_South_transcript/19229/f2p0/2680	0.30877	0.0222	0.072	0.01115	0.036
OG11660	transcript_HQ_North_transcript31524/f3p0/2718	transcript_HQ_South_transcript/25271/f12p0/2282	0	0	0.0296	NA	0.0148
OG11661	transcript_HQ_North_transcript40080/f27p0/1996	transcript_HQ_South_transcript/30135/f18p0/1990	0.19346	0.0035	0.0181	0.00175	0.00905
OG11662	transcript_HQ_North_transcript40493/f2p0/2068	transcript_HQ_South_transcript/29247/f3p0/2073	NA	0	0	NA	NA
OG11663	transcript_HQ_North_transcript44050/f6p0/1664	transcript_HQ_South_transcript/31028/f29p0/1929	0.08447	0.0042	0.0501	0.0021	0.02505
OG11667	transcript_HQ_North_transcript36840/f2p0/2355	transcript_HQ_South_transcript/26536/f2p0/2212	0	0	0.0056	NA	0.0028
OG11668	transcript_HQ_North_transcript38922/f3p0/2178	transcript_HQ_South_transcript/27458/f5p0/2176	1.17342	0.0054	0.0046	0.0027	0.0023
OG11669	transcript_HQ_North_transcript31575/f2p0/2722	transcript_HQ_South_transcript/19402/f2p0/2657	0.18442	0.0062	0.0336	0.0031	0.0168
OG11670	transcript_HQ_North_transcript28007/f7p0/2923	transcript_HQ_South_transcript/15475/f2p0/2929	0	0	0.0096	NA	0.0048
OG11672	transcript_HQ_North_transcript2986/f3p0/5968	transcript_HQ_South_transcript/7505/f8p0/3694	0.00209	0.2564	122.594	0.1282	61.297
OG11673	transcript_HQ_North_transcript29868/f2p0/2841	transcript_HQ_South_transcript/16988/f3p0/2806	0.58656	0.0036	0.0061	0.0018	0.00305
OG11674	transcript_HQ_North_transcript40169/f2p0/2086	transcript_HQ_South_transcript/29295/f3p0/2002	0.63464	0.0611	0.0962	0.03055	0.0481
OG11676	transcript_HQ_North_transcript19681/f2p0/3485	transcript_HQ_South_transcript/28389/f4p0/2094	0.11885	0.0012	0.0104	0.0006	0.0052
OG11678	transcript_HQ_North_transcript31603/f48p0/2656	transcript_HQ_South_transcript/18702/f26p0/2654	0	0	0.0103	NA	0.00515
OG11679	transcript_HQ_North_transcript38406/f2p0/2242	transcript_HQ_South_transcript/26575/f3p0/2206	3.45487	0.0111	0.0032	0.0055	0.0016
OG11681	transcript_HQ_North_transcript31607/f2p0/2716	transcript_HQ_South_transcript/18843/f2p0/2716	0	0	0.0052	NA	0.0026
OG11682	transcript_HQ_North_transcript18710/f2p0/3559	transcript_HQ_South_transcript/30203/f2p0/2001	NA	0.0102	0	0.0051	NA
OG11683	transcript_HQ_North_transcript31610/f3p0/2730	transcript_HQ_South_transcript/18038/f5p0/2734	0	0	0.0023	NA	0.00115
OG11685	transcript_HQ_North_transcript40589/f4p0/2043	transcript_HQ_South_transcript/30211/f5p0/2001	0.29031	0.0085	0.0294	0.0043	0.01465
OG11686	transcript_HQ_North_transcript40991/f4p0/2020	transcript_HQ_South_transcript/30214/f9p0/2003	2.33366	0.0098	0.0042	0.0049	0.0021
OG11688	transcript_HQ_North_transcript33048/f2p0/2627	transcript_HQ_South_transcript/26589/f18p0/2205	NA	0.0021	0	0.00105	NA
OG11690	transcript_HQ_North_transcript15641/f6p0/3786	transcript_HQ_South_transcript/6848/f3p0/3783	NA	0	0	NA	NA
OG11691	transcript_HQ_North_transcript19275/f2p0/3429	transcript_HQ_South_transcript/3112/f12p0/4572	0	0	0.0271	NA	0.0136
OG11692	transcript_HQ_North_transcript28065/f2p0/2942	transcript_HQ_South_transcript/16276/f3p0/2873	0.45412	0.0111	0.0245	0.00555	0.0122
OG11693	transcript_HQ_North_transcript27206/f17p0/2988	transcript_HQ_South_transcript/14457/f95p0/2956	0.06499	0.0014	0.0221	0.0007	0.01105
OG11695	transcript_HQ_North_transcript28093/f2p0/2923	transcript_LQ_South_transcript/30041/f4p0/1987	0.54651	0.0104	0.0191	0.0052	0.00955
OG11696	transcript_HQ_North_transcript27225/f5p0/2982	transcript_HQ_South_transcript/15397/f2p0/2940	1.45654	0.0103	0.007	0.00515	0.0035
OG11698	transcript_HQ_North_transcript40690/f6p0/2040	transcript_HQ_South_transcript/29367/f7p0/2048	0.07281	0.0031	0.0427	0.00155	0.0214
OG11699	transcript_HQ_North_transcript38773/f38p0/2196	transcript_HQ_South_transcript/26631/f19p0/2199	0.15945	0.0123	0.0769	0.00615	0.0385
OG11700	transcript_HQ_North_transcript40910/f5p0/1997	transcript_HQ_South_transcript/30264/f11p0/1996	0.21348	0.0041	0.019	0.00205	0.0095
OG11701	transcript_HQ_North_transcript31665/f2p0/2723	transcript_HQ_South_transcript/40368/f2p0/1406	1.68396	0.0077	0.0045	0.00385	0.00225
OG11702	transcript_HQ_North_transcript40578/f3p0/2055	transcript_HQ_South_transcript/27565/f4p0/2157	0.40527	0.0242	0.0598	0.01215	0.0299
OG11703	transcript_HQ_North_transcript31670/f3p0/2707	transcript_HQ_South_transcript/23914/f2p0/2392	0	0	0.0199	NA	0.00995
OG11704	transcript_HQ_North_transcript5747/f5p0/5099	transcript_HQ_South_transcript/26661/f3p0/2210	0	0	0.0205	NA	0.01025
OG11709	transcript_HQ_North_transcript39289/f14p0/2152	transcript_HQ_South_transcript/27606/f3p0/2160	1.97909	0.0203	0.0103	0.01015	0.00515
OG11711	transcript_HQ_North_transcript41445/f4p0/1959	transcript_HQ_South_transcript/28502/f2p0/2096	NA	0.0099	0	0.00495	NA
OG11712	transcript_HQ_North_transcript19842/f5p0/3472	transcript_HQ_South_transcript/9018/f2p0/3501	1.14672	0.0058	0.0051	0.00295	0.00255
OG11714	transcript_HQ_North_transcript39340/f10p0/2128	transcript_HQ_South_transcript/27625/f3p0/2173	0.17357	0.0206	0.1184	0.0103	0.0592
OG11715	transcript_HQ_North_transcript28196/f3p0/2957	transcript_HQ_South_transcript/25005/f2p0/2307	NA	0.0034	0	0.0017	NA
OG11717	transcript_HQ_North_transcript25854/f5p0/3075	transcript_HQ_South_transcript/27631/f2p0/2158	0.48488	0.0026	0.0053	0.0013	0.00265
OG11718	transcript_HQ_North_transcript30042/f7p0/2802	transcript_HQ_South_transcript/17044/f24p0/2795	NA	0	0	NA	NA
OG11722	transcript_HQ_North_transcript8661/f75p0/4420	transcript_HQ_South_transcript/2947/f2p0/4627	0.79502	0.0072	0.0091	0.0036	0.00455
OG11723	transcript_HQ_North_transcript39802/f2p0/2108	transcript_HQ_South_transcript/28547/f3p0/2096	0.29663	0.0055	0.0184	0.00275	0.0092
OG11727	transcript_HQ_North_transcript31900/f2p0/2693	transcript_HQ_South_transcript/18182/f2p0/2754	0.36921	0.0093	0.0252	0.0047	0.0126
OG11728	transcript_HQ_North_transcript30941/f4p0/2751	transcript_HQ_South_transcript/30532/f2p0/1992	0.3665	0.0097	0.0265	0.00485	0.0133
OG11730	transcript_HQ_North_transcript31918/f2p0/2690	transcript_HQ_South_transcript/12936/f3p0/3149	2.09033	0.0036	0.0017	0.0018	0.00085
OG11731	transcript_HQ_North_transcript29041/f2p0/2893	transcript_HQ_South_transcript/16617/f2p0/2846	NA	0.0016	0	0.0008	NA
OG11732	transcript_HQ_North_transcript29042/f2p0/2822	transcript_HQ_South_transcript/38204/f3p0/1546	0	0	0.0027	NA	0.00135
OG11734	transcript_HQ_North_transcript41725/f15p0/1926	transcript_HQ_South_transcript/31307/f19p0/1921	1.72612	0.0084	0.0048	0.0042	0.00245
OG11735	transcript_HQ_North_transcript32831/f51p0/2620	transcript_HQ_South_transcript/32734/f3p0/1864	NA	0.0283	0	0.01415	NA
OG11737	transcript_HQ_North_transcript40651/f3p0/2045	transcript_HQ_South_transcript/29511/f2p0/2042	0.39868	0.0119	0.0297	0.00595	0.01485
OG11738	transcript_HQ_North_transcript3196/f2p0/5863	transcript_HQ_South_transcript/21037/f4p0/2504	0.04553	0.0012	0.0268	0.00065	0.01335
OG11739	transcript_HQ_North_transcript6615/f2p0/4930	transcript_HQ_South_transcript/10508/f4p0/3312	3.04829	0.0092	0.003	0.0046	0.0015
OG11740	transcript_HQ_North_transcript17803/f4p0/3625	transcript_HQ_South_transcript/8136/f4p0/3613	0	0	0.0049	NA	0.0024
OG11742	transcript_HQ_North_transcript31838/f2p0/2701	transcript_HQ_South_transcript/10409/f2p0/3371	0.33588	0.026	0.0773	0.013	0.03865
OG11745	transcript_HQ_North_transcript18733/f3p0/3473	transcript_HQ_South_transcript/29542/f2p0/2074	0.23187	0.0039	0.0167	0.00195	0.00835
OG11746	transcript_HQ_North_transcript32874/f8p0/2563	transcript_HQ_South_transcript/18668/f2p0/2706	0.28718	0.0016	0.0054	0.0008	0.00275
OG11747	transcript_HQ_North_transcript20782/f2p0/3408	transcript_HQ_South_transcript/9820/f3p0/3423	0	0	0.0261	NA	0.013
OG11748	transcript_HQ_North_transcript40527/f2p0/2063	transcript_HQ_South_transcript/28634/f4p0/2077	0	0	0.0978	NA	0.0489
OG11750	transcript_HQ_North_transcript29103/f10p0/2873	transcript_HQ_South_transcript/16307/f5p0/2877	0.29706	0.0242	0.0814	0.01205	0.0407
OG11752	transcript_HQ_North_transcript29106/f5p0/2875	transcript_HQ_South_transcript/12067/f3p0/3242	NA	0.0092	0	0.0046	NA
OG11753	transcript_HQ_North_transcript33765/f4p0/2565	transcript_HQ_South_transcript/20684/f3p0/2566	0	0	0.0144	NA	0.0072
OG11755	transcript_HQ_North_transcript31872/f2p0/2692	transcript_HQ_South_transcript/18750/f7p0/2692	0	0	0.0063	NA	0.00315
OG11758	transcript_HQ_North_transcript3468/f2p0/5754	transcript_HQ_South_transcript/2352/f2p0/4867	0.65663	0.002	0.003	0.001	0.0015
OG11759	transcript_HQ_North_transcript33793/f3p0/2447	transcript_HQ_South_transcript/22611/f6p0/2457	0	0	0.0154	NA	0.0077
OG11760	transcript_HQ_North_transcript23950/f2p0/3211	transcript_HQ_South_transcript/30479/f2p0/1983	0.52895	0.2805	0.5303	0.14025	0.26515
OG11761	transcript_HQ_North_transcript25938/f3p0/3078	transcript_HQ_South_transcript/28673/f2p0/2107	NA	0.0057	0	0.00285	NA
OG11763	transcript_HQ_North_transcript15680/f41p0/3728	transcript_HQ_South_transcript/7189/f15p0/3725	0.18582	0.0007	0.0038	0.00035	0.00195
OG11764	transcript_HQ_North_transcript39489/f3p0/2155	transcript_HQ_South_transcript/28687/f2p0/2094	0.07768	0.003	0.0392	0.00155	0.0196
OG11765	transcript_HQ_North_transcript29161/f62p0/2694	transcript_HQ_South_transcript/13903/f3p0/3048	0.49667	0.0076	0.0153	0.0038	0.00765
OG11767	transcript_HQ_North_transcript33813/f2p0/2552	transcript_HQ_South_transcript/19896/f6p0/2620	NA	0.0309	0	0.01545	NA
OG11768	transcript_HQ_North_transcript40293/f5p0/2085	transcript_HQ_South_transcript/28702/f5p0/2088	0.49013	0.01	0.0203	0.00495	0.01015
OG11770	transcript_HQ_North_transcript38939/f2p0/2205	transcript_HQ_South_transcript/26872/f4p0/2185	1.07849	0.0108	0.01	0.0054	0.005
OG11771	transcript_HQ_North_transcript32079/f2p0/2674	transcript_HQ_South_transcript/20718/f5p0/2558	0.89343	0.0297	0.0333	0.01485	0.01665
OG11773	transcript_HQ_North_transcript32959/f9p0/2581	transcript_HQ_South_transcript/20443/f14p0/2574	0.17297	0.0042	0.0245	0.0021	0.0122
OG11774	transcript_HQ_North_transcript41953/f5p0/1914	transcript_HQ_South_transcript/31454/f4p0/1928	0.41944	0.0036	0.0085	0.0018	0.00425
OG11775	transcript_HQ_North_transcript41194/f3p0/1996	transcript_HQ_South_transcript/30536/f5p0/1991	1.62348	0.0074	0.0046	0.0037	0.00225
OG11777	transcript_HQ_North_transcript42108/f5p0/1900	transcript_HQ_South_transcript/31459/f2p0/1928	0	0	0.0046	NA	0.0023
OG11783	transcript_HQ_North_transcript25310/f3p0/3131	transcript_HQ_South_transcript/31479/f2p0/1926	0.32247	0.0842	0.261	0.0421	0.13055
OG11784	transcript_HQ_North_transcript33874/f2p0/2559	transcript_HQ_South_transcript/42658/f2p0/1253	NA	0	0	NA	NA
OG11785	transcript_HQ_North_transcript39138/f4p0/2174	transcript_HQ_South_transcript/27811/f5p0/2128	0.01432	0.001	0.0669	0.0005	0.0334
OG11786	transcript_HQ_North_transcript40814/f3p0/2031	transcript_HQ_South_transcript/28740/f5p0/2022	0.25112	0.0034	0.0136	0.0017	0.00685
OG11787	transcript_HQ_North_transcript40375/f2p0/2070	transcript_HQ_South_transcript/29658/f3p0/2030	NA	0.0051	0	0.00255	NA
OG11788	transcript_HQ_North_transcript34781/f3p0/2504	transcript_HQ_South_transcript/22109/f2p0/2490	0.07199	0.0014	0.0199	0.0007	0.00995
OG11789	transcript_HQ_North_transcript32144/f3p0/2621	transcript_HQ_South_transcript/19138/f2p0/2712	0.38851	0.0035	0.0091	0.00175	0.00455
OG11790	transcript_HQ_North_transcript33007/f3p0/2625	transcript_HQ_South_transcript/19562/f2p0/2639	0	0	0.0422	NA	0.0211
OG11791	transcript_HQ_North_transcript40378/f3p0/2023	transcript_HQ_South_transcript/28766/f10p0/2018	0	0	0.0045	NA	0.00225
OG11792	transcript_HQ_North_transcript33905/f42p0/2447	transcript_HQ_South_transcript/38040/f2p0/1549	0.67049	0.0354	0.0527	0.01765	0.02635
OG11793	transcript_HQ_North_transcript33917/f4p0/2548	transcript_HQ_South_transcript/35262/f2p0/1738	0.09425	0.0026	0.0275	0.0013	0.01375
OG11794	transcript_HQ_North_transcript46582/f7p0/1044	transcript_HQ_South_transcript/31534/f50p0/1856	0	0	0.0072	NA	0.0036
OG11795	transcript_HQ_North_transcript41764/f3p0/1930	transcript_HQ_South_transcript/31539/f3p0/1936	0.1371	0.0014	0.01	0.0007	0.005
OG11797	transcript_HQ_North_transcript40675/f2p0/2040	transcript_HQ_South_transcript/29708/f7p0/2033	0	0	0.0326	NA	0.0163
OG11798	transcript_HQ_North_transcript14185/f2p0/3970	transcript_HQ_South_transcript/27870/f2p0/2137	1.57582	0.0134	0.0085	0.0067	0.00425
OG11799	transcript_HQ_North_transcript41019/f4p0/2007	transcript_HQ_South_transcript/27871/f17p0/1979	0	0	0.0245	NA	0.0123
OG11800	transcript_HQ_North_transcript44651/f2p0/1581	transcript_HQ_South_transcript/30618/f2p0/1976	2.39714	0.0203	0.0085	0.0102	0.00425
OG11801	transcript_HQ_North_transcript34835/f22p0/2436	transcript_HQ_South_transcript/22142/f7p0/2434	0	0	0.0108	NA	0.0054
OG11802	transcript_HQ_North_transcript33061/f2p0/2609	transcript_HQ_South_transcript/18240/f2p0/2741	0.39893	0.0156	0.039	0.0078	0.0195
OG11804	transcript_HQ_North_transcript41035/f2p0/2009	transcript_HQ_South_transcript/29745/f13p0/2021	0.34082	0.0124	0.0364	0.0062	0.01825
OG11805	transcript_HQ_North_transcript33462/f4p0/2581	transcript_HQ_South_transcript/2975/f9p0/4619	0.51154	0.0039	0.0077	0.00195	0.00385
OG11806	transcript_HQ_North_transcript34874/f2p0/2489	transcript_HQ_South_transcript/38484/f4p0/1463	2.22203	0.0252	0.0113	0.01255	0.00565
OG11807	transcript_HQ_North_transcript38886/f3p0/2194	transcript_HQ_South_transcript/27908/f2p0/2163	0.54552	0.0028	0.0051	0.0014	0.00255
OG11808	transcript_HQ_North_transcript10998/f2p0/4273	transcript_HQ_South_transcript/28845/f4p0/2019	0.25367	0.0013	0.0051	0.00065	0.00255
OG11810	transcript_HQ_North_transcript42047/f2p0/1961	transcript_HQ_South_transcript/27007/f2p0/2193	NA	0.0042	0	0.0021	NA
OG11812	transcript_HQ_North_transcript40712/f36p0/2026	transcript_HQ_South_transcript/29775/f22p0/2016	0.09327	0.0028	0.0298	0.0014	0.0149
OG11815	transcript_HQ_North_transcript39650/f2p0/2130	transcript_HQ_South_transcript/31624/f2p0/1924	0	0	0.0116	NA	0.0058
OG11816	transcript_HQ_North_transcript42125/f2p0/1896	transcript_HQ_South_transcript/30699/f3p0/1983	0.35416	0.0096	0.027	0.0048	0.0135
OG11819	transcript_HQ_North_transcript40963/f5p0/2004	transcript_HQ_South_transcript/29807/f15p0/1988	0.13922	0.0055	0.0392	0.0027	0.0196
OG11822	transcript_HQ_North_transcript35746/f5p0/2433	transcript_HQ_South_transcript/36135/f2p0/1665	2.32036	0.0232	0.01	0.0116	0.005
OG11823	transcript_HQ_North_transcript38471/f4p0/2224	transcript_HQ_South_transcript/29824/f2p0/2035	0.37027	0.0205	0.0554	0.01025	0.0277
OG11824	transcript_HQ_North_transcript41945/f2p0/1918	transcript_HQ_South_transcript/30725/f2p0/1972	0.16806	0.0028	0.0167	0.0014	0.0083
OG11825	transcript_HQ_North_transcript40933/f12p0/1984	transcript_HQ_South_transcript/29832/f29p0/2004	0.92179	0.0095	0.0103	0.00475	0.00515
OG11826	transcript_HQ_North_transcript24398/f3p0/3162	transcript_HQ_South_transcript/31689/f2p0/1910	0	0	0.0019	NA	0.00095
OG11827	transcript_HQ_North_transcript7586/f3p0/4744	transcript_HQ_South_transcript/7219/f2p0/3759	1.34686	0.0132	0.0098	0.0066	0.0049
OG11829	transcript_HQ_North_transcript34982/f3p0/2487	transcript_HQ_South_transcript/21930/f3p0/2489	0.53748	0.0115	0.0215	0.00575	0.0107
OG11830	transcript_HQ_North_transcript34070/f2p0/2545	transcript_HQ_South_transcript/22139/f6p0/2456	0.33085	0.0073	0.0221	0.00365	0.01105
OG11831	transcript_HQ_North_transcript34075/f2p0/2546	transcript_HQ_South_transcript/25183/f4p0/2294	0	0	0.0096	NA	0.0048
OG11833	transcript_HQ_North_transcript34993/f2p0/2491	transcript_HQ_South_transcript/20012/f6p0/2568	0.55424	0.0045	0.0082	0.00225	0.00405
OG11835	transcript_HQ_North_transcript35813/f9p0/2408	transcript_HQ_South_transcript/27232/f2p0/2190	NA	0	0	NA	NA
OG11837	transcript_HQ_North_transcript33184/f2p0/2623	transcript_HQ_South_transcript/18279/f2p0/2729	0	0	0.0119	NA	0.00595
OG11838	transcript_HQ_North_transcript33186/f2p0/2618	transcript_HQ_South_transcript/42127/f2p0/1288	0.37729	0.0022	0.0058	0.0011	0.0029
OG11839	transcript_HQ_North_transcript32362/f2p0/2648	transcript_HQ_South_transcript/19272/f2p0/2655	0.07686	0.0015	0.0196	0.00075	0.0098
OG11840	transcript_HQ_North_transcript35023/f2p0/2505	transcript_HQ_South_transcript/21400/f38p0/2499	1.73221	0.0292	0.0169	0.01465	0.00845
OG11841	transcript_HQ_North_transcript36753/f2p0/2355	transcript_HQ_South_transcript/24678/f2p0/2318	0.48003	0.026	0.0541	0.013	0.02705
OG11842	transcript_HQ_North_transcript35889/f2p0/2421	transcript_HQ_South_transcript/43780/f2p0/1158	0.00312	0.5298	169.798	0.2649	84.8992
OG11843	transcript_HQ_North_transcript33240/f2p0/2605	transcript_HQ_South_transcript/20337/f5p0/2542	0	0	0.0116	NA	0.00575
OG11844	transcript_HQ_North_transcript35070/f2p0/2487	transcript_HQ_South_transcript/22723/f2p0/2475	0.16883	0.0151	0.0893	0.0075	0.04465
OG11845	transcript_HQ_North_transcript18230/f8p0/3597	transcript_HQ_South_transcript/7788/f2p0/3651	0.54994	0.0077	0.0141	0.00385	0.007
OG11846	transcript_HQ_North_transcript34180/f2p0/2540	transcript_HQ_South_transcript/21191/f3p0/2538	NA	0.0028	0	0.0014	NA
OG11847	transcript_HQ_North_transcript39112/f7p0/2139	transcript_HQ_South_transcript/27206/f3p0/2177	0.42093	0.0228	0.0542	0.01145	0.0271
OG11848	transcript_HQ_North_transcript35923/f17p0/2412	transcript_HQ_South_transcript/1873/f4p0/5097	0	0	0.0194	NA	0.0097
OG11849	transcript_HQ_North_transcript35122/f4p0/2463	transcript_HQ_South_transcript/22382/f5p0/2457	0.14428	0.0057	0.0395	0.00285	0.01975
OG11850	transcript_HQ_North_transcript42763/f7p0/1837	transcript_HQ_South_transcript/32746/f2p0/1864	0.13981	0.0062	0.0445	0.00315	0.02225
OG11851	transcript_HQ_North_transcript32473/f2p0/2637	transcript_HQ_South_transcript/22169/f3p0/2474	0.29043	0.0091	0.0313	0.00455	0.0156
OG11852	transcript_HQ_North_transcript35139/f2p0/2464	transcript_HQ_South_transcript/34100/f2p0/1780	NA	0.0015	0	0.00075	NA
OG11853	transcript_HQ_North_transcript42654/f6p0/1825	transcript_HQ_South_transcript/31884/f2p0/1926	0.40868	0.0076	0.0187	0.0038	0.00935
OG11854	transcript_HQ_North_transcript23475/f2p0/3237	transcript_HQ_South_transcript/32776/f2p0/1865	0.07863	0.002	0.0255	0.001	0.01275
OG11855	transcript_HQ_North_transcript36363/f4p0/2376	transcript_HQ_South_transcript/31888/f2p0/1902	1.48677	0.0224	0.015	0.0112	0.00755
OG11857	transcript_HQ_North_transcript35985/f2p0/2418	transcript_HQ_South_transcript/37089/f4p0/1601	0.02304	0.3723	16.159	0.18615	8.07945
OG11859	transcript_HQ_North_transcript35990/f3p0/2413	transcript_HQ_South_transcript/42727/f9p0/1237	0.2152	0.0213	0.0988	0.0106	0.04945
OG11861	transcript_HQ_North_transcript8925/f5p0/4529	transcript_HQ_South_transcript/3280/f3p0/4525	0.17504	0.0027	0.0155	0.00135	0.00775
OG11862	transcript_HQ_North_transcript32516/f3p0/2650	transcript_HQ_South_transcript/19523/f5p0/2635	0	0	0.0109	NA	0.00545
OG11864	transcript_HQ_North_transcript44191/f2p0/1654	transcript_HQ_South_transcript/36362/f2p0/1659	0.12574	0.0054	0.0433	0.0027	0.02165
OG11866	transcript_HQ_North_transcript32531/f45p0/2620	transcript_HQ_South_transcript/19413/f6p0/2643	0.15821	0.0025	0.0156	0.00125	0.0078
OG11867	transcript_HQ_North_transcript42389/f11p0/1856	transcript_HQ_South_transcript/32838/f3p0/1852	0.6661	0.0103	0.0155	0.00515	0.00775
OG11868	transcript_HQ_North_transcript42607/f5p0/1845	transcript_HQ_South_transcript/32839/f9p0/1846	NA	0	0	NA	NA
OG11869	transcript_LQ_North_transcript1177/f2p0/6931	transcript_LQ_South_transcript/12519/f2p0/3216	0.19343	0.0052	0.0269	0.0026	0.0135
OG11870	transcript_HQ_North_transcript19675/f3p0/3001	transcript_HQ_South_transcript/35542/f4p0/1684	0.63858	0.0041	0.0064	0.00205	0.0032
OG11871	transcript_HQ_North_transcript43964/f10p0/1678	transcript_HQ_South_transcript/35554/f53p0/1667	0.3474	0.0021	0.006	0.00105	0.00305
OG11872	transcript_HQ_North_transcript35271/f2p0/2478	transcript_HQ_South_transcript/10150/f3p0/3392	2.16751	0.0117	0.0054	0.00585	0.0027
OG11873	transcript_HQ_North_transcript43654/f10p0/1717	transcript_HQ_South_transcript/33780/f7p0/1721	0	0	0.0107	NA	0.00535
OG11874	transcript_HQ_North_transcript35279/f2p0/2459	transcript_HQ_South_transcript/34497/f2p0/1762	0.38646	0.0294	0.0762	0.0147	0.0381
OG11876	transcript_HQ_North_transcript42612/f2p0/1848	transcript_HQ_South_transcript/32885/f2p0/1863	0.1737	0.0086	0.0497	0.00435	0.0249
OG11877	transcript_HQ_North_transcript36096/f3p0/2418	transcript_HQ_South_transcript/42225/f13p0/1196	0.14854	0.0046	0.031	0.0023	0.01545
OG11878	transcript_HQ_North_transcript33449/f2p0/2593	transcript_HQ_South_transcript/19877/f2p0/2623	0.31838	0.0108	0.034	0.0054	0.017
OG11880	transcript_HQ_North_transcript36104/f17p0/2374	transcript_HQ_South_transcript/20472/f5p0/2577	0.27327	0.0061	0.0224	0.00305	0.0112
OG11881	transcript_HQ_North_transcript32591/f3p0/2645	transcript_HQ_South_transcript/19634/f4p0/2637	0	0	0.0163	NA	0.00815
OG11882	transcript_HQ_North_transcript43783/f3p0/1707	transcript_HQ_South_transcript/35584/f2p0/1696	0.21094	0.0037	0.0174	0.00185	0.0087
OG11883	transcript_HQ_North_transcript43993/f2p0/1682	transcript_HQ_South_transcript/35586/f4p0/1680	0.72031	0.0227	0.0316	0.0114	0.0158
OG11884	transcript_HQ_North_transcript21074/f2p0/3405	transcript_HQ_South_transcript/7789/f2p0/3650	0.47291	0.0077	0.0163	0.0039	0.00815
OG11885	transcript_HQ_North_transcript44030/f310p0/1645	transcript_HQ_South_transcript/36444/f2p0/1649	0.75187	0.0255	0.0339	0.01275	0.01695
OG11886	transcript_HQ_North_transcript43400/f6p0/1745	transcript_HQ_South_transcript/34710/f3p0/1746	0	0	0.0069	NA	0.0035
OG11887	transcript_HQ_North_transcript42533/f4p0/1857	transcript_HQ_South_transcript/32934/f4p0/1839	0.22617	0.0055	0.0242	0.00275	0.0121
OG11889	transcript_HQ_North_transcript37015/f2p0/2341	transcript_HQ_South_transcript/13843/f4p0/3050	0.59132	0.0671	0.1134	0.03355	0.0567
OG11891	transcript_HQ_North_transcript6714/f3p0/4894	transcript_HQ_South_transcript/5046/f2p0/4082	0	0	0.0349	NA	0.01745
OG11894	transcript_HQ_North_transcript36194/f2p0/2405	transcript_HQ_South_transcript/13712/f5p0/3062	0	0	0.0141	NA	0.0071
OG11895	transcript_HQ_North_transcript34472/f11p0/2506	transcript_HQ_South_transcript/21875/f2p0/2497	0.21972	0.001	0.0044	0.00045	0.0022
OG11896	transcript_HQ_North_transcript33561/f2p0/2584	transcript_HQ_South_transcript/40769/f3p0/1376	0.24922	0.0186	0.0746	0.0093	0.03735
OG11897	transcript_HQ_North_transcript37074/f3p0/2333	transcript_HQ_South_transcript/11997/f4p0/3232	0.08992	0.0034	0.0382	0.0017	0.01915
OG11898	transcript_HQ_North_transcript33565/f5p0/2576	transcript_HQ_South_transcript/11014/f3p0/3286	0.79591	0.093	0.1169	0.0465	0.05845
OG11899	transcript_HQ_North_transcript42200/f101p0/1869	transcript_HQ_South_transcript/32122/f2p0/1868	0	0	0.0062	NA	0.0031
OG11900	transcript_HQ_North_transcript22485/f7p0/3265	transcript_HQ_South_transcript/32123/f2p0/1918	0.79454	0.3148	0.3963	0.15745	0.19815
OG11902	transcript_HQ_North_transcript43912/f5p0/1689	transcript_HQ_South_transcript/35697/f3p0/1688	NA	0.0046	0	0.0023	NA
OG11903	transcript_HQ_North_transcript33592/f3p0/2591	transcript_HQ_South_transcript/20133/f4p0/2607	NA	0.0024	0	0.0012	NA
OG11904	transcript_HQ_North_transcript32736/f15p0/2633	transcript_HQ_South_transcript/19528/f8p0/2637	0.28274	0.0071	0.0251	0.00355	0.01255
OG11905	transcript_HQ_North_transcript44894/f3p0/1553	transcript_HQ_South_transcript/36562/f2p0/1641	0	0	0.0023	NA	0.00115
OG11906	transcript_HQ_North_transcript37130/f24p0/2298	transcript_HQ_South_transcript/8534/f15p0/3503	0.05661	0.0027	0.0474	0.00135	0.0237
OG11907	transcript_HQ_North_transcript45289/f2p0/1484	transcript_HQ_South_transcript/33975/f2p0/1797	0.42125	0.0143	0.034	0.00715	0.017
OG11908	transcript_HQ_North_transcript33624/f3p0/2576	transcript_HQ_South_transcript/19796/f16p0/2618	0.32812	0.0042	0.0129	0.0021	0.0064
OG11910	transcript_HQ_North_transcript35505/f3p0/2450	transcript_HQ_South_transcript/20708/f2p0/2581	0.53006	0.0026	0.0049	0.0013	0.00245
OG11911	transcript_HQ_North_transcript32763/f3p0/2635	transcript_HQ_South_transcript/18035/f2p0/2748	0.21519	0.003	0.0139	0.00145	0.00695
OG11912	transcript_HQ_North_transcript26639/f20p0/3018	transcript_HQ_South_transcript/34878/f4p0/1739	0	0	0.0026	NA	0.0013
OG11913	transcript_HQ_North_transcript33651/f2p0/2563	transcript_HQ_South_transcript/14362/f5p0/2997	0.54237	0.0126	0.0233	0.0063	0.01165
OG11915	transcript_HQ_North_transcript37340/f2p0/2323	transcript_HQ_South_transcript/26081/f2p0/2254	2.03031	0.0815	0.0402	0.0408	0.02005
OG11918	transcript_HQ_North_transcript37177/f16p0/2316	transcript_HQ_South_transcript/24677/f14p0/2316	NA	0.0012	0	0.0006	NA
OG11921	transcript_HQ_North_transcript42613/f14p0/1833	transcript_HQ_South_transcript/33074/f5p0/1834	0.40431	0.0047	0.0117	0.00235	0.00585
OG11922	transcript_HQ_North_transcript36301/f28p0/2351	transcript_HQ_South_transcript/23933/f40p0/2351	0.94903	0.0149	0.0157	0.00745	0.00785
OG11923	transcript_HQ_North_transcript19568/f3p0/3492	transcript_HQ_South_transcript/34904/f4p0/1728	0.6011	0.6374	1.0604	0.3187	0.5302
OG11924	transcript_HQ_North_transcript44716/f2p0/1579	transcript_HQ_South_transcript/36647/f4p0/1635	0.45801	0.0012	0.0026	0.0006	0.0013
OG11925	transcript_HQ_North_transcript23661/f3p0/3240	transcript_HQ_South_transcript/33090/f2p0/1840	0.53023	0.0153	0.0289	0.00765	0.01445
OG11926	transcript_HQ_North_transcript20699/f41p0/3382	transcript_HQ_South_transcript/3406/f2p0/4471	0	0	0.007	NA	0.0035
OG11930	transcript_HQ_North_transcript38305/f9p0/2242	transcript_HQ_South_transcript/26173/f3p0/2242	1.23488	0.0113	0.0092	0.00565	0.0046
OG11931	transcript_HQ_North_transcript34599/f2p0/2501	transcript_HQ_South_transcript/39400/f6p0/1445	1.19509	0.0038	0.0031	0.0019	0.0016
OG11933	transcript_HQ_North_transcript39774/f2p0/2154	transcript_HQ_South_transcript/33132/f2p0/1840	0.6171	0.008	0.013	0.004	0.0065
OG11935	transcript_HQ_North_transcript42170/f3p0/1902	transcript_HQ_South_transcript/32242/f4p0/1885	0	0	0.0096	NA	0.0048
OG11936	transcript_HQ_North_transcript42879/f3p0/1766	transcript_HQ_South_transcript/33140/f3p0/1830	0.18579	0.006	0.0322	0.003	0.0161
OG11937	transcript_HQ_North_transcript39195/f56p0/2101	transcript_HQ_South_transcript/25291/f2p0/2179	0.60462	0.0178	0.0295	0.00895	0.01475
OG11941	transcript_HQ_North_transcript44350/f4p0/1623	transcript_HQ_South_transcript/36704/f2p0/1639	0	0	0.0121	NA	0.00605
OG11942	transcript_HQ_North_transcript43499/f4p0/1740	transcript_HQ_South_transcript/34966/f2p0/1738	0.55129	0.0025	0.0046	0.00125	0.0023
OG11944	transcript_HQ_North_transcript44452/f10p0/1612	transcript_HQ_South_transcript/36718/f20p0/1617	0.4527	0.0104	0.023	0.00525	0.0115
OG11945	transcript_HQ_North_transcript45281/f2p0/1482	transcript_HQ_South_transcript/36729/f2p0/1650	NA	0	0	NA	NA
OG11946	transcript_HQ_North_transcript43841/f5p0/1696	transcript_HQ_South_transcript/34980/f362p0/1694	0.75032	0.011	0.0147	0.0055	0.00735
OG11947	transcript_HQ_North_transcript37443/f43p0/2292	transcript_HQ_South_transcript/24768/f56p0/2290	NA	0.0026	0	0.0013	NA
OG11949	transcript_HQ_North_transcript42391/f8p0/1860	transcript_HQ_South_transcript/32295/f29p0/1840	0.41403	0.0016	0.004	0.0008	0.002
OG11952	transcript_HQ_North_transcript37281/f2p0/2336	transcript_HQ_South_transcript/38549/f2p0/1526	NA	0.0043	0	0.00215	NA
OG11953	transcript_HQ_North_transcript37286/f5p0/2264	transcript_HQ_South_transcript/23629/f7p0/2388	0.19465	0.0068	0.035	0.0034	0.01745
OG11954	transcript_HQ_North_transcript42217/f7p0/1888	transcript_HQ_South_transcript/33215/f4p0/1826	0.52454	0.0083	0.0157	0.0041	0.00785
OG11955	transcript_HQ_North_transcript42933/f2p0/1809	transcript_HQ_South_transcript/33221/f8p0/1817	0.3219	0.0034	0.0107	0.0017	0.00535
OG11956	transcript_HQ_North_transcript43632/f2p0/1707	transcript_HQ_South_transcript/34203/f2p0/1774	0.25072	0.004	0.0158	0.00195	0.0079
OG11958	transcript_HQ_North_transcript43033/f4p0/1802	transcript_HQ_South_transcript/34205/f80p0/1757	8.63142	0.0684	0.0079	0.0342	0.00395
OG11959	transcript_HQ_North_transcript7677/f2p0/4722	transcript_HQ_South_transcript/33496/f3p0/1827	0.35562	0.0094	0.0263	0.0047	0.01315
OG11960	transcript_HQ_North_transcript43347/f3p0/1770	transcript_HQ_South_transcript/34223/f2p0/1767	NA	0.0148	0	0.0074	NA
OG11961	transcript_HQ_North_transcript38404/f3p0/2275	transcript_HQ_South_transcript/24821/f2p0/2323	0.09864	0.0012	0.0126	0.00065	0.0063
OG11964	transcript_HQ_North_transcript37519/f11p0/2297	transcript_HQ_South_transcript/26131/f2p0/2291	0.69915	0.0096	0.0138	0.00485	0.00685
OG11965	transcript_HQ_North_transcript40174/f2p0/2048	transcript_HQ_South_transcript/42045/f2p0/1292	NA	0	0	NA	NA
OG11966	transcript_HQ_North_transcript37527/f5p0/2298	transcript_HQ_South_transcript/24484/f3p0/2336	0.65899	0.0646	0.098	0.03225	0.04895
OG11969	transcript_HQ_North_transcript43929/f12p0/1622	transcript_HQ_South_transcript/36823/f14p0/1622	0.76739	0.006	0.0078	0.003	0.0039
OG11970	transcript_HQ_North_transcript38442/f4p0/2228	transcript_HQ_South_transcript/25791/f7p0/2265	0.70036	0.007	0.0099	0.00345	0.005
OG11971	transcript_HQ_North_transcript43558/f3p0/1733	transcript_HQ_South_transcript/35038/f2p0/1720	0.31161	0.0095	0.0306	0.00475	0.01525
OG11973	transcript_HQ_North_transcript37572/f9p0/2283	transcript_HQ_South_transcript/25320/f4p0/2283	0.18148	0.0024	0.0133	0.00125	0.00665
OG11975	transcript_HQ_North_transcript44172/f2p0/1650	transcript_HQ_South_transcript/36860/f3p0/1650	0	0	0.0131	NA	0.00655
OG11976	transcript_HQ_North_transcript43431/f3p0/1748	transcript_HQ_South_transcript/34296/f13p0/1752	0	0	0.0037	NA	0.00185
OG11980	transcript_HQ_North_transcript42467/f6p0/1829	transcript_HQ_South_transcript/33329/f2p0/1832	0.44432	0.027	0.0608	0.0135	0.0304
OG11983	transcript_HQ_North_transcript41096/f2p0/2018	transcript_HQ_South_transcript/20178/f2p0/2605	NA	0.0082	0	0.0041	NA
OG11984	transcript_HQ_North_transcript37624/f4p0/2304	transcript_HQ_South_transcript/21313/f4p0/2527	0	0	0.0035	NA	0.00175
OG11985	transcript_HQ_North_transcript38522/f2p0/2227	transcript_HQ_South_transcript/26044/f4p0/2222	0	0	0.0125	NA	0.00625
OG11986	transcript_HQ_North_transcript42089/f6p0/1901	transcript_HQ_South_transcript/32437/f3p0/1897	0.44668	0.0125	0.0279	0.00625	0.01395
OG11987	transcript_HQ_North_transcript41117/f2p0/1997	transcript_HQ_South_transcript/12911/f2p0/3163	NA	0	0	NA	NA
OG11992	transcript_HQ_North_transcript41145/f2p0/2003	transcript_HQ_South_transcript/12315/f2p0/3189	1.14385	0.0032	0.0028	0.0016	0.0014
OG11993	transcript_HQ_North_transcript14467/f2p0/3902	transcript_HQ_South_transcript/34372/f2p0/1783	NA	0.0079	0	0.00395	NA
OG11994	transcript_HQ_North_transcript41739/f3p0/1935	transcript_HQ_South_transcript/32476/f3p0/1887	0	0	0.0205	NA	0.0103
OG11995	transcript_HQ_North_transcript42567/f3p0/1852	transcript_HQ_South_transcript/35136/f3p0/1728	3.9905	0.019	0.0048	0.0095	0.00235
OG11997	transcript_HQ_North_transcript44436/f11p0/1607	transcript_HQ_South_transcript/35157/f2p0/1717	0.44621	0.0332	0.0744	0.0166	0.0372
OG11998	transcript_HQ_North_transcript44420/f5p0/1612	transcript_HQ_South_transcript/36961/f5p0/1611	0.3251	0.0086	0.0264	0.0043	0.0132
OG11999	transcript_HQ_North_transcript11953/f5p0/4147	transcript_HQ_South_transcript/6387/f2p0/3837	NA	0	0	NA	NA
OG12000	transcript_HQ_North_transcript44117/f2p0/1669	transcript_HQ_South_transcript/36974/f4p0/1612	NA	0	0	NA	NA
OG12001	transcript_HQ_North_transcript38598/f4p0/2213	transcript_HQ_South_transcript/26050/f3p0/2244	1.82613	0.0163	0.0089	0.0081	0.00445
OG12002	transcript_HQ_North_transcript43824/f12p0/1689	transcript_HQ_South_transcript/34424/f3p0/1780	NA	0.0028	0	0.0014	NA
OG12003	transcript_HQ_North_transcript37703/f2p0/2331	transcript_HQ_South_transcript/21319/f2p0/2550	0.00322	0.4081	126.593	0.204	63.2963
OG12004	transcript_HQ_North_transcript19597/f35p0/3402	transcript_HQ_South_transcript/9940/f9p0/3401	0	0	0.0284	NA	0.0142
OG12005	transcript_HQ_North_transcript44437/f6p0/1610	transcript_HQ_South_transcript/37004/f2p0/1612	1.86716	0.017	0.0091	0.0085	0.00455
OG12006	transcript_HQ_North_transcript42578/f6p0/1846	transcript_HQ_South_transcript/32548/f18p0/1862	0	0	0.0195	NA	0.00975
OG12007	transcript_HQ_North_transcript41251/f2p0/1990	transcript_HQ_South_transcript/25993/f2p0/2243	0	0	0.0082	NA	0.0041
OG12008	transcript_HQ_North_transcript9110/f3p0/4507	transcript_HQ_South_transcript/3449/f2p0/4491	0	0	0.0139	NA	0.00695
OG12011	transcript_HQ_North_transcript18191/f3p0/3589	transcript_HQ_South_transcript/8235/f3p0/3587	0.4495	0.0081	0.0181	0.0041	0.00905
OG12012	transcript_HQ_North_transcript42178/f2p0/1911	transcript_HQ_South_transcript/39320/f2p0/1462	0.357	0.2394	0.6707	0.1197	0.33535
OG12013	transcript_HQ_North_transcript5749/f2p0/5094	transcript_HQ_South_transcript/35279/f7p0/1704	0.15144	0.0015	0.0098	0.00075	0.0049
OG12014	transcript_HQ_North_transcript15939/f4p0/3784	transcript_HQ_South_transcript/3528/f2p0/4467	0	0	0.0515	NA	0.02575
OG12019	transcript_HQ_North_transcript42815/f7p0/1813	transcript_HQ_South_transcript/33582/f2p0/1809	1.96083	0.0111	0.0057	0.0056	0.0028
OG12020	transcript_HQ_North_transcript42668/f4p0/1841	transcript_HQ_South_transcript/32644/f13p0/1840	0.11084	0.0027	0.024	0.0013	0.012
OG12022	transcript_HQ_North_transcript44426/f5p0/1580	transcript_HQ_South_transcript/37308/f9p0/1575	0.21951	0.0017	0.0079	0.00085	0.00395
OG12023	transcript_HQ_North_transcript42940/f3p0/1811	transcript_HQ_South_transcript/33603/f2p0/1813	0	0	0.0066	NA	0.00325
OG12028	transcript_HQ_North_transcript4137/f2p0/5465	transcript_HQ_South_transcript/23314/f2p0/2404	0.58873	0.0051	0.0087	0.0026	0.00435
OG12029	transcript_HQ_North_transcript43709/f10p0/1689	transcript_HQ_South_transcript/35365/f24p0/1686	NA	0	0	NA	NA
OG12030	transcript_HQ_North_transcript41819/f2p0/1935	transcript_HQ_South_transcript/35366/f2p0/1711	NA	0	0	NA	NA
OG12031	transcript_HQ_North_transcript44614/f2p0/1588	transcript_HQ_South_transcript/37175/f34p0/1587	3.40897	0.1104	0.0324	0.0552	0.0162
OG12032	transcript_HQ_North_transcript6805/f2p0/4892	transcript_HQ_South_transcript/2230/f2p0/4933	0	0	0.0065	NA	0.0033
OG12033	transcript_HQ_North_transcript45385/f29p0/1456	transcript_HQ_South_transcript/38238/f120p0/1454	0.96462	0.0055	0.0058	0.00275	0.00285
OG12035	transcript_HQ_North_transcript44692/f7p0/1550	transcript_HQ_South_transcript/37372/f54p0/1547	0	0	0.0035	NA	0.00175
OG12036	transcript_HQ_North_transcript19775/f2p0/3485	transcript_HQ_South_transcript/39145/f2p0/1512	0.24009	0.0035	0.0146	0.00175	0.0073
OG12037	transcript_HQ_North_transcript43853/f52p0/1639	transcript_HQ_South_transcript/35411/f85p0/1585	0.71671	0.0171	0.0239	0.00855	0.01195
OG12038	transcript_HQ_North_transcript40606/f8p0/2049	transcript_HQ_South_transcript/49549/f2p0/666	0.00349	0.457	130.853	0.2285	65.4263
OG12041	transcript_HQ_North_transcript44399/f2p0/1620	transcript_HQ_South_transcript/37220/f5p0/1591	0.28903	0.0038	0.0132	0.0019	0.0066
OG12044	transcript_HQ_North_transcript37950/f2p0/2251	transcript_HQ_South_transcript/23948/f2p0/2362	0.44293	0.2788	0.6295	0.13945	0.31475
OG12047	transcript_HQ_North_transcript19591/f3p0/3533	transcript_HQ_South_transcript/9163/f10p0/3476	NA	0.0015	0	0.00075	NA
OG12048	transcript_HQ_North_transcript39745/f4p0/2117	transcript_HQ_South_transcript/19888/f2p0/2622	0	0	0.0079	NA	0.00395
OG12049	transcript_HQ_North_transcript44865/f69p0/1501	transcript_HQ_South_transcript/38317/f19p0/1511	1.03738	0.0399	0.0385	0.01995	0.01925
OG12050	transcript_HQ_North_transcript44485/f3p0/1611	transcript_HQ_South_transcript/37256/f6p0/1586	0.90671	0.0039	0.0043	0.00195	0.00215
OG12051	transcript_HQ_North_transcript17658/f10p0/3610	transcript_HQ_South_transcript/40973/f2p0/1358	2.04689	0.0067	0.0033	0.00335	0.00165
OG12052	transcript_HQ_North_transcript46068/f4p0/1301	transcript_HQ_South_transcript/40974/f2p0/1355	0.44571	0.0109	0.0243	0.0054	0.0122
OG12054	transcript_HQ_North_transcript45494/f11p0/1429	transcript_HQ_South_transcript/39244/f2p0/1509	0	0	0.0118	NA	0.0059
OG12055	transcript_HQ_North_transcript30227/f3p0/2801	transcript_HQ_South_transcript/41868/f2p0/1288	0.63167	0.0072	0.0114	0.0036	0.00575
OG12056	transcript_HQ_North_transcript45534/f3p0/1424	transcript_HQ_South_transcript/39245/f9p0/1446	0.46566	0.0343	0.0736	0.01715	0.0368
OG12057	transcript_HQ_North_transcript24087/f2p0/3205	transcript_HQ_South_transcript/37473/f3p0/1602	0.26489	0.0033	0.0124	0.00165	0.0062
OG12058	transcript_HQ_North_transcript28277/f3p0/2931	transcript_HQ_South_transcript/3925/f2p0/4349	0.11291	0.0153	0.1351	0.00765	0.06755
OG12059	transcript_HQ_North_transcript40706/f2p0/2054	transcript_HQ_South_transcript/24568/f2p0/2334	0.02439	0.1842	7.5515	0.0921	3.77575
OG12061	transcript_HQ_North_transcript41513/f2p0/1959	transcript_HQ_South_transcript/23631/f2p0/2410	NA	0	0	NA	NA
OG12062	transcript_HQ_North_transcript31021/f6p0/2744	transcript_HQ_South_transcript/40159/f3p0/1414	NA	0.0093	0	0.00465	NA
OG12065	transcript_HQ_North_transcript45461/f2p0/1446	transcript_HQ_South_transcript/37529/f4p0/1522	0.39023	0.0128	0.0329	0.0064	0.0165
OG12066	transcript_HQ_North_transcript45591/f3p0/1411	transcript_HQ_South_transcript/40171/f7p0/1414	0.82053	0.0425	0.0518	0.02125	0.0259
OG12069	transcript_HQ_North_transcript44869/f4p0/1548	transcript_HQ_South_transcript/37554/f5p0/1571	0.29537	0.0138	0.0466	0.00685	0.02325
OG12071	transcript_HQ_North_transcript41748/f2p0/1941	transcript_HQ_South_transcript/39324/f2p0/1467	0	0	0.0152	NA	0.0076
OG12074	transcript_HQ_North_transcript46065/f8p0/1281	transcript_HQ_South_transcript/41976/f6p0/1280	0.29027	0.0105	0.036	0.00525	0.01805
OG12075	transcript_HQ_North_transcript45569/f2p0/1416	transcript_HQ_South_transcript/40215/f3p0/1416	NA	0.0065	0	0.00325	NA
OG12076	transcript_HQ_North_transcript39004/f15p0/2179	transcript_HQ_South_transcript/19190/f2p0/2659	0.37849	0.0039	0.0102	0.00195	0.0051
OG12077	transcript_HQ_North_transcript45561/f17p0/1422	transcript_HQ_South_transcript/39372/f30p0/1420	1.4282	0.0272	0.019	0.01355	0.0095
OG12079	transcript_HQ_North_transcript11693/f2p0/4197	transcript_HQ_South_transcript/38475/f8p0/1514	0	0	0.0316	NA	0.0158
OG12082	transcript_HQ_North_transcript38109/f3p0/2255	transcript_HQ_South_transcript/25529/f3p0/2275	0.06827	0.0028	0.0405	0.0014	0.0203
OG12084	transcript_HQ_North_transcript45912/f8p0/1338	transcript_HQ_South_transcript/41159/f16p0/1338	NA	0	0	NA	NA
OG12085	transcript_HQ_North_transcript38126/f6p0/2260	transcript_HQ_South_transcript/49231/f2p0/690	0.45452	0.0198	0.0436	0.0099	0.0218
OG12086	transcript_HQ_North_transcript45348/f38p0/1466	transcript_HQ_South_transcript/39433/f44p0/1453	0.34448	0.0107	0.031	0.00535	0.0155
OG12087	transcript_HQ_North_transcript38129/f3p0/2268	transcript_HQ_South_transcript/17650/f2p0/2776	NA	0	0	NA	NA
OG12091	transcript_HQ_North_transcript30095/f5p0/2810	transcript_HQ_South_transcript/41219/f2p0/1349	0.16564	0.0089	0.054	0.0045	0.02695
OG12093	transcript_HQ_North_transcript45946/f2p0/1349	transcript_HQ_South_transcript/41246/f3p0/1343	1.40272	0.0469	0.0334	0.02345	0.0167
OG12094	transcript_HQ_North_transcript38177/f35p0/2232	transcript_HQ_South_transcript/24937/f52p0/2231	0	0	0.0387	NA	0.0194
OG12097	transcript_HQ_North_transcript45396/f2p0/1465	transcript_HQ_South_transcript/39507/f3p0/1475	0.89026	0.0161	0.0181	0.008	0.009
OG12098	transcript_HQ_North_transcript10126/f2p0/4368	transcript_HQ_South_transcript/3864/f5p0/4364	0.153	0.004	0.0264	0.002	0.0132
OG12099	transcript_HQ_North_transcript44985/f11p0/1524	transcript_HQ_South_transcript/38655/f4p0/1512	0.74068	0.0179	0.0241	0.00895	0.01205
OG12101	transcript_HQ_North_transcript46275/f3p0/1238	transcript_HQ_South_transcript/42204/f2p0/1259	0.70282	0.0178	0.0253	0.0089	0.01265
OG12103	transcript_HQ_North_transcript46818/f8p0/903	transcript_LQ_South_transcript/46273/f2p0/935	1.31742	0.0245	0.0186	0.01225	0.0093
OG12104	transcript_HQ_North_transcript38239/f6p0/2236	transcript_HQ_South_transcript/26072/f2p0/2249	0	0	0.0057	NA	0.0029
OG12107	transcript_HQ_North_transcript44554/f2p0/1600	transcript_HQ_South_transcript/42258/f32p0/1248	1.65621	0.0229	0.0138	0.0115	0.0069
OG12109	transcript_HQ_North_transcript42876/f2p0/1811	transcript_HQ_South_transcript/19348/f2p0/2658	0.26216	0.0166	0.0632	0.0083	0.0316
OG12110	transcript_HQ_North_transcript4277/f2p0/5467	transcript_HQ_South_transcript/16027/f3p0/2890	0.38022	0.4805	1.2638	0.24025	0.63185
OG12111	transcript_HQ_North_transcript46410/f3p0/1186	transcript_HQ_South_transcript/42818/f7p0/1183	0.20608	0.0031	0.0152	0.00155	0.0076
OG12112	transcript_HQ_North_transcript45798/f13p0/1368	transcript_HQ_South_transcript/40521/f17p0/1363	NA	0.0114	0	0.0057	NA
OG12113	transcript_HQ_North_transcript46444/f2p0/1168	transcript_HQ_South_transcript/43860/f83p0/1125	0.41522	0.0082	0.0197	0.0041	0.00985
OG12114	transcript_HQ_North_transcript43133/f3p0/1819	transcript_HQ_South_transcript/40558/f5p0/1371	NA	0.0095	0	0.00475	NA
OG12115	transcript_HQ_North_transcript46456/f2p0/1161	transcript_HQ_South_transcript/16414/f7p0/2861	1.18814	0.0647	0.0545	0.03235	0.02725
OG12116	transcript_HQ_North_transcript46680/f2p0/1022	transcript_HQ_South_transcript/40574/f2p0/1387	0.14485	0.0088	0.061	0.0044	0.0305
OG12117	transcript_HQ_North_transcript44676/f2p0/1582	transcript_HQ_South_transcript/42958/f2p0/1239	2.17223	0.0078	0.0036	0.0039	0.00175
OG12118	transcript_HQ_North_transcript43818/f2p0/1703	transcript_HQ_South_transcript/45339/f3p0/1028	NA	0	0	NA	NA
OG12119	transcript_HQ_North_transcript46038/f12p0/1302	transcript_HQ_South_transcript/41490/f19p0/1302	0.29985	0.0051	0.017	0.00255	0.0085
OG12120	transcript_HQ_North_transcript45629/f7p0/1401	transcript_HQ_South_transcript/44341/f3p0/1117	2.47735	0.0439	0.0177	0.022	0.00885
OG12121	transcript_HQ_North_transcript44177/f2p0/1652	transcript_HQ_South_transcript/38849/f2p0/1498	1.49169	0.0272	0.0182	0.0136	0.0091
OG12122	transcript_HQ_North_transcript46526/f3p0/1130	transcript_HQ_South_transcript/43832/f3p0/1131	0.79918	0.0128	0.016	0.0064	0.008
OG12123	transcript_HQ_North_transcript44788/f7p0/1559	transcript_HQ_South_transcript/37968/f12p0/1545	1.3738	0.0053	0.0038	0.00265	0.00195
OG12125	transcript_HQ_North_transcript46547/f11p0/1118	transcript_HQ_South_transcript/44181/f31p0/1117	0.15143	0.0053	0.0347	0.00265	0.0173
OG12126	transcript_HQ_North_transcript45045/f40p0/1481	transcript_HQ_South_transcript/39740/f28p0/1425	0.72578	0.0152	0.0209	0.0076	0.01045
OG12127	transcript_HQ_North_transcript44997/f3p0/1529	transcript_HQ_South_transcript/37991/f19p0/1519	2.24135	0.0085	0.0038	0.0043	0.0019
OG12128	transcript_HQ_North_transcript11119/f7p0/4250	transcript_HQ_South_transcript/4245/f2p0/4268	0	0	0.0327	NA	0.01635
OG12129	transcript_HQ_North_transcript43022/f3p0/1802	transcript_HQ_South_transcript/26205/f3p0/2233	0.25562	0.0035	0.0138	0.00175	0.0069
OG12131	transcript_HQ_North_transcript46591/f3p0/1094	transcript_HQ_South_transcript/45718/f2p0/994	NA	0.0106	0	0.0053	NA
OG12132	transcript_HQ_North_transcript4660/f18p0/5319	transcript_HQ_South_transcript/1604/f3p0/5278	0.7601	0.0299	0.0394	0.01495	0.0197
OG12134	transcript_HQ_North_transcript46606/f52p0/1043	transcript_HQ_South_transcript/46511/f5p0/925	0.05459	0.0021	0.0392	0.00105	0.0196
OG12135	transcript_HQ_North_transcript46052/f2p0/1321	transcript_HQ_South_transcript/41614/f2p0/1330	0.1078	0.0044	0.0407	0.0022	0.02035
[truncated: 184 more rows]
